# Supplementary material for: Metabolome and microbiome analyses of the anti-fatigue mechanism ofAcanthopanax senticosusleaves
Source: Royal Society of Chemistry journal article supplement (doi:10.1039/d3fo05311c), 2024-01-01
Supplement: d3fo05311c1.pdf [file d3fo05311c1.pdf]

1 Multi-omics analysis reveals the anti-fatigue mechanism of *Acanthopanax senticosus*  
2 leaf extract

3 **Chao Shi<sup>1,2</sup>, Zehua Liang<sup>1,2</sup>, Ting Li<sup>1,2</sup>, Qi Hao<sup>1,2</sup>, Hongyu Xiang<sup>1,2,3,4\*</sup> and Qiuhong**  
4 **Xie<sup>1,2,3,4\*</sup>**

5 <sup>1</sup> National Engineering Laboratory for AIDS Vaccine, School of Life Sciences, Jilin  
6 University, Changchun 130012, P.R. China

7 <sup>2</sup> School of Life Sciences, Jilin University, Changchun 130012, P.R. China

8 <sup>3</sup>Key Laboratory for Molecular Enzymology and Engineering of Ministry of Education,  
9 School of Life Sciences, Jilin University, Changchun 130012, P.R. China

10 <sup>4</sup> Institute of Changbai Mountain Resource and Health, Jilin University, Fusong  
11 134504, P.R. China

12 \* Corresponding author:

13 Hongyu Xiang, Professor; E-mail: [hyxiang@jlu.edu.cn](mailto:hyxiang@jlu.edu.cn); Tel/Fax: +86-431-85153832

14 Qiuhong Xie, Professor; E-mail: [qhxie@jlu.edu.cn](mailto:qhxie@jlu.edu.cn); Tel/Fax: +86-431-85153832

15

|    |           |
|----|-----------|
| 16 | Methods   |
| 17 | Table S1  |
| 18 | Table S2  |
| 19 | Figure S1 |
| 20 | Figure S2 |
| 21 | Figure S3 |
| 22 | Figure S4 |
| 23 | Figure S5 |
| 24 | Figure S6 |
| 25 | Figure S7 |

## 26 **Methods**

### 27 Gastrointestine simulation

28 We built a 4-compartment gastrointestinal tract simulator following the work of K. Molly et al (1).  
29 The composition schematic and real images are shown in Figure S4. The first three chambers  
30 simulated the stomach, duodenum, and small intestine to stimulate *in vivo* environment, and the  
31 fourth chamber served as an intestinal microbial fermenter. 35 g of healthy human feces were  
32 collected and mixed with sodium phosphate buffer (w/V=1:4). After centrifuging, the supernatant  
33 was collected as inoculum. During the 7-day acclimation period, 200 ml of nutrient medium (g/L:  
34 arabinogalactan 1, pectin 2, xylan 1, starch 4.2, glucose 0.4, annual extract 3, peptone 1, mucin 4,  
35 cystine 0.5, NaHCO<sub>3</sub> 0.4, NaCl 0.08, K<sub>2</sub>HPO<sub>4</sub> 0.04, KH<sub>2</sub>PO<sub>4</sub> 0.04, CaCl<sub>2</sub> 0.008, MgSO<sub>4</sub>-7H<sub>2</sub>O  
36 0.008, FeCl<sub>2</sub> 0.008, vitamin C 0.008, MnSO<sub>4</sub> 0.008, Tween-80 1, hemoglobin 0.005) was pumped  
37 into stomach chamber at 10:00 and 16:00. Every time after simulated feeding, 100 mL of gastric  
38 juice (NaCl 2.0 g/L, protease (10000 activity units) 0.8 g/L, 7 ml of concentrated hydrochloric acid,  
39 pH 1.5) was added to react for 1 h (2). All fluids were then pumped into the duodenal chamber  
40 where pH was then adjusted to 7.0 with 150 mM NaHCO<sub>3</sub>. After the contents were transferred to  
41 the small intestine, 150 ml of pancreatic juice (g/L: pig's bile salt 4, pancreatic enzyme 0.9) was  
42 pumped into it. When the pH was stabilized at 6.4, all contents were pumped into the reactor  
43 chamber. During the 14-day intervention, the steps remained the same except for the addition of 1  
44 g ASLE to the food solution at each meal. The pump rotation time and speed were set to  
45 automatically discharge a portion of the solution from the reactor tank. 10% CO<sub>2</sub> + 90% N<sub>2</sub> was  
46 used as the headspace gas for the anaerobic environment. During the intervention, the effluent was  
47 collected and stored every 2 days and stored at -80°C. Schematic diagram and actual picture of  
48 gastrointestinal simulator were shown in Fig S4 A&B.

49 **Table S1.** Primers used in qPCR.

| Gene name                     | Primer                           |
|-------------------------------|----------------------------------|
| <i>IL1b</i>                   | F:5'-TCCATGAGCTTTGTACAAGGA-3'    |
|                               | R:5'-AGCCCATACTTTAGGAAGACA-3'    |
| <i>IL6</i>                    | F:5'-GTTCTCTGGGAAATCGTGGA-3'     |
|                               | R:5'-TGTA CTCCAGGTAGCTA-3'       |
| <i>COX2</i>                   | F:5'-GTTCTCTGGGAAATCGTGGA-3'     |
|                               | R:5'-TGTA CTCCAGGTAGCTA-3'       |
| <i>iNOS</i>                   | F:5'-TGTCTGCAGCACTTGGATCA-3'     |
|                               | R:5'-AACTTCGGAAGGGAGCAATG-3'     |
| <i>Occludin</i>               | F:5'-ATGTCCGGCCGATGCTCTC-3'      |
|                               | R:5'-TTTGGCTGCTCTTGGGTCTGTAT-3'  |
| <i>ZO1</i>                    | F:5'-TTTTTGACAGGGGGAGTGG-3'      |
|                               | R:5'-TGCTGCAGAGGTCAAAGTTCAAG-3'  |
| <i>Claudin1</i>               | F:5'-CCCGAGCCTTGATGGTAA-3'       |
|                               | R:5'-CACTAATGTCGCCAGACCTGA-3'    |
| <i>Muc2</i>                   | F:5'-ACGTGTCATATTTGCACCTCT-3'    |
|                               | R:5'-TCAACATTGAGAGTGCCAACT-3'    |
| <i>Nrf2</i>                   | F:5'-GTCTTCACTGCCCCTCATC-3'      |
|                               | R:5'-TCGGGAATGGAAAATAGCTCC-3'    |
| <i>HO1</i>                    | F:5'-TCAGTCCCAAACGTCGCGGT-3'     |
|                               | R:5'-GCTGTGCAGGTGTTGAGCC-3'      |
| <i>Gclc</i>                   | F:5'-ACATCTACCACGCAGTCAAGGACC-3' |
|                               | R:5'-CTCAAGAACATCGCCTCCATTCAG-3' |
| <i>Foxo3a</i>                 | F:5'-AGTGGATGGTGCGCTGTGT-3'      |
|                               | R:5'-CTGTGCAGGGACAGGTTGT-3'      |
| <i>TNF<math>\alpha</math></i> | F:5'-AGACCCTCACACTCAGATCA-3'     |
|                               | R:5'-TCTTTGAGATCCATGCCGTTG-3'    |

*Nfkb1* F:5'-ATGGCAGACGATGATCCCTAC-3'  
R:5'-TGTTGACAGTGGTATTTCTGGTG-3'

*Gys2* F:5'-ACCAAGGCCAAAACGACAG-3'  
R:5'-GGGCTCACATTGTTCTACTTGA-3'

*Pygl* F:5'-GAGAAGCGACGGCAGATCAG-3'  
R:5'-CTTGACCAGAGTGAAGTGCAG-3'

*Gsk3b* F:5'-TGGCAGCAAGGTAACCACAG-3'  
R:5'-CGGTTCTTAAATCGCTTGTCTTG-3'

*Fbp1* F:5'-TATGGTGGAAAGGGACGGGAA -3'  
R:5'-CCTCTGGTGATACTCAAGGATGG-3'

*Idh2* F:5'-GGAGAAGCCGGTAGTGGAGAT-3'  
R:5'-GGTCTGGTCACGGTTTGGAA-3'

*Pck1* F:5'-TGCATAACGGTCTGGACTTC-3'  
R:5'-CAGCAACTGCCCGTACTCC-3'

*Pcx* F:5'-CTGAAGTTCCAAACAGTTCGAGG-3'  
R:5'-CGCACGAAACACTCGGATG-3'

*Pfkl* F:5'-GGAGGCGAGAACATCAAGCC-3'  
R:5'-CGGCCTTCCCTCGTAGTGA-3'

*18S* F:5'-AAACGGCTACCACATCCAAG-3'  
R:5'-CCTCCAATGGATCCTCGTTA-3'

---

51 **Table S2** The exhaustion distance of mice during each exercise session on the treadmill

|    | EC              | ASLEL         | ASLEM         | ASLEH         |
|----|-----------------|---------------|---------------|---------------|
| 1  | 801.45±167.93   | 785.39±183.79 | 751.50±82.37  | 737.78±237.38 |
| 2  | 715.67±108.46   | 720.10±268.35 | 736.37±62.20  | 725.18±282.11 |
| 3  | 617.50±267.16 * | 655.83±314.42 | 793.30±173.36 | 762.33±268.87 |
| 4  | 505.75±181.50 * | 728.42±229.14 | 646.00±168.14 | 762.50±211.48 |
| 5  | 574.83±124.92 * | 649.75±263.54 | 673.75±176.30 | 730.36±189.09 |
| 6  | 529.83±112.38 * | 775.54±92.58  | 627.58±149.19 | 610.00±195.93 |
| 7  | 598.92±149.08 * | 693.17±225.20 | 717.91±108.82 | 723.18±256.01 |
| 8  | 589.00±193.63   | 667.83±276.03 | 794.82±130.91 | 781.70±215.07 |
| 9  | 604.08±259.27 * | 629.17±260.61 | 683.08±123.37 | 694.00±279.35 |
| 10 | 657.50±175.20   | 668.50±244.64 | 721.08±136.59 | 755.34±183.58 |
| 11 | 618.43±33.49 *  | 750.60±74.05  | 784.25±46.56  | 838.25±176.43 |

52 All data are expressed as mean ± SD (n=8). The asterisk (\*) represents significant differences  
 53 compared to the exhaustion distance in the first trial ( $p<0.05$ ).

54 **Table S3** Metabolites regulated by exercise and ASLE in ileum contents

| Compound name                | Chemical shift                | EC vs. NC   |                | ASLEH vs. EC |                |
|------------------------------|-------------------------------|-------------|----------------|--------------|----------------|
|                              |                               | Fold change | <i>p</i> value | Fold change  | <i>p</i> value |
| L-isoleucine                 | 0.93(t), 1.00(d), 1.46(m)     | 1.404       | 0.014          |              | □              |
| L-leucine                    | 0.95(t),1.70(m)               | 1.404       | 0.013          |              |                |
| L-Valine                     | 0.98(d),1.03(d)               | 1.319       | 0.012          |              |                |
| L-alanine                    | 1.47(d)                       | 1.278       | 0.041          |              |                |
| alpha-Hydroxyisobutyric acid | 1.34(s)                       | 1.260       | 0.001          |              |                |
| L-Glutamic acid              | 2,04(s),2.12(s),2.34(s)       | 1.281       | 0.002          |              |                |
| L-Methionine                 | 2,04(s),2.12(s),2.34(s)       | 0.902       | 0.124          |              |                |
| Choline                      | 3.19(s),3.51(dd)              | 1.222       | 0.045          |              |                |
| phenylacetic acid            | 3.52(s)                       | 0.588       | 0.012          |              |                |
| Glycine                      | 3.54(s)                       | 1.005       | 0.956          |              |                |
| L-carnitine                  | 4.60(m)                       | 1.147       | 0.033          |              |                |
| L-Tyrosine                   | 6.90(ddd),6.93(ddd),7.19(ddd) | 1.713       | 0.016          |              |                |
| L-Phenylalanine              | 7.37(m)                       | 1.404       | 0.012          |              |                |
| Oxoglutaric acid             | 3.00(m)                       | 1.547       | 0.013          | 1.113        | 0.023          |
| creatinine                   | 3.03(s)                       | 1.762       | 0.023          | 1.022        | 0.295          |
| D-Glucose                    | 3.46(dt),3.73(dd),3.89(dd)    | 0.592       | 0.018          | 0.716        | 0.267          |
| Taurine                      | 3.25(t),3.42(t)               | 0.683       | 0.065          | 0.600        | 0.020          |
| Trimethylamine N-oxide       | 3.25(s)                       | 0.472       | 0.065          | 0.519        | 0.018          |
| Ethanol                      | 1.17(t),3.65(q)               | 0.743       | 0.378          | 0.796        | 0.757          |
| Acetic acid                  | 1.91(m)                       | 1.021       | 0.767          | 0.985        | 0.179          |
| Indoleacetyl glycine         | 3.80(s)                       | 0.767       | 0.066          | 0.814        | 0.050          |
| L-Tryptophan                 | 3.29(dd),4.05(dd)             |             |                | 0.750        | 0.036          |
| Sarcosine                    | 2.73(s)                       |             |                | 1.278        | 0.017          |
| Trimethylamine               | 2.89(s)                       |             |                | 0.900        | 0.094          |
| cis-Aconitic acid            | 3.12(s)                       |             |                | 1.458        | 0.003          |
| Creatine                     | 3.92(s)                       |             |                | 1.116        | 0.021          |

|           |         |       |       |
|-----------|---------|-------|-------|
| Allantoin | 5.38(s) | 1.134 | 0.704 |
|-----------|---------|-------|-------|

The raw data associated with this table is in Supplementary information 3. “-” represents VIP<2.



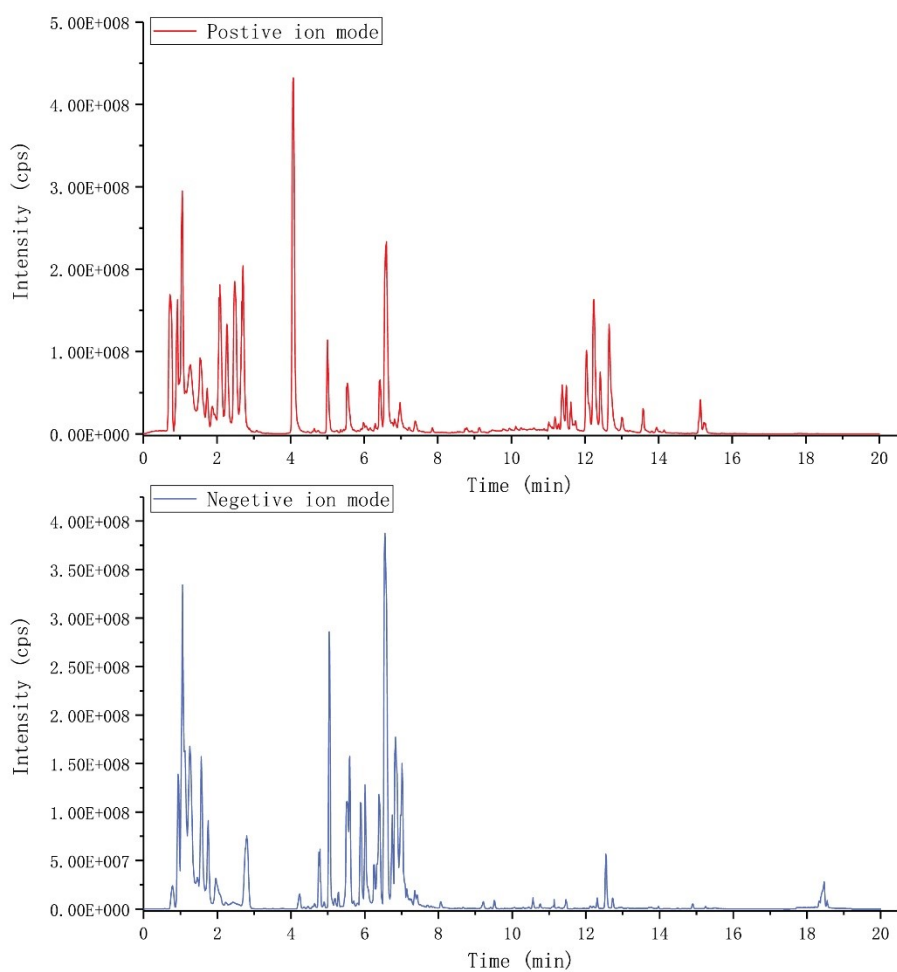

56

57 **Figure S1.** Ultra performance liquid chromatography mass spectrometry chromatograms of  
58 *Acanthopanax senticosus* leaves extracts. The molecular information corresponding to the retention  
59 time is displayed in the supplementary material 2.

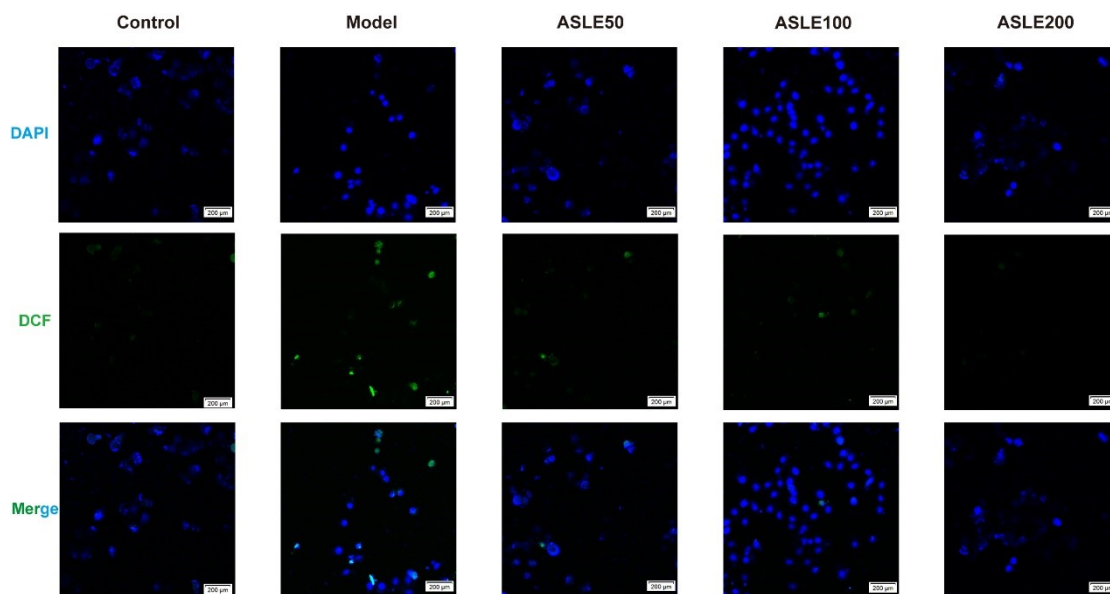

60

61 **Figure S2.** Effects of H<sub>2</sub>O<sub>2</sub> on reactive oxygen species (ROS). DCFH-DA (2',7'-  
 62 Dichlorodihydrofluorescein diacetate) can freely cross the cell membrane and hydrolyzed by  
 63 intracellular enzymes and can be oxidized by ROS to generate green fluorescence.

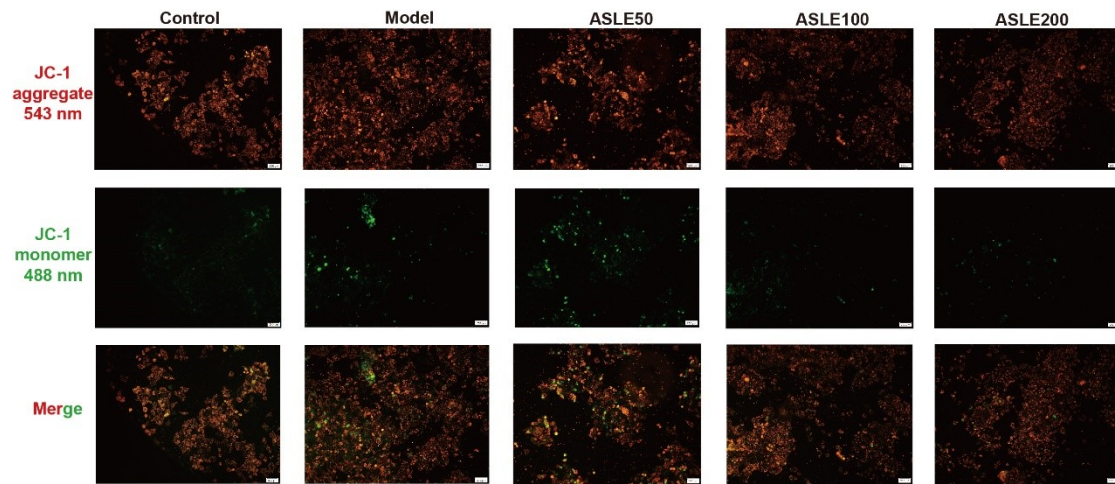

64

65 **Figure S3.** Effects of H<sub>2</sub>O<sub>2</sub> and ASLE on mitochondrial membrane potential. When the  
 66 mitochondrial membrane potential is high, JC-1 aggregates in the matrix of mitochondria and  
 67 generates red fluorescence; When the mitochondrial membrane potential is abnormal, JC-1 is a  
 68 monomer and can generate green fluorescence.

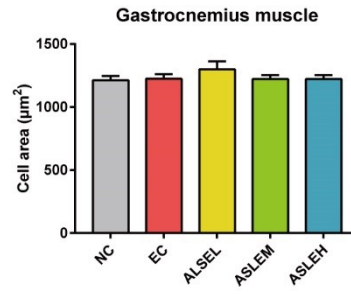

69

70 **Figure S4.** Cell area of gastrocnemius cell. The cross-sectional area of all muscle fibers  
71 in one field of view was counted and the results were expressed as mean  $\pm$  SEM  
72 (average area of all myocytes in one random microscopic field of view).

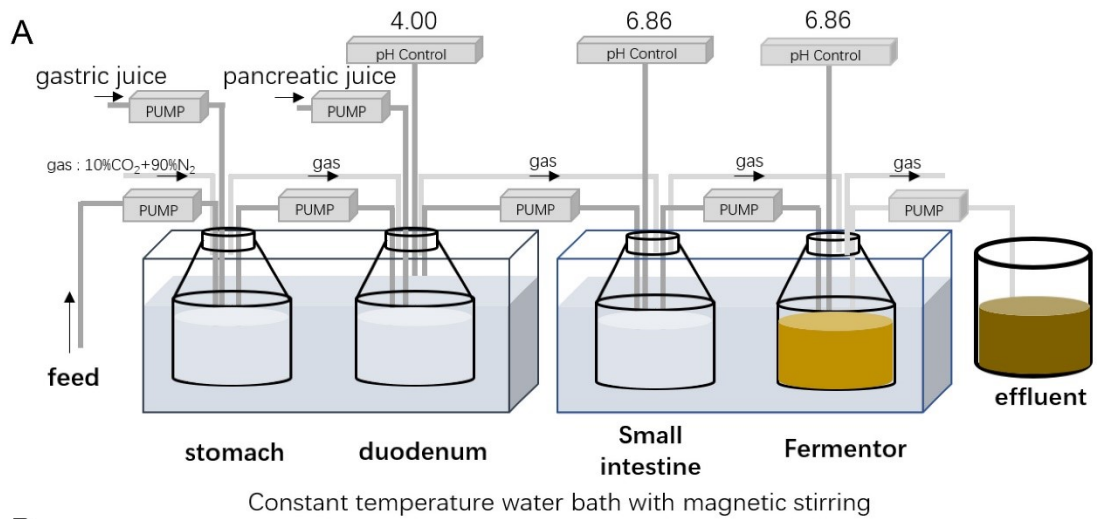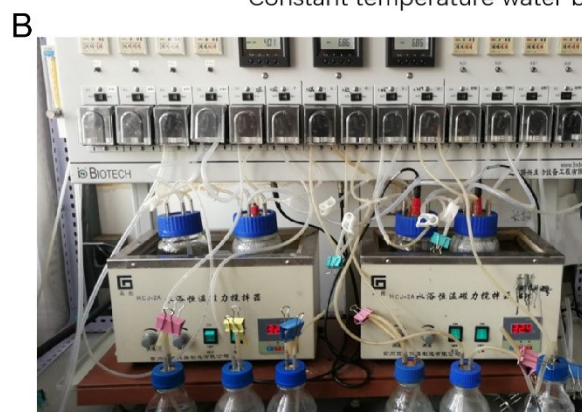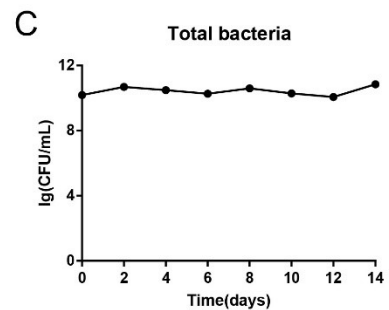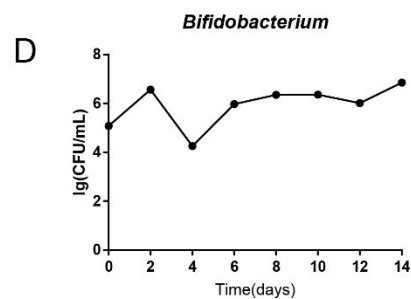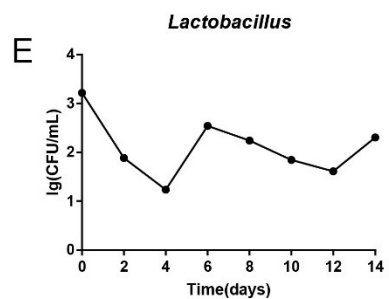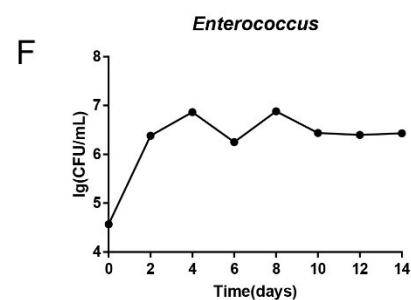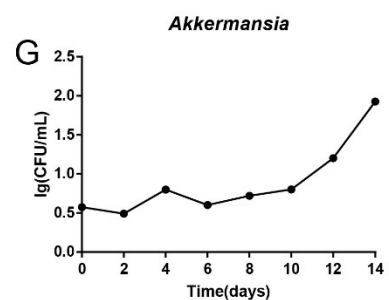

73

74 **Figure S5.** Effect of ASLE on bacteria in gastrointestinal stimulator. (A) Schematic diagram of  
 75 gastrointestinal stimulator; (B) Actual picture of gastrointestinal stimulator; (C-G) Effect of ASLE  
 76 on bacterial counts at genus level.

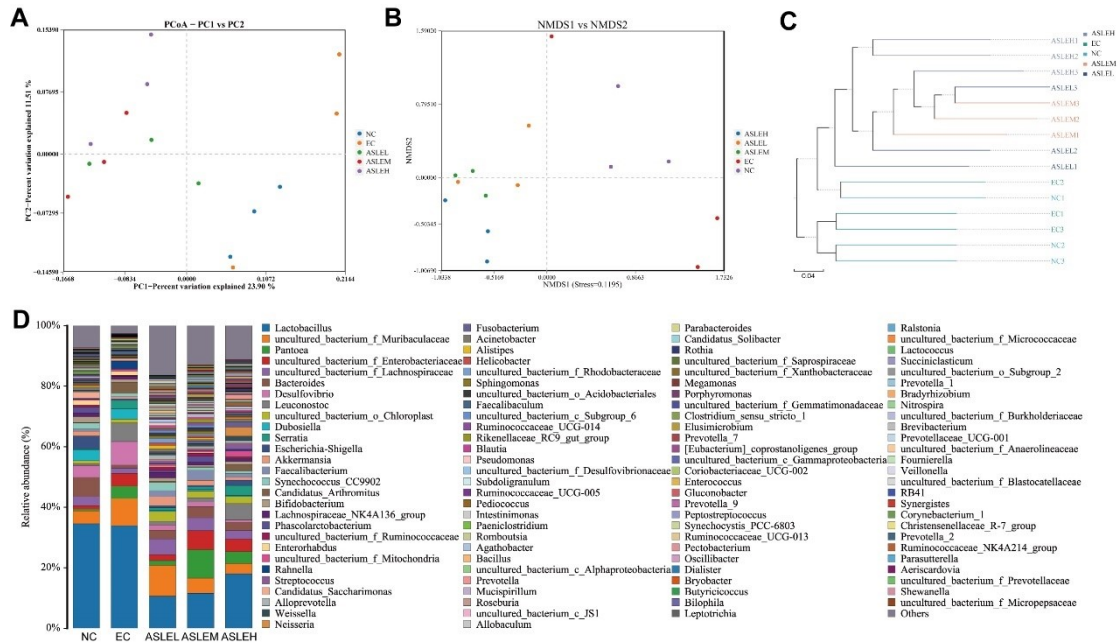

77

78 **Figure S6.**  $\beta$ -diversity of microbiota in cecum contents. (A)PCoA, (B)NMDS,  
 79 (C)UPGMA, and (D) microbiota composition at genus level of cecum microbiota (n=3).

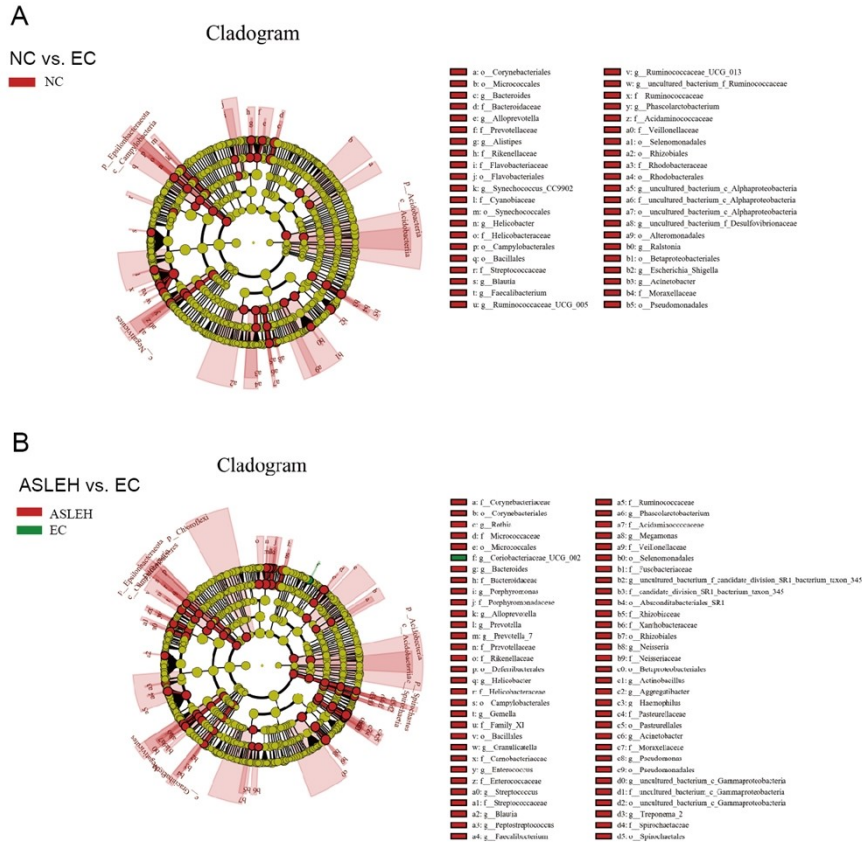

80

81 **Figure S7.** Cladogram of microbiota based on a LDA score above 3.0 (A)NC vs. EC;  
 82 (B) ASLEH vs. EC. LDA: linear discriminant analysis.

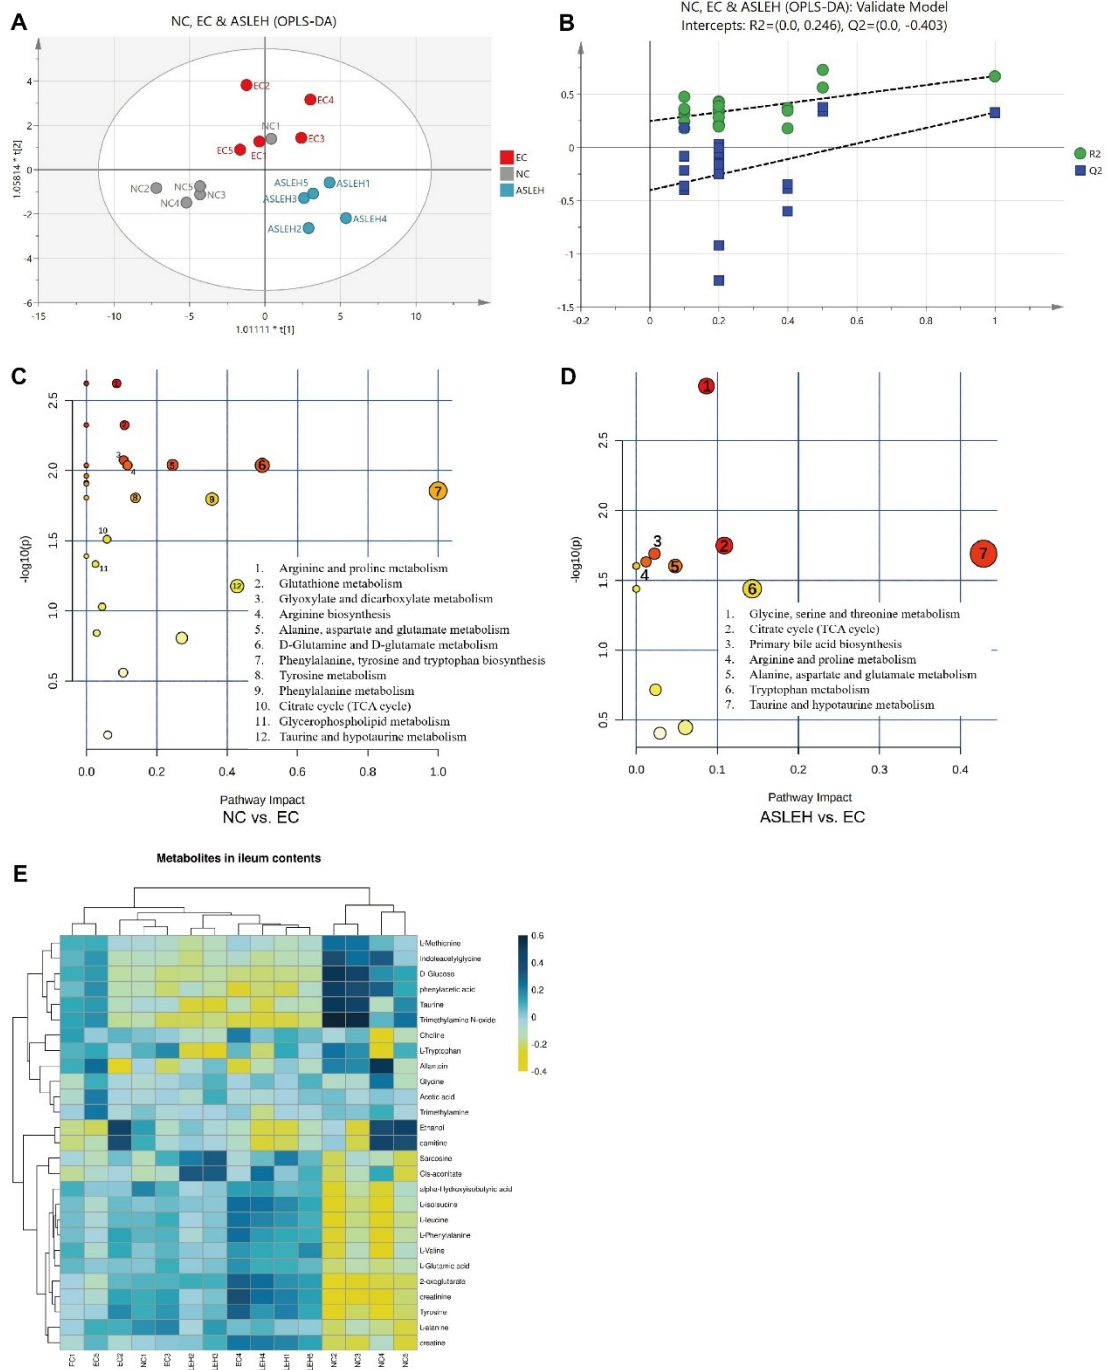

83

84 **Figure S7.** Metabolites in ileum contents altered by excessive exercise and ASLE supplementation.  
 85 (A) OPLS-DA diagram; (B) OPLS-DA model permutation; regulated pathways of (C) EC vs. NC  
 86 group and (D) ASLEH vs. EC group (n=5); (E) Heatmap of metabolites based on euclidean distance.



87 **Reference**

- 88 1. Molly K, Vande Woestyne M, Verstraete W. Development of a 5-Step Multi-Chamber Reactor as a  
89 Simulation of the Human Intestinal Microbial Ecosystem. *Appl Microbiol Biotechnol* (1993) 39(2):254-  
90 8. doi: 10.1007/BF00228615.
- 91 2. Ichim TE, Patel AN, Shafer KA. Experimental Support for the Effects of a Probiotic/Digestive  
92 Enzyme Supplement on Serum Cholesterol Concentrations and the Intestinal Microbiome. *J Transl Med*  
93 (2016) 14(1):184. Epub 20160622. doi: 10.1186/s12967-016-0945-2.  
94
