# Supplementary material for: Metabolome and microbiome analyses of the anti-fatigue mechanism ofAcanthopanax senticosusleaves
Source: Royal Society of Chemistry journal article supplement (doi:10.1039/d3fo05311c), 2024-01-01
Supplement: d3fo05311c2.xlsx [file d3fo05311c2.xlsx]

## Sheet: meta_intensity_all
Compound_ID	Name	Formula	Molecular Weight	RT [min]	Class(English)	CAS	all_SC
Com_1680_pos	L-Phenylalanine	C9H11NO2	165.19	4.108	Amino Acid And Derivatives	"63-91-2"	658400000
Com_1209_pos	D-Phenylalanine	C9H11NO2	165.19	4.106	Amino Acid And Derivatives	"673-06-3"	640500000
Com_1149_pos	isoleucine	C6H13NO2	131.17	2.11	Amino Acid And Derivatives	"73-32-5"	361200000
Com_1471_pos	2-Phenylglycine	C8H9NO2	151.163	2.78	Amino Acid And Derivatives	"2835-06-5"	344600000
Com_1152_pos	L-Leucine	C6H13NO2	131.17	2.32	Amino Acid And Derivatives	"61-90-5"	211100000
Com_1267_pos	L-Glutamic acid	C5H9NO4	147.13	0.886	Amino Acid And Derivatives	"56-86-0"	149000000
Com_1030_pos	L-Tryptophan	C11H12N2O2	204.23	4.894	Amino Acid And Derivatives	"73-22-3"	114800000
Com_229_neg	N-Acetylornithine	C7H14N2O3	174.2	0.896	Amino Acid And Derivatives	"6205-08-9"	111100000
Com_1685_pos	D-Pyroglutamic acid	C5H7NO3	129.114	1.62	Amino Acid And Derivatives	"4042-36-8"	81740000
Com_1399_pos	L-Homocystine	C8H16N2O4S2	268.354	2.5	Amino Acid And Derivatives	"626-72-2"	81110000
Com_813_pos	L-Methionine sulfone	C5H11NO4S	181.21	1.84	Amino Acid And Derivatives	"7314-32-1"	72350000
Com_1003_pos	Valine	C5H11NO2	117.146	1.09	Amino Acid And Derivatives	"516-06-3"	69370000
Com_1222_pos	2-Aminoisobutyric acid	C4H9NO2	103.063	0.82	Amino acids and derivatives	"62-57-7"	68000000
Com_1519_pos	S-Methyl-L-cysteine	C4H9NO2S	135.185	1.04	Amino Acid And Derivatives	"1187-84-4"	62190000
Com_899_pos	N-Methyl-a-aminoisobutyric acid	C5H11NO2	117.146	1.22	Amino Acid And Derivatives	"2566-34-9"	57750000
Com_1212_pos	DL-Norvaline	C5H11NO2	117.15	1.068	Amino Acid And Derivatives	"760-78-1"	47450000
Com_1001_pos	Dl-Norleucine	C6H13NO2	131.173	0.9	Amino Acid And Derivatives	"616-06-8"	35250000
Com_920_pos	N-acetylglycine	C4H7NO3	117.043	0.91	Amino Acid And Derivatives	"543-24-8"	34810000
Com_1263_pos	N-Methylsarcosine	C4H9NO2	103.12	0.9	Amino Acid And Derivatives	"1118-68-9"	31590000
Com_359_neg	Aspartate	C4H7NO4	133.103	0.85	Amino Acid And Derivatives	"617-45-8"	31070000
Com_1081_pos	D-Proline	C5H9NO2	115.13	0.967	Amino Acid And Derivatives	"344-25-2"	30950000
Com_937_pos	Cycloleucine	C6H11NO2	129.157	0.84	Amino Acid And Derivatives	"52-52-8"	27420000
Com_537_neg	L-threo-3-Methylaspartate	C5H9NO4	147.053	0.87	Amino acids and derivatives	"6061-13-8"	24210000
Com_1002_pos	Proline	C5H9NO2	115.131	0.96	Amino Acid And Derivatives	"609-36-9"	21860000
Com_442_neg	4-Hydroxyisoleucine	C6H13NO3	147.172	1.038	Amino Acid And Derivatives	"781658-23-9"	21820000
Com_1146_pos	4-Aminobutyric acid	C4H9NO2	103.12	0.864	Amino Acid And Derivatives	"56-12-2"	20780000
Com_1329_pos	trans-3-Hydroxy-L-proline	C5H9NO3	131.13	2.14	Amino Acid And Derivatives	"4298-08-2"	18250000
Com_360_neg	Dl-Glutamic acid	C5H9NO4	147.129	0.87	Amino Acid And Derivatives	"617-65-2"	16310000
Com_1077_pos	L-aspartic Acid	C4H7NO4	133.1	0.86	Amino Acid And Derivatives	"56-84-8"	16280000
Com_1470_pos	N-Acetyl-L-leucine	C8H15NO3	173.21	1.04	Amino Acid And Derivatives	"1188-21-2"	14600000
Com_1031_pos	Pipecolic acid	C6H11NO2	129.16	1.042	Amino Acid And Derivatives	"535-75-1"	13420000
Com_1130_pos	beta-Alanine methyl ester hydrochloride	C4H10ClNO2	139.58	0.98	Amino Acid And Derivatives	"3196-73-4"	12660000
Com_1613_pos	Leucine	C6H13NO2	131.175	2.1	Amino Acid And Derivatives	"26782-71-8"	12150000
Com_1005_pos	Glutamine	C5H10N2O3	146.145	0.81	Amino Acid And Derivatives	"585-21-7"	12040000
Com_1377_pos	L-lysine	C6H14N2O2	146.19	0.74	Amino Acid And Derivatives	"56-87-1"	11040000
Com_996_pos	Dl-Alanyl-glycine	C5H10N2O3	146.144	0.84	Amino Acid And Derivatives	"1188-01-8"	10820000
Com_872_pos	Aspartic Acid	C4H7NO4	133.103	0.84	Amino Acid And Derivatives	"6899-03-2"	10240000
Com_880_pos	Homoserine	C4H9NO3	119.119	0.9	Amino Acid And Derivatives	"1927-25-9"	9260000
Com_1332_pos	4-Acetamidobutyric Acid	C6H11NO3	145.156	1.03	Amino Acid And Derivatives	"3025-96-5"	9248000
Com_934_pos	Dl-3-Hydroxynorvaline	C5H11NO3	133.146	0.85	Amino Acid And Derivatives	"2280-42-4"	8857000
Com_1268_pos	H-Abu-OH	C4H9NO2	103.12	0.947	Amino Acid And Derivatives	"1492-24-6"	8673000
Com_666_neg	N alpha-Acetyl-L-glutamine	C7H12N2O4	188.08	7.4	Amino Acid And Derivatives	"2490-97-3"	7923000
Com_1376_pos	DL-Glutamine	C5H10N2O3	146.14	0.84	Amino Acid And Derivatives	"6899-04-3"	7718000
Com_1082_pos	L-arginine	C6H14N4O2	174.2	0.794	Amino Acid And Derivatives	"74-79-3"	7280000
Com_1150_pos	D-glutamine	C5H10N2O3	146.14	0.86	Amino Acid And Derivatives	"5959-95-5"	7217000
Com_878_pos	Histidine	C6H9N3O2	155.15	0.81	Amino Acid And Derivatives	"4998-57-6"	7189000
Com_1580_pos	Lysine	C6H14N2O2	146.188	0.85	Amino Acid And Derivatives	"70-54-2"	6939000
Com_364_neg	alpha-Amino-beta-(3-indolyl)-propionic acid	C11H12N2O2	204.225	4.91	Amino Acid And Derivatives	"54-12-6"	6828000
Com_1063_pos	2-Aminoadipic acid	C6H11NO4	161.1	0.95	Amino Acid And Derivatives	"1118-90-7"	6492000
Com_184_neg	D-Panthotenate	C9H17NO5	219.235	4.59	Amino Acid And Derivatives	"79-83-4"	6275000
Com_838_pos	Sarcosine	C3H7NO2	89.093	0.9	Amino Acid And Derivatives	"107-97-1"	6210000
Com_1160_pos	D-Proline betaine	C7H14NO2+	144.092	1	Amino acids and derivatives	"1195-94-4"	5443000
Com_262_neg	carbamaoyl asparatate			1.07	Amino Acid And Derivatives		5170000
Com_1000_pos	DL-Leucine	C6H13NO2	131.173	2.3	Amino Acid And Derivatives	"328-39-2"	5041000
Com_600_neg	L-Asparagine	C4H8N2O3	132.12	0.843	Amino Acid And Derivatives	"70-47-3"	4542000
Com_232_neg	Ureidosuccinic acid	C5H8N2O5	176.13	1.031	Amino Acid And Derivatives	"923-37-5"	4529000
Com_1293_pos	1-Methylpiperidine-2-carboxylic acid	C7H13NO2	143.095	0.99	Amino acids and derivatives	"7730-87-2"	4521000
Com_1544_pos	Nicotianamine	C12H21N3O6	303.312	0.86	Amino Acid And Derivatives	"34441-14-0"	4267000
Com_1080_pos	L-Hydroxyproline	C5H9NO3	131.13	0.88	Amino Acid And Derivatives	"51-35-4"	4259000
Com_1076_pos	L-Alanine	C3H7NO2	89.09	0.86	Amino Acid And Derivatives	"56-41-7"	4246000
Com_328_neg	D-2-Hydroxypentanedioic acid	C5H6Na2O5	192.078	1.49	Amino Acid And Derivatives	"103404-90-6"	4153000
Com_1272_pos	N-Methyl-Trans-4-Hydroxy-L-Proline	C6H11NO3	145.074	0.91	Amino acids and derivatives	"4252-82-8"	4044000
Com_460_neg	Fmoc-Ile-OH	C21H23NO4	353.418	7.71	Amino Acid And Derivatives	"71989-23-6"	3820000
Com_1138_pos	N-Hydroxy-L-tryptophan	C11H12N2O3	220.225	2.66	Amino Acid And Derivatives	"87843-31-0"	3343000
Com_1203_pos	L-Dihydroorotic acid	C5H6N2O4	158.112	0.92	Amino Acid And Derivatives	"5988-19-2"	3267000
Com_1472_pos	N-Acetyl-Dl-glutamic acid	C7H11NO5	189.166	1.84	Amino Acid And Derivatives	"5817-08-3"	3034000
Com_1264_pos	3-Amino-2-methylpropanoic acid	C4H9NO2	103.12	0.931	Amino Acid And Derivatives	"144-90-1"	2880000
Com_1197_pos	D-Serine	C3H7NO3	105.09	0.851	Amino Acid And Derivatives	"312-84-5"	2861000
Com_1493_pos	Dl-2-Aminooctanoic Acid	C8H17NO2	159.226	1.23	Amino Acid And Derivatives	"644-90-6"	2708000
Com_1343_pos	Stachydrine	C7H13NO2	143.18	1.008	Amino Acid And Derivatives	"471-87-4"	2690000
Com_285_neg	2-Amino-3-hydroxypropionic acid	C3H7NO3	105.09	0.83	Amino Acid And Derivatives	"302-84-1"	2606000
Com_508_neg	N-Acetyl-L-glutamic acid	C7H11NO5	189.166	1.81	Amino Acid And Derivatives	"1188-37-0"	2393000
Com_950_pos	N-Acetyl-L-valine	C7H13NO3	159.183	0.96	Amino Acid And Derivatives	"96-81-1"	2298000
Com_1198_pos	L-Leucyl-L-alanine	C9H18N2O3	202.25	3	Amino Acid And Derivatives	"7298-84-2"	2263000
Com_1078_pos	DL-Citrulline	C6H13N3O3	175.19	0.9	Amino Acid And Derivatives	"627-77-0"	2069000
Com_602_neg	L-Glutamine	C5H10N2O3	146.14	0.868	Amino Acid And Derivatives	"56-85-9"	2021000
Com_1241_pos	Lysine butyrate	C10H22N2O4	234.1	0.89	Amino Acid And Derivatives	"80407-71-2"	1909000
Com_597_neg	L-Threonine	C4H9NO3	119.119	0.888	Amino Acid And Derivatives	"72-19-5"	1863000
Com_1115_pos	Phosphocreatine	C4H10N3O5P	211.113	2.5	Amino Acid And Derivatives	"67-07-2"	1772000
Com_473_neg	Creatine	C4H9N3O2	131.133	1.95	Amino Acid And Derivatives	"57-00-1"	1765000
Com_1569_pos	D-Asparagine	C4H8N2O3	132.118	0.96	Amino Acid And Derivatives	"2058-58-4"	1692000
Com_1154_pos	L-Theanine	C7H14N2O3	174.2	1.49	Amino Acid And Derivatives	"3081-61-6"	1636000
Com_1216_pos	L-2-Aminoadipic acid	C6H11NO4	161.069	0.93	Amino acids and derivatives	"542-32-5"	1613000
Com_810_pos	L-Alanyl-L-leucine	C9H18N2O3	202.251	4.45	Amino Acid And Derivatives	"3303-34-2"	1484000
Com_1206_pos	D-Threonine	C4H9NO3	119.119	0.86	Amino Acid And Derivatives	"632-20-2"	1426000
Com_335_neg	L-Pyroglutamic acid	C5H7NO3	129.11	1.689	Amino Acid And Derivatives	"98-79-3"	1237000
Com_371_neg	Aminomalonic acid	C3H5NO4	119.022	0.88	Amino Acid And Derivatives	"1068-84-4"	1178000
Com_1033_pos	L-Pipecolate	C6H11NO2	129.16	1.049	Amino Acid And Derivatives	"3105-95-1"	1164000
Com_1227_pos	L-Valine	C5H11NO2	117.146	1.2	Amino Acid And Derivatives	"72-18-4"	1164000
Com_186_neg	N-Acetyl-L-aspartate	C6H9NO5	175.139	1.65	Amino Acid And Derivatives	"997-55-7"	1150000
Com_1330_pos	Val-Ser	C8H16N2O4	204.224	1.01	Amino Acid And Derivatives	"13588-94-8"	1136000
Com_1338_pos	(-)-3-(3,4-Dihydroxyphenyl)-2-methylalanine	C10H13NO4	211.214	4.61	Amino Acid And Derivatives	"555-30-6"	1090000
Com_363_neg	DL-o-Tyrosine	C9H11NO3	181.189	1.81	Amino Acid And Derivatives	"2370-61-8"	1078000
Com_1105_pos	3-Hydroxy-3-Methylpentane-1,5-Dioic Acid	C6H10O5	162.141	5.9	Amino Acid And Derivatives	"503-49-1"	1038000
Com_935_pos	D-Homocysteine	C4H9NO2S	135.185	1.86	Amino Acid And Derivatives	"454-28-4"	1011000
Com_1151_pos	L-Citrulline	C6H13N3O3	175.19	0.89	Amino Acid And Derivatives	"372-75-8"	999400
Com_1220_pos	L-Leucyl-L-phenylalanine	C15H22N2O3	278.163	6.25	Amino acids and derivatives	"56217-82-4"	914700
Com_1262_pos	Nepsilon-Acetyl-L-lysine	C8H16N2O3	188.22	1.304	Amino Acid And Derivatives	"692-04-6"	912900
Com_933_pos	L-Hydroxylysine	C6H14N2O3	163.195	0.9	Amino Acid And Derivatives	"1190-94-9"	896100
Com_873_pos	Ala-gly	C5H10N2O3	146.144	0.84	Amino Acid And Derivatives	"687-69-4"	876000
Com_1547_pos	NG,NG-Dimethyl-L-arginine	C8H20Cl2N4O2	202.254	0.93	Amino Acid And Derivatives	"220805-22-1"	842300
Com_845_pos	Nε,Nε,Nε-trimethyllysine	C9H20N2O2	188.267	0.76	Amino Acid And Derivatives	"19253-88-4"	827100
Com_1252_pos	Alanine	C3H7NO2	89.094	0.86	Amino Acid And Derivatives	"338-69-2"	826000
Com_574_neg	L-Proline	C5H9NO2	115.131	0.94	Amino Acid And Derivatives	"147-85-3"	772800
Com_1418_pos	SDMA	C8H18N4O2	202.25	0.913	Amino Acid And Derivatives	"30344-00-4"	757300
Com_740_neg	O-Phospho-L-serine	C3H8NO6P	185.072	1.03	Amino Acid And Derivatives	"407-41-0"	732100
Com_151_neg	N-Acetylalanine	C5H9NO3	131.13	2.15	Amino Acid And Derivatives	"97-69-8"	725700
Com_1071_pos	N alpha-Acetyl-L-Arginine	C8H16N4O3	216.238	1.04	Amino Acid And Derivatives	"155-84-0"	704300
Com_922_pos	N-Acetylthreonine	C6H11NO4	161.069	1.73	Amino Acid And Derivatives	"17093-74-2"	692300
Com_1540_pos	O-Acetyl-L-homoserine	C6H11NO4	197.617	1	Amino Acid And Derivatives	"250736-84-6"	654500
Com_1025_pos	1-Methylhistidine	C7H11N3O2	169.18	0.84	Amino Acid And Derivatives	"332-80-9"	628900
Com_63_neg	2,3-Dimethylsuccinic acid	C6H8O4	144.042	4.53	Amino acids and derivatives	"13545-04-5"	594200
Com_1029_pos	Trimethyllysine	C9H21N2O2	189.275	1.03	Amino Acid And Derivatives	"66989-56-8"	589200
Com_1204_pos	beta-Alanine	C3H7NO2	89.093	0.8	Amino Acid And Derivatives	"107-95-9"	585400
Com_1088_pos	L-Alanyl-L-Phenylalanine	C12H16N2O3	236.116	4.65	Amino acids and derivatives	"3061-90-3"	571400
Com_1024_pos	S-ribosyl-L-homocysteine	C9H17NO6S	267.3	0.91	Amino Acid And Derivatives		569700
Com_1483_pos	(5-L-Glutamyl)-L-amino acid	C8H14N2O5	218.09	1.01	Amino Acid And Derivatives	"5875-41-2"	539500
Com_956_pos	6-Aminohexanoic acid	C6H13NO2	131.173	2.1	Amino Acid And Derivatives	"1319-82-0"	528000
Com_542_neg	3-(2-Naphthyl)-L-alanine	C13H13NO2	215.095	6.07	Amino acids and derivatives	"58438-03-2"	525100
Com_1657_pos	(-)-N-[3',4'-Dihydroxy-(E)-cinnamoyl]-L-glutamic acid	C14H15N1O7	309.271	16.07	Amino Acid And Derivatives	"860295-23-4"	520600
Com_1444_pos	Phe-Pro	C14H18N2O3	262.304	5.58	Amino Acid And Derivatives	"7669-65-0"	500800
Com_761_neg	5-oxoproline	C5H7NO3	129.043	1.63	Amino Acid And Derivatives	"149-87-1"	499800
Com_575_neg	Ala-Gln	C8H15N3O4	217.22	0.85	Amino Acid And Derivatives	"39537-23-0"	489700
Com_812_pos	L-Saccharopine	C11H20N2O6	276.286	1.03	Amino Acid And Derivatives	"997-68-2"	478600
Com_1679_pos	Levodopa	C9H11NO4	197.19	1.019	Amino Acid And Derivatives	"59-92-7"	465400
Com_1035_pos	5-Methyltryptamine	C11H14N2	174.242	8.51	Amino Acid And Derivatives	"1821-47-2"	434600
Com_1690_pos	5-Methyl-dl-tryptophan	C12H14N2O2	218.252	1.06	Amino Acid And Derivatives	"951-55-3"	394100
Com_1075_pos	Glycyl-L-leucine	C8H16N2O3	188.22	4.466	Amino Acid And Derivatives	"869-19-2"	389000
Com_47_neg	Phenprobamate	C10H13NO2	179.216	4.09	Amino Acid And Derivatives	"673-31-4"	379500
Com_1012_pos	L-Glycyl-L-phenylalanine	C11H14N2O3	222.1	4.97	Amino acids and derivatives	"721-66-4"	367600
Com_33_neg	3-(2-Naphthyl)-D-Alanine	C13H13NO2	215.248	6.22	Amino Acid And Derivatives	"76985-09-6"	336500
Com_879_pos	Homocysteic acid	C4H9NO5S	183.18	1.83	Amino Acid And Derivatives	"1001-13-4"	336400
Com_1153_pos	L-Ornithine	C5H12N2O2	132.16	0.762	Amino Acid And Derivatives	"70-26-8"	328500
Com_877_pos	glutathione disulfide	C20H32N6O12S2	612.631	1.81	Amino Acid And Derivatives	"27025-41-8"	321200
Com_465_neg	D-Glutamic acid	C5H9NO4	147.129	2.31	Amino Acid And Derivatives	"6893-26-1"	304000
Com_1482_pos	Methionine sulfoxide	C5H11NO3S	165.046	0.75	Amino Acid And Derivatives	"62697-73-8"	291700
Com_1214_pos	L-serine	C3H7NO3	105.093	0.846	Amino Acid And Derivatives	"56-45-1"	289400
Com_780_neg	N-Acetyl-L-Tryptophan	C13H14N2O3	246.1	6.72	Amino acids and derivatives	"1218-34-4"	257200
Com_1368_pos	Oxidized glutathione	C20H32N6O12S2	630.646	1.06	Amino Acid And Derivatives	"121-24-4"	256400
Com_1381_pos	Phe-Phe	C18H20N2O3	312.363	6.51	Amino Acid And Derivatives	"2577-40-4"	254100
Com_875_pos	Gly-Phe	C11H14N2O3	222.24	4.88	Amino Acid And Derivatives	"3321-03-7"	250500
Com_1261_pos	3-Chloro-L-tyrosine	C9H10ClNO3	215.63	4.071	Amino Acid And Derivatives	"7423-93-0"	247600
Com_200_neg	Acetyl tryptophan	C13H14N2O3	246	6.78	Amino Acid And Derivatives	"2280-01-5"	245200
Com_932_pos	Asp-glu	C9H14N2O7	262.217	0.96	Amino Acid And Derivatives	"6157-06-8"	242000
Com_1265_pos	H-Gly-Pro-OH	C7H12N2O3	172.18	1.035	Amino Acid And Derivatives	"704-15-4"	232900
Com_8_neg	L-Histidine	C6H9N3O2	155.15	0.76	Amino Acid And Derivatives	"71-00-1"	231100
Com_1027_pos	gamma-Glutamylglutamic acid	C10H16N2O7	276.243	1.05	Amino Acid And Derivatives	"1116-22-9"	225200
Com_1457_pos	gamma-Glu-Leu	C11H20N2O5	260.287	5.17	Amino Acid And Derivatives	"2566-39-4"	213400
Com_900_pos	N-Methyl-L-arginine hydrochloride	C7H17ClN4O2	224.688	0.95	Amino Acid And Derivatives	"156706-47-7"	203900
Com_1598_pos	D-beta-Homophenylalanine	C10H13NO2	179.216	5.41	Amino Acid And Derivatives	"131270-08-1"	201700
Com_1474_pos	N-Acetyl-L-histidine	C8H11N3O3	197.191	1	Amino Acid And Derivatives	"2497-02-1"	184100
Com_1213_pos	2-Amino-4-(methylthio)butyric acid	C5H11NO2S	149.211	1.46	Amino Acid And Derivatives	"59-51-8"	182400
Com_1635_pos	S-Sulfo-L-cysteine	C3H7NO5S2	201.221	0.98	Amino Acid And Derivatives	"1637-71-4"	172100
Com_484_neg	L-Homoserine	C4H9NO3	119.119	1.9	Amino Acid And Derivatives	"672-15-1"	169300
Com_1360_pos	Asp-phe	C13H16N2O5	280.106	5.12	Amino Acid And Derivatives	"13433-09-5"	169200
Com_1065_pos	Aspartic acid di-O-glucoside		457.1	0.97	Amino Acid And Derivatives		165400
Com_441_neg	Allysine	C6H11NO3	145.074	1.11	Amino Acid And Derivatives	"1962-83-0"	152100
Com_951_pos	N-Acetyl-5-hydroxytryptamine	C12H14N2O2	218.252	5.98	Amino Acid And Derivatives	"1210-83-9"	135200
Com_1233_pos	Phenylacetylglutamine	C13H16N2O4	264.277	0.94	Amino Acid And Derivatives	"28047-15-6"	134600
Com_918_pos	Ademetionine	C15H22N6O5S	398.44	0.8	Amino Acid And Derivatives	"29908-03-0"	130300
Com_89_neg	N-Acetyl-Dl-serine	C5H9NO4	147.129	1.03	Amino Acid And Derivatives	"97-14-3"	123400
Com_949_pos	N-Acetylputrescine	C6H14N2O	130.188	0.75	Amino Acid And Derivatives	"18233-70-0"	121400
Com_344_neg	N-Acetylvaline	C7H13NO3	159.183	4.41	Amino Acid And Derivatives	"3067-19-4"	120900
Com_1266_pos	L-Homocitrulline	C7H15N3O3	189.21	0.972	Amino Acid And Derivatives	"1190-49-4"	102300
Com_1600_pos	D-(+)-Octopine	C9H18N4O4	246.264	0.73	Amino Acid And Derivatives	"34522-32-2"	99210
Com_1195_pos	3-Amino-4-methylpentanoic acid	C6H13NO2	131.17	1.862	Amino Acid And Derivatives	"5699-54-7"	94150
Com_274_neg	O-Phospho-L-Tyrosine	C9H12NO6P	261.168	0.94	Amino Acid And Derivatives	"21820-51-9"	93660
Com_264_neg	Ala-trp	C14H17N3O3	275.303	0.9	Amino Acid And Derivatives	"16305-75-2"	89170
Com_948_pos	N-Phenylacetylglycine	C10H11NO3	193.199	6.55	Amino Acid And Derivatives	"500-98-1"	82280
Com_9_neg	O-Acetylserine	C5H9NO4	147.13	1.056	Amino Acid And Derivatives	"5147-00-2"	81720
Com_356_neg	D-Histidine	C6H9N3O2	155.155	0.81	Amino Acid And Derivatives	"351-50-8"	75550
Com_345_neg	N-Acetylphenylalanine	C11H13NO3	207.226	6.82	Amino Acid And Derivatives	"2018-61-3"	67540
Com_1631_pos	S-Adenosyl-L-homocysteine	C14H20N6O5S	384.411	1.84	Amino Acid And Derivatives	"979-92-0"	67450
Com_1447_pos	N-Hydroxyl-tryptamine	C10H12N2O	176.215	0.88	Amino Acid And Derivatives	"4761-34-6"	56280
Com_876_pos	Gly-Tyr	C11H14N2O4	238.24	3.09	Amino Acid And Derivatives	"658-79-7"	55990
Com_1632_pos	Homocysteine	C4H9NO2S	135.185	0.84	Amino Acid And Derivatives	"454-29-5"	55670
Com_902_pos	4-Methylaminobutyrate	C5H11NO2	117.07	0.92	Amino acids and derivatives	"1119-48-8"	46590
Com_152_neg	N-Acetyl-Asp-Glu	C11H16N2O8	304.253	2.02	Amino Acid And Derivatives	"3106-85-2"	42530
Com_1350_pos	Leucine derivative			5.56	Amino Acid And Derivatives		40990
Com_898_pos	Nε-(1-Carboxymethyl)-L-lysine	C8H16N2O4	204.224	0.84	Amino Acid And Derivatives	"5746-04-3"	39470
Com_1369_pos	Glu-Glu	C10H14N2O7	276.243	0.99	Amino Acid And Derivatives	"3929-61-1"	38830
Com_1491_pos	DL-threo-beta-Methylaspartic acid	C5H9NO4	147.129	0.89	Amino Acid And Derivatives		38710
Com_758_neg	3-N-Methyl-L-histidine	C7H11N3O2	169.181	0.85	Amino Acid And Derivatives	"368-16-1"	31190
Com_1388_pos	Viscumamide	C30H55N5O5	565.79	6.83	Amino Acid And Derivatives		30660
Com_1093_pos	Cyclo(Tyr-Ala)	C12H14N2O3	234.1	0.97	Amino acids and derivatives	"21754-26-7"	30120
Com_1599_pos	D-Ala-D-Ala	C6H12N2O3	160.171	0.94	Amino Acid And Derivatives	"923-16-0"	27530
Com_814_pos	L-Methionine Methyl Ester	C6H14ClNO2S	199.699	0.95	Amino Acid And Derivatives	"2491-18-1"	27490
Com_890_pos	N-(Phenylacetyl)-L-phenylalanine	C17H17NO3	283.322	4.09	Amino Acid And Derivatives	"738-75-0"	26670
Com_1004_pos	Ergothioneine	C9H15N3O2S	229.299	1.03	Amino Acid And Derivatives	"497-30-3"	26370
Com_753_neg	S-Methylglutathione	C11H19N3O6S	321.1	1.12	Amino Acid And Derivatives	"2922-56-7"	24070
Com_282_neg	Azetidine-2-carboxylic acid	C4H7NO2	101.1	0.86	Amino Acid And Derivatives	"2517-04-6"	23430
Com_772_neg	Guanidineacetic acid	C3H7N3O2	117.054	1.13	Amino Acid And Derivatives	"352-97-6"	18750
Com_230_neg	H-HoArg-OH	C7H16N4O2	188.23	0.807	Amino Acid And Derivatives	"156-86-5"	17390
Com_444_neg	L-Cycloserine	C3H6N2O2	102.09	0.8	Amino Acid And Derivatives	"339-72-0"	16630
Com_1500_pos	Neotame	C20H30N2O5	378.469	5.56	Amino Acid And Derivatives	"165450-17-9"	9130
Com_1145_pos	Glycine	C2H5NO2	75.07	0.88	Amino Acid And Derivatives	"56-40-6"	8060
Com_815_pos	L-Cystathionine	C7H14N2O4S	222.262	0.84	Amino Acid And Derivatives	"56-88-2"	7368
Com_985_pos	Cinnamoyl tyramine	C17H17NO2	267	17.3	Amino Acid And Derivatives		6212
Com_767_neg	L-Allo-Isoleucine	C6H13NO2	131.173	15.45	Amino Acid And Derivatives	"1509-34-8"	5261
Com_947_pos	Histamine	C5H9N3	111.145	1.04	Amines	"51-45-6"	61450000
Com_986_pos	Histidinol	C6H11N3O	141.1	0.72	Amines	"4836-52-6"	4036000
Com_1292_pos	Phenylethanolamine	C8H11NO	137.084	2	Amines	"7568-93-6"	2585000
Com_1366_pos	2-Phenylethylamine	C8H11N	121.18	4.584	Amines	"64-04-0"	2263000
Com_7_neg	Choline bitartrate	C9H19NO7	253.25	0.97	Amines	"87-67-2"	1706000
Com_997_pos	Dl-Dihydrosphingosine	C18H39NO2	301.508	10.41	Amines	"3102-56-5"	1454000
Com_839_pos	Spermidine	C7H19N3	145.246	0.68	Amines	"124-20-9"	1354000
Com_1018_pos	N', N''-p-Coumaroyl, Feruloylspermidine	C26H33N3O5	467.56	6.5	Amines		368400
Com_953_pos	N1-Acetylspermine	C12H28N4O	244.377	0.88	Amines	"25593-72-0"	367000
Com_1550_pos	Methylguanidine	C2H7N3	73.0971	0.84	Amines	"471-29-4"	365200
Com_1634_pos	Spermidine derivative	C8H21N3O6	255.27	14.85	Amines		355000
Com_827_pos	Putrescine	C4H12N2	88.1	0.68	Amines	"110-60-1"	352000
Com_824_pos	N',N'',N'''-Tri-p-cinnamoylagmatine			5.89	Amines		324100
Com_1013_pos	Cyclen	C8H20N4	172.27	0.71	Amines	"294-90-6"	299700
Com_1166_pos	(S)-(+)-2-(anilinomethyl) pyrrolidine	C11H16N2	176.258	6.48	Amines	"64030-44-0"	246100
Com_1231_pos	Auramine O	C17H21N3	267.374	13.59	Amines	"2465-27-2"	135300
Com_893_pos	N',N'',N'''-Di-p-coumaroyl, p-hydroxybenxoylagmatine			12.92	Amines		132200
Com_1020_pos	N,N-Dimethyl-1,4-phenylenediamine	C8H12N2	136.194	4.43	Amines	"99-98-9"	130200
Com_901_pos	Oleoylethanolamide	C20H39NO2	325.298	14.61	Amines	"111-58-0"	87330
Com_1097_pos	Diethanolamine	C4H11NO2	105.136	0.84	Amines	"111-42-2"	82800
Com_1036_pos	5-Sulfanyl-1-pentanesulfonamide	C5H13NO2S2	183.29	15.17	Amines		75300
Com_976_pos	Agmatine	C5H14N4	130.1	0.92	Amines	"306-60-5"	72320
Com_825_pos	N', N''-Caffeoyl, p-cinnamoylputrescine			1.32	Amines		47830
Com_1017_pos	N', N''-Feruloyl, Caffeoylspermidine	C26H33N3O6	483.56	6.2	Amines		34160
Com_1630_pos	Trimethylamine N-oxide	C3H9NO	75.11	0.85	Amines	"1184-78-7"	29680
Com_1542_pos	N-Lauryldiethanolamine	C16H35NO2	273.455	9.62	Amines	"1541-67-9"	28590
Com_823_pos	N', N''-Caffeoyl, feruloylputrescine			0.98	Amines		26940
Com_1015_pos	N', N''-Di-p-hydroxybenxoylputrescine			1.15	Amines		25090
Com_826_pos	N',N'',N'''-Di-p-hydroxybenxoyl, feruloylagmatine			6.7	Amines		22660
Com_829_pos	1,5-Diaminopentane	C5H14N2	102.116	0.83	Amines	"462-94-2"	18370
Com_1028_pos	4-D-Hydroxysphinganine	C18H39NO3	317.507	9.54	Amines	"554-62-1"	12850
Com_1023_pos	N', N''-p-hydroxybenxoyl,sinapoylcadaverine			0.81	Amines		5154
Com_892_pos	N',N'',N'''-DiFeruloyl,Sinapoylspermidine			12.99	Amines		4859
Com_992_pos	Caffeic aldehyde	C9H8O3	164.1	1.84	Phenylpropanoids and polyketides		12610000
Com_1435_pos	Dihydrokavain	C14H16O3	232.275	10.262	Phenylpropanoids and polyketides	"587-63-3"	3179000
Com_661_neg	3,4-Dihydroxyhydrocinnamic acid	C9H10O4	182.17	5.64	Phenylpropanoids and polyketides	"1078-61-1"	1969000
Com_42_neg	3-Phenyllactic acid	C9H10O3	166.174	6.81	Phenylpropanoids and polyketides	"828-01-3"	1331000
Com_477_neg	E-3,4,5'-Trihydroxy-3'-glucopyranosylstilbene	C20H22O9	406.4	6.23	Phenylpropanoids and polyketides	"29884-49-9"	1305000
Com_1445_pos	p-Coumaraldehyde	C9H8O2	148.159	0.89	Phenylpropanoids and polyketides	"2538-87-6"	1022000
Com_778_neg	Bisdemethoxycurcumin	C19H16O4	308.328	6.53	Phenylpropanoids and polyketides	"33171-05-0"	694100
Com_522_neg	Sodium Danshensu	C9H9NaO5	220.15	4.44	Phenylpropanoids and polyketides	"67920-52-9"	408600
Com_613_neg	Hydroumbellic acid	C9H10O4	182.17	6.14	Phenylpropanoids and polyketides	"5631-68-5"	305200
Com_466_neg	Icariside E5	C26H34O11	522.21	6.56	Phenylpropanoids and polyketides	"126176-79-2"	246100
Com_273_neg	P-Coumaryl Alcohol	C9H10O2	150.174	1.04	Phenylpropanoids and polyketides	"3690-05-9"	197000
Com_503_neg	Rhapontin	C21H24O9	420.41	6.94	Phenylpropanoids and polyketides	"155-58-8"	173800
Com_1344_pos	Vanillactic acid	C10H12O5	212.199	9.2	Phenylpropanoids and polyketides	"2475-56-1"	53780
Com_726_neg	Hydroferulic acid	C10H12O4	196.2	6.74	Phenylpropanoids and polyketides	"1135-23-5"	49830
Com_168_neg	Rhapontigenin 3'-O-glucoside	C21H24O9	420.416	7.31	Phenylpropanoids and polyketides	"94356-22-6"	35480
Com_1254_pos	Alnustone	C19H18O	262.346	13.21	Phenylpropanoids and polyketides	"33457-62-4"	14570
Com_525_neg	Piceatannol	C14H12O4	244.24	6.987	Phenylpropanoids and polyketides	"10083-24-6"	5467
Com_748_neg	Rhapontigenin	C15H14O4	258.269	8.04	Phenylpropanoids and polyketides	"500-65-2"	2788
Com_1562_pos	Schisandrin A	C24H32O6	416.51	13.79	Phenylpropanoids	"61281-38-7"	4768000
Com_1069_pos	Schisandrin B	C23H28O6	400.46	14.09	Phenylpropanoids	"61281-37-6"	3823000
Com_16_neg	Fraxin	C16H18O10	370.313	5.68	Phenylpropanoids	"524-30-1"	1755000
Com_118_neg	Calceolarioside B	C23H26O11	478.446	6.67	Phenylpropanoids	"105471-98-5"	1051000
Com_921_pos	Scopolin	C16H18O9	354.096	5.51	Phenylpropanoids	"531-44-2"	922900
Com_81_neg	Methyl 4-hydroxycinnamate	C10H10O3	178.18	8.76	Phenylpropanoids	"19367-38-5"	405300
Com_1561_pos	Schizandrol A	C24H32O7	432.51	10.977	Phenylpropanoids	"7432-28-2"	249600
Com_850_pos	Nodakenin	C20H24O9	408.399	6.909	Phenylpropanoids	"495-31-8"	213700
Com_159_neg	Forsythoside A	C29H36O15	624.587	6.46	Phenylpropanoids	"79916-77-1"	188400
Com_1434_pos	columbianetin acetate	C16H16O5	288.3	5.19	Phenylpropanoids	"23180-65-6"	178500
Com_1645_pos	Schisandrin C	C22H24O6	384.422	14.267	Phenylpropanoids	"61301-33-5"	91870
Com_1503_pos	Oxypeucedanin hydrate	C16H16O6	304.299	8.29	Phenylpropanoids	"2643-85-8"	57570
Com_1673_pos	Schisanhenol	C23H30O6	402.481	12.89	Phenylpropanoids	"69363-14-0"	54790
Com_116_neg	Isoscopoletin	C10H8O4	192.168	6.759	Phenylpropanoids	"776-86-3"	36090
Com_930_pos	Praeruptorin C	C24H28O7	428.475	14.09	Phenylpropanoids	"83382-71-2"	12290
Com_747_neg	Forsythoside B	C34H44O19	756.702	6.3	Phenylpropanoids	"81525-13-5"	11980
Com_961_pos	Schisantherin B	C28H34O9	514.564	12.669	Phenylpropanoids	"58546-55-7"	9134
Com_1164_pos	Benzamidine	C7H8N2	120.152	4.09	Benzene and substituted derivatives	"618-39-3"	17260000
Com_71_neg	Sulfosalicylic acid	C7H6O6S	218.184	1.66	Benzene and substituted derivatives	"97-05-2"	9919000
Com_1518_pos	Sattabacin	C13H18O2	206.28	6.12	Benzene and substituted derivatives	"169272-84-8"	6285000
Com_1156_pos	(S)-2-Phenyloxirane	C8H8O	120.058	2.01	Benzene and substituted derivatives	"20780-54-5"	4054000
Com_888_pos	6-Paradol	C17H26O3	278.39	12.85	Benzene and substituted derivatives	"27113-22-0"	2029000
Com_701_neg	4-Ethylphenol	C8H10O	122.16	7.42	Benzene and substituted derivatives	"123-07-9"	1601000
Com_195_neg	Cinnamyl acetate	C11H12O2	176.21	0.89	Benzene and substituted derivatives	"103-54-8"	1299000
Com_705_neg	Catechol	C6H6O2	110.11	5.29	Benzene and substituted derivatives	"120-80-9"	805300
Com_1347_pos	Tyramine	C8H11NO	137.179	2	Benzene and substituted derivatives	"51-67-2"	578800
Com_1052_pos	Benzamide	C7H7NO	121	4.56	Benzene and substituted derivatives	"55-21-0"	547100
Com_417_neg	Shogaol	C17H24O3	276.371	12.09	Benzene and substituted derivatives	"555-66-8"	543200
Com_1442_pos	p-Nitroaniline	C6H6N2O2	138.124	2.02	Benzene and substituted derivatives	"100-01-6"	466500
Com_671_neg	(R)-Mandelic acid	C8H8O3	152.147	5.661	Benzene and substituted derivatives	"611-71-2"	246000
Com_1650_pos	Erianin	C18H22O5	318.364	10.625	Benzene and substituted derivatives	"95041-90-0"	136300
Com_657_neg	Vanillyl Alcohol	C8H10O3	154.16	5.27	Benzene and substituted derivatives	"498-00-0"	121100
Com_593_neg	4-Hydroxy-3-methoxyphenylglycol sulfate potassium salt	C9H11KO7S	302.343	0.92	Benzene and substituted derivatives	"71324-20-4"	77380
Com_958_pos	Sibutramine	C17H26ClN	279.848	12.68	Benzene and substituted derivatives	"106650-56-0"	42450
Com_1431_pos	4-Dimethylaminobenzaldehyde	C9H11NO	149.193	1.02	Benzene and substituted derivatives	"100-10-7"	41800
Com_807_neg	Pyrogallol	C6H6O3	126.11	2.787	Benzene and substituted derivatives	"87-66-1"	39360
Com_557_neg	Ethylparaben	C9H10O3	166.17	8.703	Benzene and substituted derivatives	"120-47-8"	31160
Com_1644_pos	Malachite green	C23H25ClN2	364.9	9.1	Benzene and substituted derivatives	"569-64-2"	15870
Com_774_neg	Propylparaben	C10H12O3	180.2	9.67	Benzene and substituted derivatives	"94-13-3"	12460
Com_78_neg	4-Hydroxybenzyl alcohol	C7H8O2	124.14	4.93	Benzene and substituted derivatives	"623-05-2"	9514
Com_533_neg	Parthenocissin A	C28H22O6	454.479	4.97	Benzene and substituted derivatives	"212513-35-4"	5009
Com_1499_pos	Hordenine	C10H15NO	165.23	2.834	Benzene and substituted derivatives	"539-15-1"	4873
Com_463_neg	4-Anisic acid	C8H8O3	152.15	8.22	Benzene and substituted derivatives	"100-09-4"	3840
Com_408_neg	3,5-Dihydroxybenzoic acid	C7H6O4	154.12	4.461	Benzoic acids and derivatives	"99-10-5"	76730000
Com_833_pos	Dibutyl phthalate	C16H22O4	278.152	13.42	Benzoic acids and derivatives	"84-74-2"	31100000
Com_409_neg	2,6-Dihydroxybenzoic acid	C7H6O4	154.12	6.13	Benzoic acids and derivatives	"303-07-1"	29130000
Com_908_pos	Diisobutyl phthalate	C16H22O4	278.152	13.44	Benzoic acids and derivatives	"84-69-5"	24270000
Com_369_neg	2,3-Dihydroxybenzoic acid	C7H6O4	154.027	6.21	Benzoic acids and derivatives	"303-38-8"	13850000
Com_1443_pos	1,2-Benzenedicarboxylic acid	C8H6O4	166.131	4.11	Benzoic acids and derivatives	"88-99-3"	5822000
Com_209_neg	Terephthalic acid	C8H6O4	166.13	5.801	Benzoic acids and derivatives	"100-21-0"	3637000
Com_643_neg	Gallic acid	C7H6O5	170.12	2.84	Benzoic acids and derivatives	"149-91-7"	1613000
Com_1458_pos	4-Hydroxybenzoate	C7H6O3	138.121	4.12	Benzoic acids and derivatives	"99-96-7"	1279000
Com_793_neg	3,4-Dihydroxyphenylacetic acid	C8H8O4	168.15	4.949	Benzoic acids and derivatives	"102-32-9"	655300
Com_531_neg	Gallic acid O-Hexoside		332	4.13	Benzoic acids and derivatives		571200
Com_1662_pos	Homoveratrumic acid	C10H12O4	196.2	7.137	Benzoic acids and derivatives	"93-40-3"	500100
Com_1589_pos	Methyl Benzoate	C8H8O2	136.148	1.84	Benzoic acids and derivatives	"93-58-3"	456300
Com_518_neg	4-Chloro-2-hydroxybenzoic acid, 4-chloro salicylic acid	C7H5ClO3	172.57	9.167	Benzoic acids and derivatives	"5106-98-9"	403800
Com_1235_pos	p-Aminobenzoate	C7H7NO2	137.136	4.45	Benzoic acids and derivatives	"150-13-0"	365600
Com_559_neg	Benzoic Acid	C7H6O2	122.12	7.497	Benzoic acids and derivatives	"65-85-0"	353600
Com_82_neg	Methyl protocatechuate	C8H8O4	168.15	6.97	Benzoic acids and derivatives	"2150-43-8"	333300
Com_324_neg	Methyl gallate	C8H8O5	100.12	5.523	Benzoic acids and derivatives	"99-24-1"	271700
Com_555_neg	Ethyl gallate	C9H10O5	198.17	6.611	Benzoic acids and derivatives	"831-61-8"	262300
Com_1089_pos	Diisooctyl phthalate	C24H38O4	390.277	16.86	Benzoic acids and derivatives	"27554-26-3"	239600
Com_155_neg	2-(Formylamino)benzoic acid	C8H7NO3	165.043	5.47	Benzoic acids and derivatives	"3342-77-6"	206300
Com_724_neg	Isovanillic acid	C8H8O4	168.15	6.1	Benzoic acids and derivatives	"645-08-9"	178800
Com_1238_pos	4-Hydroxy-3,5-diisopropylbenzaldehyde	C13H18O2	206.2	6.07	Benzoic acids and derivatives	"10537-86-7"	171200
Com_798_neg	Phenylglyoxylic acid	C8H6O3	150.13	4.881	Benzoic acids and derivatives	"611-73-4"	117400
Com_783_neg	Methyl 4-hydroxybenzoate	C8H8O3	152.15	8.26	Benzoic acids and derivatives	"99-76-3"	96400
Com_161_neg	Anthranilate O-hexosyl-O-hexoside		461.1	0.98	Benzoic acids and derivatives		19360
Com_662_neg	Veratric acid	C9H10O4	182.17	7.65	Benzoic acids and derivatives	"93-07-2"	14520
Com_4_neg	Ginkgolic Acid (C13:0)	C20H32O3	320.466	16.196	Benzoic acids and derivatives	"20261-38-5"	9361
Com_158_neg	N-Benzoyl-(2R,3S)-3-phenylisoserine	C16H15NO4	285.295	7.95	Benzoic acids and derivatives	"132201-33-3"	6519
Com_1484_pos	Picolinic acid	C6H5NO2	123.11	1.467	Pyridines and derivatives	"98-98-6"	8562000
Com_1660_pos	(1S,2S)-Nicotine1-oxide	C10H14N2O	178.231	7.41	Pyridines and derivatives	"51095-86-4"	5015000
Com_919_pos	p-Anisaldehyde	C8H8O2	136.15	8.43	Pyridines and derivatives	"123-11-5"	3287000
Com_1039_pos	4-Pyridoxate	C8H9NO4	183.161	2.91	Pyridines and derivatives	"82-82-6"	1523000
Com_911_pos	1,4-dihydro-1-Methyl-4-oxo-3-pyridinecarboxamide	C7H8N2O2	152.059	1.66	Pyridines and derivatives	"769-49-3"	1331000
Com_1106_pos	3-Carbamyl-1-Methylpyridinium Chloride	C7H9ClN2O	172.612	0.98	Pyridines and derivatives	"1005-24-9"	536100
Com_1687_pos	1-Methylnicotinamide	C7H9N2O+	137.159	2.68	Pyridines and derivatives	"3106-60-3"	351700
Com_1337_pos	N-Methylnicotinamide	C7H8N2O	136.151	1.84	Pyridines and derivatives	"114-33-0"	120000
Com_163_neg	1-Indanone	C9H8O	132.16	18.28	Pyridines and derivatives	"83-33-0"	104500
Com_1489_pos	6-Hydroxynicotinic acid	C6H5NO3	139.11	2.908	Pyridines and derivatives	"5006-66-6"	79770
Com_907_pos	Pyridoxamine	C8H12N2O2	168.09	0.8	Pyridines and derivatives	"85-87-0"	33740
Com_1570_pos	Methyl Nicotinate	C7H7NO2	137.14	0.96	Pyridines and derivatives	"93-60-7"	27760
Com_443_neg	Pyridoxal 5-phosphate monohydrate	C8H12NO7P	265.16	1.7	Pyridines and derivatives	"41468-25-1"	9954
Com_2_neg	Naringenin chalcone	C15H12O5	272.253	8.518	Chalcones and dihydrochalcones	"73692-50-9"	1052000
Com_1310_pos	Phloretin	C15H14O5	274.27	8.598	Chalcones and dihydrochalcones	"60-82-2"	537500
Com_88_neg	Butein	C15H12O5	272.069	0.95	Chalcones and dihydrochalcones	"487-52-5"	266800
Com_437_neg	Trilobatin	C21H24O10	436.409	7.523	Chalcones and dihydrochalcones	"4192-90-9"	233300
Com_940_pos	4'-Methoxychalcone	C16H14O2	238.28	11.961	Chalcones and dihydrochalcones	"959-23-9"	191700
Com_669_neg	Xanthohumol	C21H22O5	354.4	11.987	Chalcones and dihydrochalcones	"6754-58-1"	16060
Com_675_neg	Isoliquiritigenin	C15H12O4	256.25	9.231	Chalcones and dihydrochalcones	"961-29-5"	2623
Com_308_neg	Isochlorogenic acid A	C25H24O12	516.451	6.912	Alcohols and polyols	"2450-53-5"	394100000
Com_45_neg	1,5-Dicaffeoylquinic acid	C25H24O12	516.458	6.89	Alcohols and polyols	"30964-13-7"	391100000
Com_808_neg	Quinic acid	C7H12O6	192.17	0.998	Alcohols and polyols	"77-95-2"	346600000
Com_923_pos	1-O-Caffeoyl quinic acid	C16H18O9	354.095	5.43	Alcohols and polyols		233300000
Com_217_neg	Chlorogenic Acid	C16H18O9	354.31	5.37	Alcohols and polyols	"327-97-9"	122100000
Com_367_neg	Cryptochlorogenic acid	C16H18O9	354.309	5.443	Alcohols and polyols	"905-99-7"	117400000
Com_420_neg	Isochlorogenic acid C	C25H24O12	516.451	7.053	Alcohols and polyols	"57378-72-0"	85070000
Com_111_neg	Isochlorogenic acid B	C25H24O12	516.451	6.768	Alcohols and polyols	"14534-61-3"	63800000
Com_243_neg	1-O-p-Coumaroyl quinic acid	C16H18O8	338.1	5.95	Alcohols and polyols		27540000
Com_980_pos	1-O-Feruloyl quinic acid	C17H20O9	368.1	6.23	Alcohols and polyols		16990000
Com_101_neg	Shikimic Acid	C7H10O5	174.15	1.038	Alcohols and polyols	"138-59-0"	4657000
Com_556_neg	Inositol	C6H12O6	180.16	0.85	Alcohols and polyols	"87-89-8"	4421000
Com_720_neg	Licoagroside D	C22H24O10	448.426	11.44	Alcohols and polyols	"464196-55-2"	3783000
Com_1058_pos	Methyl chlorogenate	C17H20O9	368.34	6.24	Alcohols and polyols	"123483-19-2"	2949000
Com_1325_pos	Sequoyitol	C7H14O6	194.182	11.63	Alcohols and polyols	"523-92-2"	2305000
Com_1627_pos	Danshenol C	C21H20O4	336.381	11.396	Alcohols and polyols	"910856-25-6"	1037000
Com_242_neg	3-O-p-coumaroyl quinic acid O-hexoside	C22H28O13	500.2	7.3	Alcohols and polyols		946700
Com_181_neg	5-O-p-coumaroyl quinic acid O-hexoside	C22H28O13	500.1	7.3	Alcohols and polyols		882500
Com_786_neg	2,6-Dimethyl-7-octene-2,3,6-triol	C10H20O3	188.141	7.31	Alcohols and polyols	"73815-21-1"	865700
Com_760_neg	1,5-Anhydro-D-glucitol	C6H12O5	164.069	1	Alcohols and polyols	"154-58-5"	469700
Com_1626_pos	Tanshindiol C	C18H16O5	312.317	8.564	Alcohols and polyols	"97465-71-9"	391300
Com_1409_pos	Arabidopyl shikimic acid	C16H16O9	352.29	13.8	Alcohols and polyols		108000
Com_1567_pos	Sclareol Glycol	C16H30O2	254.413	7.54	Alcohols and polyols	"55881-96-4"	108000
Com_749_neg	3-O-p-coumaroyl shikimic acid O-hexoside	C22H26O12	482.1	5.92	Alcohols and polyols		51050
Com_776_neg	2-Hydroxybenzyl alcohol	C7H8O2	124.14	5.66	Alcohols and polyols	"90-01-7"	29460
Com_1219_pos	Acetylcholine	C7H16NO2	146.118	1.02	Cholines	"60-31-1"	27480000
Com_1048_pos	O-Phosphocholine	C5H15ClNO4P	219.604	0.87	Cholines	"107-73-3"	4837000
Com_1609_pos	1-Decanoyl-2-hydroxy-sn-glycero-3-phosphocholine			6.35	Cholines		208600
Com_1232_pos	Spermine	C10H26N4	202.34	0.71	Polyamine	"71-44-3"	262100
Com_693_neg	Neochlorogenic acid	C16H18O9	354.309	4.879	Polyphenol	"906-33-2"	155700000
Com_1646_pos	Ferulaldehyde	C10H10O3	178.185	7.532	Polyphenol	"458-36-6"	15180000
Com_212_neg	Ferulic Acid	C10H10O4	194.19	6.881	Polyphenol	"1135-24-6"	577300
Com_144_neg	beta-D-glucopyranosyl-caffeic acid			5.29	Polyphenol		230200
Com_482_neg	1-O-b-D-glucopyranosyl sinapate	C17H22O10	386.351	5.88	Polyphenol	"78185-48-5"	218200
Com_165_neg	Anthraquinone-2-carboxylic Acid	C15H8O4	252.222	9.72	Anthracenes	"117-78-2"	29940
Com_302_neg	8-Gingerol	C43H32O20	868.702	1.13	Catechin derivatives	"30462-35-2"	40230
Com_1139_pos	N-Feruloylcadaverine			12.68	Phenolamides		712700
Com_1019_pos	N', N''-DiFeruloylspermidine	C27H35N3O6	497.58	6.5	Phenolamides		541400
Com_1141_pos	N-Caffeoylagmatine	C14H20N4O3	292.33	12.38	Phenolamides		169900
Com_1142_pos	N-Feruloylagmatine	C15H21N4O3	305.35	1.06	Phenolamides		159100
Com_972_pos	N',N",N"'-p-coumaroyl-cinnamoyl-caffeoyl spermidine		583.2	4.95	Phenolamides		146500
Com_1291_pos	Kukoamine A	C28H42N4O6	530.31	0.68	Phenolamine	"75288-96-9"	132000
Com_1280_pos	Salicylamide	C7H7NO2	137.048	0.92	Phenolamine	"65-45-2"	38650
Com_1294_pos	N-Feruloyl-3-methoxytyramine	C19H21NO5	343.142	5.72	Phenolamine	"78510-19-7"	25340
Com_1140_pos	N-Feruloylspermidine	C17H27N3O3	321.41	4.52	Phenolamides		23870
Com_1073_pos	N-Sinapoylagmatine	C16H24N4O4	336.39	12.6	Phenolamides		12440
Com_1137_pos	N-Feruloylspermidine derivative			13.17	Phenolamides		7713
Com_1163_pos	Acetaminophen	C8H9NO2	151.163	2.76	Phenols And Its Derivatives	"103-90-2"	325500000
Com_706_neg	4,5-DCQA Isochlorogenic acid C	C25H24O12	516.458	6.93	Phenols And Its Derivatives	"32451-88-0"	63480000
Com_560_neg	Protocatechuic acid	C7H6O4	154.12	4.571	Phenols And Its Derivatives	"99-50-3"	31370000
Com_1563_pos	6-Gingerol	C17H26O4	294.39	10.748	Phenols And Its Derivatives	"23513-14-6"	4764000
Com_1663_pos	3,4-Dihydroxybenzaldehyde	C7H6O3	138.12	5.306	Phenols And Its Derivatives	"139-85-5"	3651000
Com_65_neg	Sinapic acid-O-glucoside			5.9	Phenols And Its Derivatives		2830000
Com_1335_pos	trans-3,5-Dimethoxy-4-hydroxycinnamaldehyde	C11H12O4	208.211	6.49	Phenols And Its Derivatives	"4206-58-0"	1621000
Com_1638_pos	Sinapoyl O-hexoside	C17H22O10	370.351	5.95	Phenols And Its Derivatives		1029000
Com_1287_pos	Vanillin	C8H8O3	152.147	1.02	Phenols And Its Derivatives	"121-33-5"	517500
Com_1593_pos	Carnosol	C20H26O4	330.418	12.05	Phenols And Its Derivatives	"5957-80-2"	407600
Com_1016_pos	N', N''-DiSinapoylspermidine	C29H39N3O8	557.63	6.3	Phenols And Its Derivatives		333900
Com_203_neg	Androsin	C15H20O8	328.319	4.3	Phenols And Its Derivatives	"531-28-2"	306600
Com_130_neg	Orcinol glucoside	C13H18O7	286.28	9.914	Phenols And Its Derivatives	"21082-33-7"	304300
Com_755_neg	Dl-3,4-Dihydroxymandelic acid	C8H8O5	184.037	2.41	Phenols And Its Derivatives	"775-01-9"	220800
Com_1201_pos	Deoxyarbutin	C11H14O3	194.23	1.23	Phenols And Its Derivatives	"53936-56-4"	181800
Com_21_neg	Sinapyl Alcohol	C11H14O4	210.226	5.92	Phenols And Its Derivatives	"537-33-7"	142600
Com_526_neg	1-O-beta-D-Glucopyranosyl sinapate	C17H22O10	386.1	5.88	Phenols And Its Derivatives		134300
Com_137_neg	Riboflavin-5'-monophosphate	C17H21N4O9P	456.344	0.91	Phenols And Its Derivatives	"146-17-8"	127000
Com_131_neg	Hydroxytyrosol	C8H10O3	154.16	4.731	Phenols And Its Derivatives	"10597-60-1"	79910
Com_1269_pos	Dopamine	C8H11NO2	153.079	1.51	Phenols And Its Derivatives	"51-61-6"	56660
Com_77_neg	Hydroxytyrosol Acetate	C10H12O4	196.2	7.44	Phenols And Its Derivatives	"69039-02-7"	54920
Com_970_pos	Syringaldehyde	C9H10O4	182.17	6.897	Phenols And Its Derivatives	"134-96-3"	34750
Com_564_neg	Guaiacol	C7H8O2	124.137	3.62	Phenols And Its Derivatives	"90-05-1"	30160
Com_679_neg	Orcinol	C7H8O2	124.137	6.054	Phenols And Its Derivatives	"504-15-4"	21850
Com_1498_pos	Synephrine	C9H13NO2	167.21	1.039	Phenols And Its Derivatives	"94-07-5"	19430
Com_390_neg	Isovanillin	C8H8O3	152.15	7.676	Phenols And Its Derivatives	"621-59-0"	17450
Com_66_neg	Sinapaldehyde glucoside	C17H22O9	370.351	1.03	Phenols And Its Derivatives	"154461-65-1"	16770
Com_1173_pos	N-Sinapoyl agmatine			12.67	Phenols And Its Derivatives		12660
Com_110_neg	1-Caffeoylquinic acid	C16H18O9	354.095	5.46	Phenolic acids	"1241-87-8"	468300000
Com_784_neg	3-O-p-Coumaroylquinic acid	C16H18O8	338.1	5.92	Phenolic acids	"87099-71-6"	124000000
Com_769_neg	p-Coumaric acid-4-O-glucoside	C15H18O8	326.1	5.55	Phenolic acids	"117405-48-8"	25600000
Com_24_neg	4-O-p-Coumaroylquinic acid	C16H18O8	338.1	5.93	Phenolic acids	"32451-86-8"	18530000
Com_26_neg	1-O-Gentisoyl-D-glucoside	C13H16O9	316.079	4.56	Phenolic acids	"23445-11-6"	15020000
Com_467_neg	6'-O-Feruloyl-D-sucrose	C22H30O14	518.164	0.69	Phenolic acids	"118230-77-6"	5045000
Com_453_neg	Episalvianolic acid E	C36H30O16	718.624	7.36	Phenolic acids		502200
Com_849_pos	Lithospermic acid	C27H22O12	538.456	7.176	Phenolic acids	"28831-65-4"	320600
Com_539_neg	2-O-Caffeoylmalic acid	C13H12O8	296.053	0.69	Phenolic acids	"53755-04-7"	314800
Com_598_neg	Danshensu	C9H10O5	198.17	4.473	Phenolic acids	"76822-21-4"	218900
Com_247_neg	Koaburaside	C14H20O9	332.111	4.68	Phenolic acids	"41653-73-0"	210400
Com_785_neg	Rosmarinic acid-3'-O-glucoside	C24H26O13	522.137	6.54	Phenolic acids	"910028-78-3"	189600
Com_504_neg	Corilagin	C27H22O18	634.453	5.7	Phenolic acids	"23094-69-1"	124900
Com_683_neg	2,6-Di-tert-butylphenol	C14H22O	206.167	6.04	Phenolic acids	"128-39-2"	70920
Com_782_neg	2,4-Di-Tert-Butylphenol	C14H22O	206.167	6.02	Phenolic acids	"96-76-4"	56600
Com_686_neg	Sibiricose A3	C19H26O13	462.137	5	Phenolic acids	"139726-39-9"	34300
Com_434_neg	Salvianolic acid A	C26H22O10	494.447	7.685	Phenolic acids	"96574-01-5"	23570
Com_427_neg	Methyl salicylate-2-O-glucoside	C14H18O8	314.1	4.8	Phenolic acids	"10019-60-0"	23510
Com_228_neg	Salvianolic acid C	C26H20O10	492.431	8.323	Phenolic acids	"115841-09-3"	6471
Com_640_neg	Salvianolic acid B	C36H30O16	718.61	7.732	Phenolic acids	"121521-90-2"	3016
Com_1571_pos	sn-Glycero-3-phosphocholine	C8H20NO6P	257.22	0.91	Glycerophospholipids	"28319-77-9"	14730000
Com_1217_pos	2-alpha-Linolenoyl-glycerol	C21H36O4	352.261	11.17	Glycerolipids	"55268-58-1"	12800000
Com_1298_pos	MAG (18:3)	C21H36O4	352.2	12.12	Glycerolipids		12460000
Com_990_pos	MAG (18:4)	C21H34O4	350	11.27	Glycerolipids		773400
Com_1215_pos	Monopalmitin	C19H38O4	330.277	13.72	Glycerolipids	"542-44-9"	429700
Com_993_pos	MAG (18:2)	C21H38O4	354.1	14.64	Glycerolipids		183800
Com_1086_pos	2-Linoleoylglycerol	C21H38O4	354.277	0.69	Glycerolipids	"3443-82-1"	140700
Com_1302_pos	MAG (18:1)	C21H40O4	356.2	15.2	Glycerolipids		83850
Com_1303_pos	MGMG (18:2)	C27H48O9	533.4	12.8	Glycerolipids		29820
Com_994_pos	DGMG (18:2)	C33H58O14	695.4	11.8	Glycerolipids		25130
Com_1557_pos	Adenosine	C10H13N5O4	267.24	2.762	Nucleotide And Its Derivates	"58-61-7"	836200000
Com_509_neg	Cyclic AMP	C10H12N5O6P	329.206	1.75	Nucleotide And Its Derivates	"60-92-4"	266200000
Com_353_neg	Uridine 5'-monophosphate	C9H13N2O9P	324.18	1.037	Nucleotide And Its Derivates	"58-97-9"	121600000
Com_1276_pos	Hypoxanthine-9-beta-D-Arabinofuranoside	C10H12N4O5	268.226	2.58	Nucleotide And Its Derivates	"7013-16-3"	115700000
Com_1249_pos	Cytidine	C9H13N3O5	243.22	1.029	Nucleotide And Its Derivates	"65-46-3"	90410000
Com_1469_pos	2'-O-methyladenosine	C11H15N5O4	281.268	4.14	Nucleotide And Its Derivates	"2140-79-6"	34070000
Com_634_neg	UDP	C9H14N2O12P2	404.16	0.7	Nucleotide And Its Derivates	"58-98-0"	27930000
Com_1247_pos	Uridine	C9H12N2O6	244.2	1.86	Nucleotide And Its Derivates	"58-96-8"	27550000
Com_566_neg	GMP	C10H14N5O8P	363.221	0.94	Nucleotide And Its Derivates	"85-32-5"	26390000
Com_1478_pos	Guanosine monophosphate	C10H14N5O8P	363.058	1.01	Nucleotide And Its Derivates		23640000
Com_936_pos	Deoxyadenosine	C10H13N5O3	251.242	2.78	Nucleotide And Its Derivates	"958-09-8"	23390000
Com_1148_pos	Uracil	C4H4N2O2	112.09	1.47	Nucleotide And Its Derivates	"66-22-8"	21690000
Com_1090_pos	5-Aminoimidazole ribonucleotide	C8H14N3O7P	295.056	0.87	Nucleotide And Its Derivates	"25635-88-5"	13540000
Com_1174_pos	2-Methyladenosine	C11H15N5O4	281.268	1.05	Nucleotide And Its Derivates	"16526-56-0"	9498000
Com_1530_pos	dAMP	C10H14N5O6P	331.222	1.47	Nucleotide And Its Derivates	"653-63-4"	6120000
Com_1271_pos	N6-(2-Hydroxyethyl)adenosine	C12H17N5O5	311.123	4.7	Nucleotide And Its Derivates	"4338-48-1"	5705000
Com_1686_pos	2-(Dimethylamino)Guanosine	C12H17N5O5	311.294	4.57	Nucleotide And Its Derivates	"2140-67-2"	5286000
Com_1582_pos	8-Hydroxyguanosine	C10H13N5O6	299.24	3.09	Nucleotide And Its Derivates	"3868-31-3"	5072000
Com_678_neg	Guanosine	C10H13N5O5	283.24	2.772	Nucleotide And Its Derivates	"118-00-3"	4924000
Com_1529_pos	1-Methylguanosine	C11H15N5O5	297.267	4.04	Nucleotide And Its Derivates	"2140-65-0"	4218000
Com_1422_pos	Inosine-5'-monophosphate	C10H13N4O8P	348.206	1.05	Nucleotide And Its Derivates	"21214-07-3"	4196000
Com_871_pos	Adenosine 5'-Diphosphate	C10H15N5O10P2	427.201	1.05	Nucleotide And Its Derivates	"58-64-0"	4057000
Com_1473_pos	N6-Succinyl Adenosine	C14H17N5O8	383.313	4.54	Nucleotide And Its Derivates	"4542-23-8"	3943000
Com_511_neg	Pseudouridine	C9H12N2O6	244.07	1.87	Nucleotide And Its Derivates	"1445-07-4"	3658000
Com_284_neg	Cytidylic acid	C9H14N3O8P	323.2	0.97	Nucleotide And Its Derivates	"63-37-6"	2301000
Com_422_neg	2'-Deoxyguanosine	C10H13N5O4	267.241	3.181	Nucleotide And Its Derivates	"961-07-9"	1693000
Com_267_neg	deoxyribose-phosphate	C5H7O8P	226.08	0.97	Nucleotide And Its Derivates		1685000
Com_874_pos	Allopurinol	C5H4N4O	136.111	2.69	Nucleotide And Its Derivates	"315-30-0"	1635000
Com_580_neg	2,6-Dihydroxypurine	C5H4N4O2	152.11	1.714	Nucleotide And Its Derivates	"69-89-6"	1293000
Com_817_pos	Threonyl carbamoyl adenosine	C15H20N6O8	412.35	5.08	Nucleotide And Its Derivates		1266000
Com_840_pos	S-Methyl-5'-thioadenosine	C11H15N5O3S	297.333	4.94	Nucleotide And Its Derivates		1176000
Com_236_neg	UDP-galactose	C15H22N2Na2O17P2	610.265	0.92	Nucleotide And Its Derivates	"2956-16-3"	1106000
Com_342_neg	Thymidine 5'-diphosphate	C10H16N2O11P2	402.19	0.69	Nucleotide And Its Derivates		1104000
Com_818_pos	Thymine	C5H6N2O2	126.113	2.5	Nucleotide And Its Derivates	"65-71-4"	940900
Com_1487_pos	5-Methylcytidine	C10H15N3O5	257.24	1.036	Nucleotide And Its Derivates	"2140-61-6"	875700
Com_891_pos	N-(9H-Purin-6-ylcarbamoyl)threonine	C10H12N6O4	280.24	14.46	Nucleotide And Its Derivates		817800
Com_480_neg	Orotidine	C10H12N2O8	288.211	1	Nucleotide And Its Derivates	"314-50-1"	811900
Com_957_pos	5'-Deoxy-5'-(Methylthio)Adenosine	C11H15N5O3S	297.333	4.91	Nucleotide And Its Derivates	"2457-80-9"	803800
Com_1391_pos	Xanthurenic acid O-hexoside	C16H17NO9	367.31	4.52	Nucleotide And Its Derivates		690400
Com_1454_pos	dGMP	C10H14N5O7P	347.221	1.04	Nucleotide And Its Derivates	"902-04-5"	687300
Com_339_neg	Cytosine	C4H5N3O	111.1	0.875	Nucleotide And Its Derivates	"71-30-7"	595700
Com_1526_pos	dCMP	C9H14N3O7P	307.197	1.06	Nucleotide And Its Derivates	"1032-65-1"	585500
Com_32_neg	2-deoxyglucose-6-phosphate	C6H13O8P	244.136	0.98	Nucleotide And Its Derivates	"3573-50-0"	572200
Com_1074_pos	5-Methylcytosine	C5H7N3O	125.13	0.991	Nucleotide And Its Derivates	"554-01-8"	571900
Com_529_neg	UDP-D-glucose	C15H24N2O17P2	566.1	0.95	Nucleotide And Its Derivates	"133-89-1"	562800
Com_1087_pos	2'-Deoxyinosine 5'-phosphate	C10H13N4O7P	332.052	1.71	Nucleotide And Its Derivates	"3393-18-8"	537400
Com_38_neg	ADP-ribose	C15H23N5O14P2	591.315	1.05	Nucleotide And Its Derivates	"20762-30-5"	446400
Com_1279_pos	dUDP	C9H14N2O11P2	388.162	7.17	Nucleotide And Its Derivates	"4208-67-7"	428400
Com_474_neg	2-Deoxyribose 5'-phosphate	C5H11O7P	214.1	1.22	Nucleotide And Its Derivates		426400
Com_341_neg	CDP	C9H15N3O11P2	403.176	0.99	Nucleotide And Its Derivates	"63-38-7"	418500
Com_1527_pos	8-Hydroxy-2-Deoxyguanosine	C10H13N5O5	283.241	0.96	Nucleotide And Its Derivates	"88847-89-6"	399600
Com_31_neg	dATP	C10H16N5O12P3	491.001	0.73	Nucleotide And Its Derivates	"1927-31-7"	390700
Com_1178_pos	2'-Deoxycytidine	C9H13N3O4	227.217	1.18	Nucleotide And Its Derivates	"207121-53-7"	386600
Com_1371_pos	GDP-L-fucose	C16H25N5O15P2	589.342	4.13	Nucleotide And Its Derivates	"15839-70-0"	385700
Com_1079_pos	beta-Nicotinamide Mononucleotide	C11H15N2O8P	334.219	0.993	Nucleotide And Its Derivates	"1094-61-7"	356500
Com_906_pos	Xanthosine	C10H12N4O6	284.225	3.928	Nucleotide And Its Derivates	"146-80-5"	350900
Com_944_pos	5-Methyluridine	C10H14N2O6	258.228	1.02	Nucleotide And Its Derivates	"1463-10-1"	330000
Com_462_neg	Flavin Adenine Dinucleotide	C27H33N9O15P2	785.55	5.16	Nucleotide And Its Derivates	"146-14-5"	320700
Com_496_neg	2-Deoxyribose 1-Phosphate	C5H11O7P	214.11	1.01	Nucleotide And Its Derivates	"17210-42-3"	287600
Com_718_neg	dUMP	C9H13N2O8P	308.182	0.92	Nucleotide And Its Derivates	"964-26-1"	261000
Com_263_neg	ATP	C10H16N5O13P3	507.181	1.04	Nucleotide And Its Derivates	"56-65-5"	240000
Com_235_neg	Uridine 5'-Diphospho-N-Acetylgalactosamine	C17H27N3O17P2	607.354	1	Nucleotide And Its Derivates	"7277-98-7"	198900
Com_1401_pos	Nicotinic acid adenine dinucleotide	C21H28N7O14P2	663.2	1.04	Nucleotide and its derivates		175900
Com_1577_pos	Adenosine5-phosphosulfate	C10H13N5NaO10PS	449.266	1.05	Nucleotide And Its Derivates	"102029-95-8"	165500
Com_945_pos	Guanosine 3',5'-Cyclic Monophosphate	C10H12N5O7P	345.205	0.71	Nucleotide And Its Derivates	"7665-99-8"	161400
Com_1334_pos	alpha-Nicotinamide adenine dinucleotide	C21H27N7O14P2	663.425	1.04	Nucleotide And Its Derivates	"7298-93-3"	156400
Com_253_neg	Guanosine 5'-diphosphate	C10H15N5O11P2	443.201	1.08	Nucleotide And Its Derivates	"146-91-8"	129700
Com_23_neg	UDP-D-xylose	C14H22N2O16P2	536.044	0.9	Nucleotide And Its Derivates	"3616-06-6"	113000
Com_576_neg	Thymidine	C10H14N2O5	242.23	4.289	Nucleotide And Its Derivates	"50-89-5"	77930
Com_1026_pos	beta-Nicotinamide adenine dinucleotide phosphate	C21H29N7O17P3	744.41	1.03	Nucleotide And Its Derivates	"53-59-8"	70640
Com_237_neg	UDP-D-glucuronate	C15H22N2O18P2	580.285	0.94	Nucleotide And Its Derivates	"2616-64-0"	48430
Com_571_neg	GDP-alpha-D-glucose	C16H25N5O16P2	637.34	1.02	Nucleotide And Its Derivates	"5750-57-2"	36860
Com_1453_pos	thiamine phosphate	C12H18ClN4O4PS	380.787	0.84	Nucleotide And Its Derivates	"532-40-1"	34190
Com_1684_pos	1-Methyladenosine	C11H15N5O4	281.268	13.5	Nucleotide And Its Derivates	"15763-06-1"	34070
Com_1041_pos	5-Ethyl-2'-deoxyuridine	C11H16N2O5	256.255	8.72	Nucleotide And Its Derivates	"15176-29-1"	30990
Com_1452_pos	Nebularine	C10H12N4O4	252.227	9.81	Nucleotide And Its Derivates	"550-33-4"	28630
Com_176_neg	Inosine diphosphate	C10H14N4O11P2	522.149	0.98	Nucleotide And Its Derivates	"86-04-4"	12610
Com_791_neg	Triacanthine	C10H13N5	203.24	6.178	Nucleotide And Its Derivates	"2365-40-4"	9962
Com_843_pos	S-Adenosyl-methionine	C22H30N6O8S2	570.639	0.84	Nucleotide And Its Derivates	"17176-17-9"	8399
Com_224_neg	dADP	C10H15N5O9P2	411.202	0.75	Nucleotide And Its Derivates	"2793-06-8"	8161
Com_517_neg	Deoxycytidine	C9H13N3O4	227.091	1.81	Nucleotide And Its Derivates	"951-77-9"	4233
Com_851_pos	Delphinidin 3-O-Rutinoside	C27H31O16	611.5	6.35	Anthocyanins	"58285-26-0"	29120000
Com_172_neg	Kinetin 9-riboside	C15H17N5O5	347.326	1.03	Anthocyanins	"4338-47-0"	9883000
Com_1601_pos	Cyanidin O-rutinoside	C27H31O15	595.52	6.66	Anthocyanins		3802000
Com_912_pos	Peonidin O-hexoside		463.123	6.8	Anthocyanins		1947000
Com_57_neg	Cyanidin O-acetylhexoside		490.1	7.12	Anthocyanins		1124000
Com_528_neg	Luteolin O-hexosyl-O-hexosyl-O-hexoside		772.1	5.52	Anthocyanins		724400
Com_630_neg	Petunidin-3-O-glucoside chloride	C22H23O12.Cl	514.865	5.282	Anthocyanins	"6988-81-4"	183300
Com_695_neg	Cyanidin 3-O-glucoside	C21H21ClO11	484.84	5.21	Anthocyanins	"7084-24-4"	162800
Com_381_neg	Rhein	C15H8O6	284.225	10.11	Anthocyanins	"478-43-3"	137800
Com_1184_pos	Petunidin 3-O-rutinoside	C28H33O16	625.56	6.78	Anthocyanins		122100
Com_1316_pos	Petunidin 3-O-glucoside	C22H23O12	479	0.98	Anthocyanins	"71991-88-3"	112400
Com_400_neg	Myrtillin chloride	C21H21ClO12	500.84	8.519	Anthocyanins	"6906-38-3"	107200
Com_629_neg	Idaein chloride	C21H21ClO11	484.84	5.213	Anthocyanins	"27661-36-5"	105400
Com_58_neg	Cyanidin O-syringic acid		466.1	5.28	Anthocyanins		87540
Com_852_pos	Pelargonidin 3-O-malonylhexoside		519.1	7.23	Anthocyanins		58590
Com_59_neg	Pelargonidin O-acetylhexoside		474.1	7.39	Anthocyanins		57700
Com_1384_pos	Procyanidin A3	C30H24O12	576.504	6.79	Anthocyanins		5813
Com_86_neg	Procyanidin B2	C30H26O12	578.529	5.16	Anthocyanins	"29106-49-8"	5055
Com_119_neg	Pelargonidin chloride	C15H11ClO5	306.7	6.91	Anthocyanins	"134-04-3"	5001
Com_714_neg	Yuheinoside	C16H24O9	360.356	4.39	Iridoid derivatives	"72396-01-1"	26670
Com_803_neg	Isoquercitrin	C21H20O12	464.38	6.596	Flavones and Flavonols	"482-35-9"	400400000
Com_378_neg	Quercetin-3'-O-glucoside	C21H20O12	464.382	6.53	Flavones and Flavonols		345000000
Com_1119_pos	Quercetin 5-O-hexoside			6.52	Flavones and Flavonols		327000000
Com_103_neg	Myricitrin	C21H20O12	464.38	6.547	Flavones and Flavonols	"17912-87-7"	315500000
Com_1584_pos	Quercetin-O-glucoside	C21H20O12	464.376	6.54	Flavones and Flavonols		191400000
Com_624_neg	Rutin	C27H30O16	610.518	6.451	Flavones and Flavonols	"153-18-4"	176700000
Com_396_neg	Hyperoside	C21H20O12	464.38	6.554	Flavones and Flavonols	"482-36-0"	175300000
Com_370_neg	Quercitrin	C21H20O11	448.38	7.24	Flavones and Flavonols	"522-12-3"	141600000
Com_1127_pos	Quercetin 7-O-rutinoside		610.2	6.4	Flavones and Flavonols		54700000
Com_904_pos	Quercetin-3-O-neohesperidoside	C27H30O16	610.153	6.35	Flavones and Flavonols	"117611-67-3"	37020000
Com_732_neg	Kaempferol 7-O-rhamnoside	C21H20O10	432.106	7.36	Flavones and Flavonols	"20196-89-8"	16720000
Com_520_neg	Kaempferol 3-O-robinobioside	C27H30O15	594.159	6.55	Flavones and Flavonols	"17297-56-2"	9616000
Com_1085_pos	Isohyperoside	C21H20O12	464.095	5.91	Flavones and Flavonols	"35589-21-0"	3469000
Com_1615_pos	Pectolinarigenin	C17H14O6	314.295	10.78	Flavones and Flavonols	"520-12-7"	3112000
Com_1327_pos	Neodiosmin	C28H32O15	608.545	7.12	Flavones and Flavonols	"38665-01-9"	3072000
Com_260_neg	Kaempferol7-O-beta-D-glucopyranoside	C21H20O11	448.377	6.65	Flavones and Flavonols	"16290-07-6"	1467000
Com_1507_pos	Oroxylin A	C16H12O5	284.263	10.55	Flavones and Flavonols	"480-11-5"	1137000
Com_17_neg	Isoschaftoside	C26H28O14	564.499	6.03	Flavones and Flavonols	"52012-29-0"	973500
Com_582_neg	Tiliroside	C30H26O13	594.52	7.879	Flavones and Flavonols	"20316-62-5"	864800
Com_1120_pos	Quercetin-3,4'-O-di-beta-glucopyranoside	C27H30O17	626.52	5.39	Flavones and Flavonols		642300
Com_848_pos	Schaftoside	C26H28O14	564.492	6.074	Flavones and Flavonols	"51938-32-0"	575800
Com_673_neg	Diosmetin	C16H12O6	300.26	8.911	Flavones and Flavonols	"520-34-3"	444300
Com_125_neg	Apigenin	C15H10O5	270.24	8.7	Flavones and Flavonols	"520-36-5"	438600
Com_737_neg	Laricitrin	C16H12O8	332.262	2.6	Flavones and Flavonols	"53472-37-0"	407900
Com_221_neg	Quercetin O-acetylhexoside		506.1	6.9	Flavones and Flavonols		386200
Com_189_neg	Acacetin O-acetyl hexoside		488.1	5.69	Flavones and Flavonols		315600
Com_551_neg	Isoorientin	C21H20O11	448.38	6.174	Flavones and Flavonols	"4261-42-1"	233000
Com_1169_pos	Syringetin 7-O-hexoside			0.97	Flavones and Flavonols		189100
Com_688_neg	Kaempferitrin	C27H30O14	578.519	6.641	Flavones and Flavonols	"482-38-2"	172600
Com_1171_pos	Syringetin 5-O-hexoside			0.97	Flavones and Flavonols		155900
Com_628_neg	Vitexin	C21H20O10	432.38	6.559	Flavones and Flavonols	"3681-93-4"	125000
Com_160_neg	Kaempferol	C15H10O6	286.24	8.811	Flavones and Flavonols	"520-18-3"	98290
Com_419_neg	Isovitexin	C21H20O10	432.378	6.533	Flavones and Flavonols	"29702-25-8"	81090
Com_601_neg	Isorhamnetin	C16H12O7	316.262	8.969	Flavones and Flavonols	"480-19-3"	67120
Com_210_neg	Luteolin	C15H10O6	286.24	8.06	Flavones and Flavonols	"491-70-3"	64110
Com_1683_pos	Tangeretin	C20H20O7	372.37	11.41	Flavones and Flavonols	"481-53-8"	61750
Com_1681_pos	Nobiletin	C21H22O8	402.39	10.518	Flavones and Flavonols	"478-01-3"	55490
Com_1032_pos	Casticin	C19H18O8	374.341	10.374	Flavones and Flavonols	"479-91-4"	41210
Com_981_pos	Chrysin O-hexoside		416.2	6.19	Flavones and Flavonols		34350
Com_1104_pos	Myricetin 3-O-galactoside	C21H20O13	480.376	7.19	Flavones and Flavonols	"15648-86-9"	33800
Com_554_neg	Galangin	C15H10O5	270.24	10.427	Flavones and Flavonols	"548-83-4"	30320
Com_374_neg	Quercetin	C15H10O7	302.236	8.96	Flavones and Flavonols	"117-39-5"	22750
Com_805_neg	Eupatilin	C18H16O7	344.32	10.004	Flavones and Flavonols	"22368-21-4"	10260
Com_109_neg	Gossypetin	C15H10O8	318.24	7.34	Flavonoids and flavonols	"489-35-0"	8429
Com_1534_pos	Typhaneoside	C34H42O20	770.685	6.32	Flavones and Flavonols	"104472-68-6"	7053
Com_303_neg	Tricetin	C15H10O7	302.043	4.56	Flavones and Flavonols	"520-31-0"	4514
Com_696_neg	Chrysin	C15H10O4	254.24	1.284	Flavones and Flavonols	"480-40-0"	3643
Com_690_neg	Scutellarein	C15H10O6	286.236	7.635	Flavones and Flavonols	"529-53-3"	3059
Com_1682_pos	Sinensetin	C20H20O7	372.37	9.55	Flavones and Flavonols	"2306-27-6"	2423
Com_647_neg	Wogonin	C16H12O5	284.26	10.287	Flavones and Flavonols	"632-85-9"	2011
Com_1274_pos	Hesperetin 5-O-glucoside	C22H24O11	464.419	6.59	Flavanones	"69651-80-5"	366300000
Com_154_neg	Neohesperidin dihydrochalcone	C28H36O15	612.576	6.43	Flavanones	"20702-77-6"	2719000
Com_1144_pos	Naringerin	C15H12O5	272.253	8.64	Flavanones	"67604-48-2"	1109000
Com_682_neg	Poncirin	C28H34O14	594.561	8.049	Flavanones	"14941-08-3"	946500
Com_133_neg	Butin	C15H12O5	272.069	8.61	Flavanones	"492-14-8"	798000
Com_402_neg	Naringenin	C15H12O5	272.25	8.683	Flavanones	"480-41-1"	708900
Com_1414_pos	Prunin	C21H22O10	434.121	7.02	Flavanones	"529-55-5"	596900
Com_1143_pos	Naringenin O-malonylhexoside			7.46	Flavanones		560100
Com_561_neg	Pinocembrin	C15H12O4	256.25	10.372	Flavanones	"480-39-7"	510800
Com_1531_pos	Fustin	C15H12O6	288.252	5.89	Flavanones	"20725-03-5"	494700
Com_960_pos	Isosakuranetin	C16H14O5	286.279	10.315	Flavanones	"480-43-3"	287700
Com_401_neg	Liquiritin	C21H22O9	418.39	6.98	Flavanones	"551-15-5"	230600
Com_99_neg	Neohesperidin	C28H34O15	610.56	7.2	Flavanones	"13241-33-3"	225400
Com_213_neg	Hesperidin	C28H34O15	610.56	7.09	Flavanones	"520-26-3"	164600
Com_591_neg	Neoeriocitrin	C27H32O15	596.542	6.38	Flavanones	"13241-32-2"	105700
Com_70_neg	Taxifolin O-glucoside	C21H22O12	466.392	5.31	Flavanones		91330
Com_6_neg	Eriodictyol	C15H12O6	288.252	7.999	Flavanones	"552-58-9"	67800
Com_519_neg	Isohemiphloin	C21H22O10	434.121	6.39	Flavanones	"3682-02-8"	65240
Com_140_neg	Sakuranetin	C16H14O5	286.279	1.01	Flavanones	"2957-21-3"	57060
Com_214_neg	Hesperetin	C16H14O6	302.27	8.972	Flavanones	"520-33-2"	33870
Com_1523_pos	Hesperetin C-hexosyl-O-hexosyl-O-hexoside			0.97	Flavanones		19510
Com_392_neg	Purpurin	C14H8O5	256.21	10.545	Flavanones	"81-54-9"	19250
Com_104_neg	Naringin	C27H32O14	580.53	6.979	Flavanones	"10236-47-2"	18550
Com_115_neg	Narirutin	C27H32O14	580.535	6.837	Flavanones	"14259-46-2"	13590
Com_312_neg	Liquiritigenin	C15H12O4	256.25	8.9	Flavanones	"578-86-9"	6216
Com_1091_pos	Isomangiferin	C19H18O11	422.085	1.51	Xanthone	"24699-16-9"	990500
Com_1380_pos	Kynurenic acid	C10H7NO3	189.17	5.296	Quinolines and derivatives	"492-27-3"	9218000
Com_1109_pos	4,6-Dihydroxyquinoline O-hexoside			1.09	Quinolines and derivatives		2681000
Com_1112_pos	4-Hydroxy-6-methylquinoline-3-carboxylic acid	C11H9NO3	203.194	13.14	Quinolines and derivatives	"35973-18-3"	2677000
Com_534_neg	Kynurenic acid O-hexside	C16H17NO8	351.1	3.82	Quinolines and derivatives		2583000
Com_1390_pos	Xanthurenic acid	C10H7NO4	205.167	5.06	Quinolines and derivatives	"59-00-7"	1182000
Com_1510_pos	Nitidine	C21H18NO4	348.379	7.77	Quinolines and derivatives	"6872-57-7"	14580
Com_1273_pos	2,6-Dimethoxybenzoquinone	C8H8O4	168.042	4.69	Quinones	"530-55-2"	2095000
Com_1678_pos	Przewaquinone A	C19H18O4	310.344	11.752	Quinones	"76843-23-7"	848200
Com_1132_pos	Tanshinone II B	C19H18O4	310.347	10.795	Quinones	"17397-93-2"	253300
Com_1624_pos	Neocryptotanshinone	C19H22O4	314.376	12.151	Quinones	"109664-02-0"	159900
Com_192_neg	Bisulfurous Acid	C11H8O2	172.18	0.95	Quinones	"58-27-5"	58810
Com_794_neg	Emodin-8-glucoside	C21H20O10	432.384	8.09	Quinones	"23313-21-5"	56790
Com_692_neg	Aurantio-obtusin	C17H14O7	330.289	9.734	Quinones	"67979-25-3"	25780
Com_216_neg	Emodin	C15H10O5	270.24	11.453	Quinones	"518-82-1"	9385
Com_558_neg	Diacerein	C19H12O8	368.29	9.512	Quinones	"13739-02-1"	5563
Com_1653_pos	Denin	C33H56O14	676.79	11.46	Steroids and steroid derivatives		6666000
Com_1289_pos	Solanidine	C27H43NO	397.636	0.96	Steroids and steroid derivatives	"80-78-4"	2208000
Com_405_neg	Astragaloside Ⅱ	C43H70O15	827.01	8.99	Steroids and steroid derivatives	"84676-89-1"	108800
Com_272_neg	Astragaloside I	C45H72O16	869.04	10.92	Steroids and steroid derivatives	"84680-75-1"	41580
Com_677_neg	Tauroursodeoxycholic acid	C26H45NO6S	499.711	10.04	Steroids and steroid derivatives	"14605-22-2"	6040
Com_1113_pos	4-Ketolutein	C45H54O3	582.9	0.73	Carotenoids		233600
Com_887_pos	Tricetin O-hexoside			6.46	Flavonoids		327800000
Com_281_neg	Isotrifoliin	C21H20O12	464.096	6.59	Flavonoids	"21637-25-2"	321500000
Com_269_neg	Spiraeoside	C21H20O12	464.096	6.59	Flavonoids	"20229-56-5"	306500000
Com_134_neg	Quercetin 7-O-beta-D-Glucuronide		478.36	6.53	Flavonoids		199500000
Com_655_neg	Rutin hydrate	C27H30O16.xH2O	610.52	6.36	Flavonoids	"207671-50-9"	171000000
Com_779_neg	Isomucronulatol-7-O-glucoside	C23H28O10	464.469	6.53	Flavonoids	"94367-43-8"	168900000
Com_1282_pos	Luteolin-4'-O-glucoside	C21H20O11	448.101	6.8	Flavonoids	"6920-38-3"	72920000
Com_585_neg	Vincetoxicoside B	C21H20O11	448.383	6.97	Flavonoids	"22007-72-3"	69380000
Com_735_neg	Morin	C15H10O7	302.043	8.05	Flavonoids	"6472-38-4"	15120000
Com_317_neg	Kaempferin	C21H20O10	432.106	7.35	Flavonoids	"482-39-3"	14970000
Com_1501_pos	Linarin	C28H32O14	592.553	7.79	Flavonoids	"480-36-4"	12970000
Com_50_neg	Ophiopogonanone C	C19H16O7	356.332	5.38	Flavonoids	"477336-75-7"	10390000
Com_404_neg	Lonicerin	C27H30O15	594.526	6.73	Flavonoids	"20633-84-5"	9249000
Com_387_neg	Di-O-methylquercetin	C17H14O7	330.1	9.19	Flavonoids		7189000
Com_562_neg	Astilbin	C21H22O11	450.39	6.745	Flavonoids	"29838-67-3"	5782000
Com_835_pos	Chrysoeriol 7-O-rutinoside	C28H32O15	608.545	6.94	Flavonoids		5686000
Com_1361_pos	Avicularin	C20H18O11	434.085	6.78	Flavonoids	"572-30-5"	4671000
Com_1410_pos	Biochanin A 7-O-beta-D-glucoside	C22H22O10	446.404	7.76	Flavonoids		3034000
Com_1167_pos	Chalcone	C15H12O	208.255	6.47	Flavonoids	"94-41-7"	2297000
Com_452_neg	Afzelechin	C15H14O5	274.084	0.68	Flavonoids	"2545-00-8"	2209000
Com_1675_pos	Complanatuside	C28H32O16	624.544	7.13	Flavonoids	"116183-66-5"	2159000
Com_1643_pos	Luteolin O-malonylhexoside			7.02	Flavonoids		2066000
Com_632_neg	Luteolin 7-O-glucoside	C21H20O11	448.38	6.664	Flavonoids	"5373-11-5"	2005000
Com_702_neg	Diosmin	C28H32O15	608.54	7.57	Flavonoids	"520-27-4"	1842000
Com_1504_pos	Kaempferol-3-O-rutinoside	C27H30O15	594.526	6.51	Flavonoids	"17650-84-9"	1834000
Com_1463_pos	Resokaempferol 7-O-hexoside	C21H20O10	434.4	7.08	Flavonoids		1811000
Com_350_neg	Trifolin	C21H20O11	448.101	6.62	Flavonoids	"23627-87-4"	1432000
Com_1046_pos	Luteolin 8-C-hexosyl-O-hexoside		610.2	6.4	Flavonoids		1149000
Com_1640_pos	methylApigenin C-pentoside	C21H20O9	416.378	1.01	Flavonoids		996700
Com_836_pos	Chrysoeriol 5-O-hexoside	C22H22O11	462.404	7.18	Flavonoids		982800
Com_1465_pos	Chrysoeriol 7-O-hexoside	C22H22O11	448.4	7.2	Flavonoids		942700
Com_1407_pos	Apigenin O-malonylhexoside			7.46	Flavonoids		913800
Com_220_neg	Chrysoeriol O-homovanillic acid		464.1	6.56	Flavonoids		907700
Com_1437_pos	Homoplantaginin	C22H22O11	462.403	7.186	Flavonoids	"17680-84-1"	891600
Com_1168_pos	Chrysoeriol O-hexosyl-O-pentoside			7.1	Flavonoids		819600
Com_1367_pos	5-O-Methylvisammioside	C22H28O10	452.45	7.037	Flavonoids	"84272-85-5"	653700
Com_654_neg	Scutellarin	C21H18O12	462.36	6.59	Flavonoids	"27740-01-8"	606600
Com_1448_pos	8-C-hexosyl chrysoeriol O-hexoside			0.92	Flavonoids		445500
Com_121_neg	Amentoflavone	C30H18O10	538.46	9.16	Flavonoids	"1617-53-4"	425500
Com_384_neg	Syringic acid O-glucoside		360.1	4.82	Flavonoids		413400
Com_523_neg	Phlorizin	C21H24O10	436.41	7.24	Flavonoids	"60-81-1"	412500
Com_424_neg	Kaempferol 3-A-L-Arabinopyranoside	C20H18O10	418.351	7.08	Flavonoids	"99882-10-7"	410200
Com_983_pos	Apigenin C-glucoside	C21H20O10	432.113	6.46	Flavonoids	"38953-85-4"	395200
Com_1122_pos	Gallocatechin-gallocatechin		610.2	6.24	Flavonoids		379300
Com_1181_pos	C-hexosyl-chrysoeriol O-hexoside	C28H32O16	624.552	1	Flavonoids		366800
Com_1502_pos	Ligustroflavone	C33H40O18	724.669	9.84	Flavonoids	"260413-62-5"	338600
Com_1424_pos	Isorhamnetin rutinose or hexose-deoxyhexose			6.7	Flavonoids		321700
Com_1045_pos	Chrysoeriol 6-C-hexoside 8-C-hexoside-O-hexoside		786.1	0.95	Flavonoids		321100
Com_450_neg	Pinobanksin	C15H12O5	272.069	7.06	Flavonoids	"548-82-3"	295000
Com_866_pos	Kaempferol-3-gentiobioside	C27H30O16	610.525	6.28	Flavonoids	"22149-35-5"	282300
Com_1537_pos	Tricetin O-malonylhexoside			6.11	Flavonoids		273200
Com_894_pos	C-pentosyl-C-hexosyl-apigenin	C26H28O14	564.49	6.05	Flavonoids		261700
Com_1044_pos	C-hexosyl-luteolin O-hexosyl-O-pentoside		742.1	0.72	Flavonoids		256800
Com_963_pos	Apigenin C-pentoside	C20H18O9	402.35	0.73	Flavonoids		230200
Com_1639_pos	methylApigenin C-hexoside	C22H22O10	446.404	0.73	Flavonoids		228200
Com_91_neg	Isorhamnetin-3-O-neohespeidoside	C28H32O16	624.552	6.79	Flavonoids	"55033-90-4"	223200
Com_1521_pos	C-hexosyl-apigenin O-hexosyl-O-pentoside			0.65	Flavonoids		223100
Com_170_neg	Kuwanon A	C25H24O6	420.454	0.7	Flavonoids	"62949-77-3"	222800
Com_1524_pos	Chrysoeriol O-glucuronic acid			7.08	Flavonoids		216900
Com_1172_pos	Selgin O-hexosyl-O-hexoside			0.97	Flavonoids		214300
Com_1464_pos	C-hexosyl-apigenin O-hexosyl-O-hexosyl-O-hexoside			6.94	Flavonoids		207200
Com_1179_pos	Luteolin C-hexoside derivative	C21H20O11	448.4	6.1	Flavonoids		204500
Com_1398_pos	Limocitrin O-hexoside	C23H24O13	508.43	0.97	Flavonoids		196600
Com_1047_pos	Eriodictyol O-malonylhexoside	C24H24O14	536	7.12	Flavonoids		196300
Com_55_neg	Acetyl-eriodictyol O-hexoside		492.1	6.31	Flavonoids		175900
Com_762_neg	Dihydrokaempferol	C15H12O6	288.063	5.75	Flavonoids	"480-20-6"	164500
Com_35_neg	Luteolin-7-O-beta-D-glucuronide	C21H18O12	462.366	6.53	Flavonoids	"29741-10-4"	161600
Com_1103_pos	Apigenin-6,8-di-C-glycoside	C27H30O15	594.518	5.73	Flavonoids	"23666-13-9"	156900
Com_183_neg	Tricin O-saccharic acid		522.1	6.58	Flavonoids		132500
Com_1125_pos	C-hexosyl-apigenin C-pentoside		564.1	6.07	Flavonoids		130700
Com_1467_pos	Tricin 4'-O-(syringyl alcohol)ether derivative			1.08	Flavonoids		127300
Com_1538_pos	Tricin 7-O-hexoside	C23H24O12	492.436	7.63	Flavonoids		123500
Com_1043_pos	Syringetin 3-O-hexoside		508.1	0.98	Flavonoids		122900
Com_627_neg	Silymarin	C25H22O10	482.44	8.514	Flavonoids	"22888-70-6"	121500
Com_1525_pos	Chrysoeriol O-malonylhexoside			7.51	Flavonoids		112500
Com_631_neg	Isorhoifolin	C27H30O14	578.52	6.84	Flavonoids	"552-57-8"	112400
Com_1588_pos	methylChrysoeriol 5-O-hexoside	C23H24O11	476.43	0.97	Flavonoids		112300
Com_1586_pos	Selgin 5-O-hexoside	C22H22O12	478.4	0.94	Flavonoids		111800
Com_832_pos	C-hexosyl-tricetin O-pentoside			7.02	Flavonoids		111400
Com_1590_pos	methylNaringenin C-pentoside	C21H22O9	418.394	0.72	Flavonoids		107300
Com_962_pos	Narcissoside	C28H32O16	624.544	6.825	Flavonoids	"604-80-8"	106400
Com_570_neg	Heptamethoxyflavone	C22H24O9	432.42	7.08	Flavonoids		105200
Com_1522_pos	Eriodictiol 6-C-hexoside 8-C-hexoside-O-hexoside			0.97	Flavonoids		101100
Com_1637_pos	Selgin O-malonylhexoside			7.19	Flavonoids		100500
Com_1055_pos	O-methylnaringenin C-pentoside	C21H22O9	418.1	0.72	Flavonoids		89960
Com_626_neg	Taxifolin	C15H12O7	304.25	6.885	Flavonoids	"480-18-2"	86610
Com_625_neg	Rhoifolin	C27H30O14	578.52	6.94	Flavonoids	"17306-46-6"	84660
Com_1597_pos	Calycosin-7-O-beta-D-glucoside	C22H22O10	446.404	6.581	Flavonoids	"20633-67-4"	81990
Com_1423_pos	Irisolidone 7-O-beta-d-glucoside	C23H24O11	476.43	0.97	Flavonoids	"6009-88-7"	79440
Com_34_neg	Apigenin7-O-beta-D-glucuronide	C21H18O11	446.367	7.08	Flavonoids	"29741-09-1"	75680
Com_1054_pos	3',4',5'-Dihydrotricetin O-hexosyl-O-hexoside		670.1	6.01	Flavonoids		72910
Com_1520_pos	8-C-hexosyl-apigenin O-hexosyl-O-hexoside			0.9	Flavonoids		69930
Com_51_neg	Isorhamnetin O-acetyl-hexoside		520.1	7.23	Flavonoids		64070
Com_1636_pos	Selgin C-hexoside derivative			0.87	Flavonoids		60710
Com_429_neg	Sieboldin	C21H24O11	452.131	5.35	Flavonoids	"18777-73-6"	54190
Com_1585_pos	Selgin C-hexoside	C22H22O12	478.4	0.74	Flavonoids		52850
Com_1655_pos	di-C,C-hexosyl-apigenin	C27H30O15	594.518	5.82	Flavonoids		49220
Com_1460_pos	4'-O-Glucosylvitexin	C27H30O15	594.518	6.28	Flavonoids	"38950-94-6"	49150
Com_1466_pos	methylLuteolin C-hexoside	C22H22O11	448.4	0.71	Flavonoids		47000
Com_884_pos	Tricin 4'-O-(beta-guaiacylglyceryl) ether 5-O-hexoside	C33H36O16	688.63	7.51	Flavonoids		46380
Com_1354_pos	C-hexosyl-apigenin O-hexosyl-O-hexoside	C33H40O20	756.66	0.98	Flavonoids		42130
Com_126_neg	Apigenin 5-O-glucoside	C21H20O10	432.38	6.68	Flavonoids	"28757-27-9"	41180
Com_1652_pos	di-C,C-pentosyl-luteolin	C25H26O14	550.46	0.73	Flavonoids		32620
Com_56_neg	Apigenin O-hexosyl-O-pentoside	C26H28O14	564.1	6.83	Flavonoids		29480
Com_886_pos	Tricin 4'-O-(syringyl alcohol) ether O-hexoside	C32H34O15	658.6	7.34	Flavonoids		27990
Com_1587_pos	methylQuercetin O-hexoside			0.98	Flavonoids		23520
Com_258_neg	Myricetin 3-O-rutinoside	C27H30O17	626.148	6.08	Flavonoids		23280
Com_1314_pos	Hecogenin	C27H42O4	430.628	6.08	Flavonoids	"467-55-0"	19930
Com_185_neg	Wogonoside	C22H20O11	460.388	8.26	Flavonoids	"51059-44-0"	19240
Com_768_neg	7-O-Methyleriodictyol	C16H14O6	302.079	8.86	Flavonoids	"51857-11-5"	17360
Com_1158_pos	5,7-Dihydroxy-3',4',5'-trimethoxyflavone	C18H16O7	344.09	4.99	Flavonoids	"18103-42-9"	16760
Com_1651_pos	di-C,C-pentosyl-apigenin	C25H26O13	534.47	6.59	Flavonoids		13640
Com_1124_pos	C-hexosyl-chrysoeriol O-rutinoside		770.1	0.7	Flavonoids		12920
Com_372_neg	Methylophiopogonanone A	C19H18O6	342.343	0.78	Flavonoids	"74805-92-8"	12110
Com_39_neg	Liguiritigenin-7-O-D-apiosyl-4'-O-D-glucoside	C26H30O13	550.516	6.49	Flavonoids	"199796-12-8"	7278
Com_54_neg	Chrysoeriol C-pentosyl-O-hexosyl-O-hexoside		756.1	5.97	Flavonoids		6987
Com_588_neg	(-)-Gallocatechin	C15H14O7	306.267	4.51	Flavonoids	"3371-27-5"	6964
Com_120_neg	Apigenin 4-O-rhamnoside	C21H20O9	416	7.971	Flavonoids	"133538-77-9"	6341
Com_618_neg	Chrysosplenetin B	C19H18O8	374.347	10.34	Flavonoids	"603-56-5"	6098
Com_53_neg	Chrysoeriol 8-C-pentosyl-O-rutinoside		740.2	6.18	Flavonoids		4729
Com_903_pos	4',5,6,7-Tetramethoxyflavone	C19H18O6	342.11	9.87	Flavonoids	"1168-42-9"	3259
Com_1101_pos	Tricin 4'-O-(beta-guaiacylglyceryl) ether-O-rutinoside			7.33	Flavonoids		2954
Com_738_neg	Homoeriodictyol	C16H14O6	302.279	4.44	Flavonoids	"446-71-9"	2516
Com_885_pos	Tricin 4'-O-(syringyl alcohol) ether 5-O-hexoside	C32H34O15	658.6	10.82	Flavonoids		2450
Com_114_neg	Hydroxygenkwanin	C16H12O6	300.263	9.594	Flavonoids	"20243-59-8"	2396
Com_309_neg	5'-Adenylic acid	C10H14N5O7P	347.221	1.036	Pentose phosphates	"61-19-8"	11560000
Com_717_neg	D-Arabinose 5-phosphate	C5H11O8P	230.11	0.9	Pentose phosphates	"13137-52-5"	1382000
Com_605_neg	D-Xylulose 5-phosphate	C5H11O8P	230.11	0.9	Pentose phosphates	"4212-65-1"	1335000
Com_348_neg	D-Ribose 5-phosphate	C5H11O8P	230.11	0.89	Pentose phosphates	"3615-55-2"	1263000
Com_719_neg	Deoxyribose 5-Phosphate	C5H11O7P	235.084	0.82	Pentose phosphates	"102916-66-5"	128800
Com_37_neg	5-Phosphoribosyl 1-pyrophosphate	C5H13O14P3	196.25	1.01	Pentose phosphates	"97-55-2"	3556
Com_1394_pos	LPC(1-acyl 18:2)	C26H50NO7P	519.65	12.18	Phospholipid		378000000
Com_1356_pos	LysoPC 16:0 (2n isomer)	C24H50NO7P	495.33	12.55	Phospholipid		239200000
Com_1397_pos	LPC(1-acyl 16:0)	C24H50NO7P	495.63	12.59	Phospholipid		171000000
Com_1129_pos	LysoPC 18:2	C26H50NO7P	519.3	12.14	Phospholipid		145800000
Com_146_neg	Lysope 16:0	C21H44NO7P	453.55	12.48	Phospholipid	"53862-35-4"	82460000
Com_92_neg	LysoPE 16:0 (2n isomer)	C21H44NO7P	453.3	12.5	Phospholipid		81870000
Com_1128_pos	LysoPC 18:3	C26H48NO7P	517.3	12.56	Phospholipid		61470000
Com_1641_pos	LPC(1-acyl 18:3)	C26H48NO7P	517.63	12.59	Phospholipid		56130000
Com_1193_pos	LysoPC 18:2 (2n isomer)	C26H50NO7P	519	11.95	Phospholipid		44530000
Com_1190_pos	LysoPC 18:3 (2n isomer)	C26H48NO7P	517.2	11.33	Phospholipid		43650000
Com_1358_pos	LysoPC 18:0	C26H54NO7P	523.36	13.8	Phospholipid		13250000
Com_1191_pos	LysoPC 18:1 (2n isomer)	C26H52NO7P	521.4	12.7	Phospholipid		12290000
Com_1393_pos	LPC(1-acyl 18:1)	C26H52NO7P	521.67	12.76	Phospholipid		10770000
Com_1194_pos	LysoPE 18:2 (2n isomer)	C23H44NO7P	477.6	12.08	Phospholipid		7143000
Com_1301_pos	LysoPC 15:0	C23H48NO7P	481.3	11.94	Phospholipid		3909000
Com_1192_pos	LysoPC 18:1	C26H52NO7P	521.1	12.86	Phospholipid		3380000
Com_148_neg	Lysope 18:1	C23H46NO7P	479.588	12.81	Phospholipid		2497000
Com_611_neg	Lysopa 16:0	C19H39O7P	410.48	12.54	Phospholipid		1703000
Com_1656_pos	LysoPC 20:2 (2n isomer)	C28H54NO7P	547.36	13.26	Phospholipid		1272000
Com_1456_pos	LysoPC 20:2	C28H54NO7P	547.7	13.26	Phospholipid		1269000
Com_147_neg	Lysope 18:0	C23H48NO7P	479.588	13.73	Phospholipid		1265000
Com_984_pos	LysoPC 16:2	C24H46NO7P	491.308	11.06	Phospholipid		1161000
Com_1357_pos	LysoPC 14:0 (2n isomer)	C22H46NO7P	467.3	11.36	Phospholipid		1142000
Com_1578_pos	Lysopc 17:0	C25H52NO7P	509.657	13.17	Phospholipid	"50930-23-9"	1130000
Com_1299_pos	LysoPC 20:4	C28H50NO7P	543.4	12.69	Phospholipid		1078000
Com_1579_pos	Lysopc 14:0	C22H46NO7P	467.577	11.37	Phospholipid	"20559-16-4"	1040000
Com_854_pos	LysoPC 20:0 (2n isomer)	C28H58NO7P	551.39	9.09	Phospholipid		1029000
Com_1189_pos	LysoPC 16:2 (2n isomer)	C24H46NO7P	491.3	10.88	Phospholipid		376100
Com_1395_pos	LPC(1-acyl 16:1)	C24H48NO7P	493.61	11.54	Phospholipid		373100
Com_1396_pos	LPC(1-acyl 16:2)	C24H46NO7P	491.6	10.99	Phospholipid		346400
Com_995_pos	LysoPC 16:1	C24H48NO7P	493.3	11.57	Phospholipid		341700
Com_145_neg	Lysope 14:0	C19H40NO7P	425.5	11.27	Phospholipid		251700
Com_150_neg	Lysops 22:5	C28H46NO9P	571.64	13.68	Phospholipid		249700
Com_1305_pos	LysoPC 10:0	C18H38NO7P	411.3	6.25	Phospholipid		192000
Com_811_pos	Lysopc 20:0	C28H58NO7P	551.73	15.1	Phospholipid		190600
Com_610_neg	Lysopa 18:0	C21H43O7P	438.53	13.78	Phospholipid		111700
Com_149_neg	Lysopg 18:1	C24H47O9P	510.6	13.81	Phospholipid		87400
Com_1300_pos	LysoPC 15:1	C23H46NO7P	479.1	11.45	Phospholipid		47040
Com_1451_pos	Azoxystrobin acid			10.49	Ethers		53470
Com_964_pos	Ambroxane	C16H28O	236.393	14.01	Ethers	"6790-58-5"	18620
Com_955_pos	Tetraethylammonium fluoride	C8H20FN	149.25	1.04	Pyrimidines and pyrimidine derivatives	"665-46-3"	47060000
Com_820_pos	2,2'-Cyclouridine	C9H10N2O5	226.186	1.01	Pyrimidines and pyrimidine derivatives	"3736-77-4"	2675000
Com_621_neg	5-Hydroxymethyluracil	C5H6N2O3	142.113	0.96	Pyrimidines and pyrimidine derivatives	"4433-40-3"	94330
Com_1659_pos	(+)-epipinoresinol-4-O-beta-D-glucoside	C26H32O11	520.53	7.12	Lignans	"74983-66-7"	5059000
Com_1575_pos	(+)-pinoresinol 4'-O-beta-D-glucopyranoside	C26H32O11	520.533	7.38	Lignans	"24404-49-7"	3936000
Com_1565_pos	Matairesinol	C20H22O6	358.391	8.87	Lignans	"580-72-3"	1610000
Com_73_neg	Matairesinoside	C26H32O11	520.533	7.38	Lignans	"23202-85-9"	1551000
Com_1574_pos	(-)-Pinoresinol	C20H22O6	358.391	8.88	Lignans	"81446-29-9"	1244000
Com_1070_pos	Fragransin A2	C20H24O5	344.408	10.56	Lignans	"112652-46-7"	345300
Com_27_neg	Lirioresinol A	C22H26O8	418.162	6.96	Lignans	"21453-71-4"	313000
Com_684_neg	Lariciresinol-4'-O-glucoside	C26H34O11	522.211	6.56	Lignans	"143663-00-7"	235700
Com_1319_pos	Eleutheroside E	C34H46O18	742.718	6.19	Lignans	"39432-56-9"	64330
Com_771_neg	Pinoresinol-glucoside	C26H32O11	520.526	7.23	Lignans	"69251-96-3"	58600
Com_856_pos	(-)-Arctigenin	C21H24O6	372.41	9.652	Lignans	"7770-78-7"	52990
Com_787_neg	1-Hydroxypinoresinol-1-O-Glucoside	C26H32O12	536.189	6.62	Lignans	"81495-71-8"	51940
Com_1481_pos	Enterodiol	C18H22O4	302.152	16.98	Lignans	"80226-00-2"	14440
Com_524_neg	Secoisolariciresinol diglucoside	C32H46O16	686.7	6.224	Lignans	"148244-82-0"	6880
Com_1383_pos	delta-Hexanolactone	C6H10O2	114.142	1	Lactones	"823-22-3"	24600000
Com_1479_pos	Lactucin	C15H16O5	276.1	0.67	Lactones	"1891-29-8"	3607000
Com_1236_pos	Dihydroactindiolide	C11H16O2	180.243	5.51	Lactones	"17092-92-1"	2163000
Com_750_neg	D-Erythronolactone	C4H6O4	118.027	4.05	Lactones	"15667-21-7"	187600
Com_1556_pos	gamma-Dodecalactone	C12H22O2	198.302	4.5	Lactones	"57084-18-1"	100700
Com_1042_pos	epsilon-Caprolactone	C6H10O2	114.142	1.048	Lactones	"502-44-3"	77180
Com_1476_pos	2-Hydroxy-6-Aminopurine	C5H5N5O	151.126	2.76	Purines and purine derivatives	"3373-53-3"	314500000
Com_924_pos	7-methylguanine	C6H7N5O	165.065	4.11	Purines and purine derivatives	"578-76-7"	165700000
Com_1062_pos	Aminopurine	C5H5N5	135.1	1.24	Purines and purine derivatives		161400000
Com_1131_pos	Adenine	C5H5N5	135.127	1.032	Purines and purine derivatives	"73-24-5"	130700000
Com_256_neg	Guanine	C5H5N5O	151.126	2.77	Purines and purine derivatives	"73-40-5"	7911000
Com_1208_pos	Hypoxanthine	C5H4N4O	136.11	1.509	Purines and purine derivatives	"68-94-0"	1708000
Com_1607_pos	1-Methyladenine	C6H7N5	149.153	1.05	Purines and purine derivatives	"5142-22-3"	979600
Com_842_pos	Purine	C5H4N4	120.112	4.1	Purines and purine derivatives	"120-73-0"	775300
Com_595_neg	1-Methylguanine	C6H7N5O	165.153	4.09	Purines and purine derivatives	"938-85-2"	35310
Com_62_neg	Aminophylline	C16H24N10O4	420.43	5.013	Purines and purine derivatives	"317-34-0"	28310
Com_403_neg	1,7-Dimethylxanthine	C7H8N4O2	180.164	9.96	Purines and purine derivatives	"611-59-6"	25820
Com_1477_pos	Quinone	C6H4O2	108.021	0.93	Carbonyl compounds	"106-51-4"	7931000
Com_1224_pos	Methional	C4H8OS	104.171	0.84	Carbonyl compounds	"3268-49-3"	4236000
Com_656_neg	2-Acetylpyrazine	C6H6N2O	122.12	7.4	Carbonyl compounds	"22047-25-2"	1584000
Com_1051_pos	3-Hydroxykynurenine	C10H12N2O4	224.1	5.96	Carbonyl compounds	"2147-61-7"	604500
Com_1379_pos	L-Kynurenine	C10H12N2O3	208.21	3.821	Carbonyl compounds	"2922-83-0"	493600
Com_1413_pos	N-Formylkynurenine	C11H12N2O4	236.08	4.17	Carbonyl compounds	"1022-31-7"	372800
Com_336_neg	p-Hydroxybenzaldehyde	C7H6O2	122.12	6.214	Carbonyl compounds	"123-08-0"	120300
Com_668_neg	Ketoisophorone	C9H12O2	152.19	8.28	Carbonyl compounds	"1125-21-9"	71520
Com_1604_pos	5-Hydroxymethylfurfural	C6H6O3	126.11	4.285	Carbonyl compounds	"67-47-0"	60650
Com_1560_pos	Muscone	C16H30O	238.41	15.95	Carbonyl compounds	"541-91-3"	47790
Com_1594_pos	Pogostone	C12H16O4	224.253	12.279	Carbonyl compounds	"23800-56-8"	34730
Com_646_neg	Ethylvanillin	C9H10O3	166.17	8.701	Carbonyl compounds	"121-32-4"	17010
Com_1375_pos	Gomisin N	C23H28O6	400.472	14.07	Tannins	"69176-52-9"	3855000
Com_545_neg	1-O-Galloyl-D-glucose	C13H16O10	332.074	4.68	Tannins	"58511-73-2"	967400
Com_1321_pos	Angeloyl-(+)-gomisin K3	C28H36O7	484.59	12.01	Tannins	"1023744-69-5"	140200
Com_1373_pos	Gomisin O	C23H28O7	416.471	11.32	Tannins	"72960-22-6"	122900
Com_1374_pos	Gomisin E	C28H34O9	514.572	13.09	Tannins	"72960-21-5"	92810
Com_1283_pos	2-Methylcinnamic acid	C10H10O2	162.185	5.53	Cinnamic acids and derivatives	"2373-76-4"	31040000
Com_1176_pos	Hydroxycinnamate	C9H8O3	164.158	5.54	Cinnamic acids and derivatives	"614-60-8"	20430000
Com_226_neg	Caffeic acid	C9H8O4	180.16	5.801	Cinnamic acids and derivatives	"331-39-5"	20070000
Com_1365_pos	Verbascoside	C29H36O15	624.59	6.581	Cinnamic acids and derivatives	"61276-17-3"	12620000
Com_49_neg	p-Coumaric acid 4-O-hexoside			5.54	Cinnamic acids and derivatives		11650000
Com_512_neg	Caffeic acid O-glucoside	C15H18O9	342	5.38	Cinnamic acids and derivatives		4098000
Com_393_neg	p-Coumaric Acid	C9H8O3	164.16	6.549	Cinnamic acids and derivatives	"501-98-4"	3120000
Com_1543_pos	p-Coumaroylagmatine	C14H20N4O2	276.334	12.15	Cinnamic acids and derivatives	"7295-86-5"	3105000
Com_1666_pos	Sinapinic Acid	C11H12O5	224.21	6.865	Cinnamic acids and derivatives	"530-59-6"	2715000
Com_1355_pos	5-O-Caffeoylshikimic acid	C16H16O8	336.293	11.63	Cinnamic acids and derivatives	"180981-12-8"	2697000
Com_543_neg	2-Hydroxycinnamate	C9H8O3	164.047	6.48	Cinnamic acids and derivatives	"583-17-5"	2558000
Com_225_neg	p-Hydroxy-cinnamic acid	C9H8O3	164.16	6.531	Cinnamic acids and derivatives	"7400-08-0"	2554000
Com_1021_pos	N1,N10-Dicoumaroyl spermidine	C25H31N3O4	437.53	6.24	Cinnamic acids and derivatives		2511000
Com_1095_pos	Cinnamic Acid	C9H8O2	148.16	0.87	Cinnamic acids and derivatives	"621-82-9"	2455000
Com_194_neg	3-Hydroxycinnamic acid	C9H8O3	164.16	6.98	Cinnamic acids and derivatives	"14755-02-3"	2265000
Com_1100_pos	O-Feruloyl coumarin			5.6	Cinnamic acids and derivatives		2143000
Com_708_neg	5-O-p-Coumaroylquinic acid	C16H18O8	338	5.4	Cinnamic acids and derivatives		1967000
Com_792_neg	Ethyl caffeate	C11H12O4	208.211	8.507	Cinnamic acids and derivatives	"102-37-4"	1174000
Com_975_pos	Coumarin O-rutinoside		454.1	8.68	Cinnamic acids and derivatives		775700
Com_277_neg	Sodium ferulate	C10H9NaO4	216.17	6.81	Cinnamic acids and derivatives	"24276-84-4"	481200
Com_977_pos	N'-p-Coumaroyl agmatine		276.2	13.08	Cinnamic acids and derivatives		469800
Com_507_neg	3-Phenylpropanoic acid	C9H10O2	150.174	0.7	Cinnamic acids and derivatives	"501-52-0"	467600
Com_365_neg	Ethyl 4-Methoxycinnamate	C12H14O3	206.238	9.518	Cinnamic acids and derivatives	"24393-56-4"	305600
Com_1428_pos	Isoferulic Acid	C10H10O4	194.18	7.008	Cinnamic acids and derivatives	"537-73-5"	259900
Com_316_neg	Rosmarinic acid	C18H16O8	360.31	7.211	Cinnamic acids and derivatives	"20283-92-5"	212800
Com_179_neg	O-p-coumaroyl-O-salicyloyl quinic acid	C23H22O10	458.1	5.55	Cinnamic acids and derivatives		207300
Com_1072_pos	N-p-Cinnamoylagmatine			12.67	Cinnamic acids and derivatives		189700
Com_196_neg	p-Coumaric acid ethyl ester	C11H12O3	192.21	9.387	Cinnamic acids and derivatives	"7362-39-2"	149700
Com_754_neg	4-Hydroxy-3-methoxycinnamic acid	C10H10O4	194.058	5.34	Cinnamic acids and derivatives	"537-98-4"	144500
Com_802_neg	O-p-Coumaroyl quinacyl quinic acid O-hexoside	C29H38O18	674.1	5.89	Cinnamic acids and derivatives		121500
Com_982_pos	N', N''-di-p-coumaroylspermine		494.297	5.31	Cinnamic acids and derivatives		120700
Com_1102_pos	N-Caffeoyl agmatine			12.3	Cinnamic acids and derivatives		118000
Com_670_neg	4-Methoxycinnamic acid	C10H10O3	178	8.56	Cinnamic acids and derivatives	"830-09-1"	109300
Com_1061_pos	O-Feruloyl 4-hydroxylcoumarin	C19H14O6	338.1	17.01	Cinnamic acids and derivatives		108500
Com_660_neg	Caffeic Acid Phenethyl Ester	C17H16O4	284.31	10.49	Cinnamic acids and derivatives	"104594-70-9"	99660
Com_978_pos	N-p-Coumaroyl agmatine	C14H20N4O2	276.1	13.08	Cinnamic acids and derivatives		60650
Com_1084_pos	p-Coumaric acid methyl ester	C10H10O3	178.063	7.45	Cinnamic acids and derivatives	"3943-97-3"	54490
Com_929_pos	p-Aminocinnamic acid	C9H9NO2	163.176	4.05	Cinnamic acids and derivatives	"2393-18-2"	51860
Com_44_neg	Sibirioside A	C21H28O12	472.446	6.46	Cinnamic acids and derivatives	"173046-19-0"	46830
Com_1295_pos	N-p-Coumaroylputrescine	C13H18N2O2	234.29	4.91	Cinnamic acids and derivatives		35210
Com_909_pos	Feruloylcholine		280	12.63	Cinnamic acids and derivatives		30870
Com_1126_pos	5-O-p-Coumaroyl shikimic acid	C16H16O7	320.1	1	Cinnamic acids and derivatives		26080
Com_1059_pos	N-Feruloyl spermidine		320.1	17.03	Cinnamic acids and derivatives		25330
Com_973_pos	p-Coumaroylputrescine	C13H18N2O2	234.1	4.62	Cinnamic acids and derivatives	"34136-53-3"	18670
Com_1296_pos	N-Feruloylputrescine	C14H20N2O3	264.32	5.22	Cinnamic acids and derivatives		14600
Com_1060_pos	N-Caffeoyl putrescine	C13H18N2O3	250.1	4.56	Cinnamic acids and derivatives	"29554-26-5"	13590
Com_1242_pos	Feruloylputrescine	C14H20N2O3	264.1	5.04	Cinnamic acids and derivatives	"501-13-3"	12260
Com_366_neg	3,4-Dimethoxycinnamic acid	C11H12O4	208.211	7.909	Cinnamic acids and derivatives	"2316-26-9"	11320
Com_974_pos	N-hexosyl-p-coumaroyl putrescine		396.1	17.63	Cinnamic acids and derivatives		8152
Com_76_neg	Ethyl ferulate	C12H14O4	222.24	9.8	Cinnamic acids and derivatives	"4046-02-0"	7213
Com_322_neg	trans-Cinnamic acid	C9H8O2	148.16	8.507	Cinnamic acids and derivatives	"140-10-3"	3375
Com_752_neg	L(-)-Malic acid	C4H6O5	134.022	1.08	Tca Cycle	"636-61-3"	393200000
Com_338_neg	Citric acid	C6H8O7	192.12	1.516	Tca Cycle	"77-92-9"	188200000
Com_240_neg	Succinic acid	C4H6O4	118.09	1.936	Tca Cycle	"110-15-6"	78960000
Com_340_neg	cis-Aconitic acid	C6H6O6	174.11	1.766	Tca Cycle	"585-84-2"	30200000
Com_617_neg	Fumaric Acid	C4H4O4	116.072	1.11	Tca Cycle	"110-17-8"	2306000
Com_622_neg	alpha-Ketoglutaric acid	C5H6O5	146.098	0.87	Tca Cycle	"328-50-7"	798300
Com_141_neg	Pyruvic Acid	C3H4O3	88.062	4.88	Tca Cycle	"127-17-3"	35550
Com_943_pos	Betaine	C5H11NO2	117.15	0.907	Alkaloids and derivatives	"107-43-7"	32400000
Com_896_pos	Betanin	C24H26N2O13	550.143	6.65	Alkaloids and derivatives	"7659-95-2"	8122000
Com_1619_pos	vasicine	C11H12N2O	188.229	4.86	Alkaloids and derivatives	"6159-55-3"	4560000
Com_1155_pos	6-Deoxyfagomine	C6H13NO2	131.095	2.06	Alkaloids and derivatives	"197449-09-5"	3649000
Com_1382_pos	beta-Nicotyrine	C10H10N2	158.2	4.91	Alkaloids and derivatives	"487-19-4"	3100000
Com_178_neg	Quercetin 3-O-sophoroside	C27H30O17	626.524	6.13	Alkaloids and derivatives	"18609-17-1"	2818000
Com_926_pos	Hirsuteine	C22H26N2O3	366.46	4.86	Alkaloids and derivatives	"35467-43-7"	2235000
Com_289_neg	Ligustrazine	C8H12N2	136.197	0.88	Alkaloids and derivatives	"1124-11-4"	1664000
Com_1068_pos	Trigonelline	C7H7NO2	137.136	1	Alkaloids and derivatives	"535-83-1"	1449000
Com_770_neg	Lumichrome	C12H10N4O2	242.233	5.93	Alkaloids and derivatives	"1086-80-2"	494300
Com_1162_pos	Calystegine A3	C7H13NO3	159.09	0.73	Alkaloids and derivatives	"131580-36-4"	440400
Com_1513_pos	Mesaconitine	C33H45NO11	631.72	8.28	Alkaloids and derivatives	"2752-64-9"	376600
Com_1308_pos	Gramine	C11H14N2	174.24	9.938	Alkaloids and derivatives	"87-52-5"	203300
Com_1306_pos	Cocamidopropyl betaine	C19H38N2O3	342.1	9.91	Alkaloids and derivatives	"86438-79-1"	188900
Com_1009_pos	Santacruzamate A	C15H22N2O3	278.35	8.68	Alkaloids and derivatives	"1477949-42-0"	187300
Com_1573_pos	N'-Nitrosoanabasine	C10H13N3O	191.23	5.006	Alkaloids and derivatives	"1133-64-8"	177000
Com_1202_pos	Protostemonine	C25H31NO6	417.495	0.65	Alkaloids and derivatives	"27495-40-5"	136000
Com_1433_pos	(+)-Tetrandrine	C38H42N2O6	622.762	6.53	Alkaloids and derivatives	"518-34-3"	102000
Com_1558_pos	Protopine	C20H19NO5	353.37	6.91	Alkaloids and derivatives	"130-86-9"	83620
Com_1014_pos	Tropinone	C8H13NO	139.19	1	Alkaloids and derivatives	"532-24-1"	77210
Com_1342_pos	Quinidine	C20H24N2O2	324.411	5.831	Alkaloids and derivatives	"56-54-2"	76500
Com_1514_pos	Benzoylmesaconine	C31H43NO10	589.683	7.33	Alkaloids and derivatives	"63238-67-5"	62950
Com_1677_pos	Hydroprotopine	C20H20NO5+	354.377	6.87	Alkaloids and derivatives	"128397-41-1"	56580
Com_847_pos	Imperialine	C27H43NO3	429.635	6.799	Alkaloids and derivatives	"61825-98-7"	47010
Com_816_pos	Swainsonine	C8H15NO3	173.21	5.53	Alkaloids and derivatives	"72741-87-8"	43250
Com_819_pos	Tetrahydroberberine	C20H21NO4	339.39	7.39	Alkaloids and derivatives	"522-97-4"	39680
Com_1340_pos	Arecoline	C8H13NO2	155.197	1.24	Alkaloids and derivatives	"63-75-2"	35680
Com_1462_pos	Berberine	C20H18NO4+	336.361	7.87	Alkaloids and derivatives	"2086-83-1"	34740
Com_1672_pos	lupinine	C10H19NO	169.267	1.54	Alkaloids and derivatives	"486-70-4"	31950
Com_1674_pos	Talatisamine	C24H39NO5	421.57	6.18	Alkaloids and derivatives	"20501-56-8"	27800
Com_1616_pos	Oxymatrine	C15H24N2O2	264.368	6.76	Alkaloids and derivatives	"54809-74-4"	20640
Com_1611_pos	Reserpine	C33H40N2O9	608.689	8.12	Alkaloids and derivatives	"50-55-5"	19990
Com_1661_pos	Codeine	C18H21NO3	299.37	14.06	Alkaloids and derivatives	"76-57-3"	19300
Com_1372_pos	Hydroxytomatidine	C27H45NO3	431.65	0.99	Alkaloids and derivatives		17230
Com_1669_pos	Bullatine A	C22H33NO2	343.51	5.83	Alkaloids and derivatives	"1354-84-3"	13800
Com_777_neg	Chelidonic acid	C7H4O6	184.1	1.46	Alkaloids and derivatives	"99-32-1"	13480
Com_1648_pos	Phellodendrine	C20H24NO4+	342.409	5.636	Alkaloids and derivatives	"6873-13-8"	11300
Com_1323_pos	Sinoacutine	C19H21NO4	327.374	6.04	Alkaloids and derivatives	"4090-18-0"	8493
Com_1248_pos	Capsaicin	C18H27NO3	305.41	11.071	Alkaloids and derivatives	"404-86-4"	2577
Com_1486_pos	D-Arabitol	C5H12O5	152.15	0.926	Sugar Alcohols	"488-82-4"	48550000
Com_1225_pos	Maltotriitol	C18H34O16	506.453	1.07	Sugar Alcohols	"32860-62-1"	1597000
Com_1480_pos	DL-threitol	C4H10O4	122.058	0.67	Sugar alcohols	"6968-16-7"	474100
Com_334_neg	L-Arabinitol	C5H12O5	152.15	0.925	Sugar Alcohols	"7643-75-6"	101900
Com_241_neg	Ribitol	C5H12O5	152.15	0.927	Sugar Alcohols	"488-81-3"	52130
Com_1658_pos	(-)-Norepinephrine N-hexoside	C14H21NO8	331.32	1.05	Glycosides		4551000
Com_1114_pos	Picramnioside F	C33H34O15	670.614	0.97	Glycosides		265900
Com_676_neg	Salidroside	C14H20O7	300.304	5.089	Glycosides	"10338-51-9"	40350
Com_358_neg	D-Gluconic acid	C6H12O7	196.155	0.91	Carbohydrates And Its Derivatives	"526-95-4"	72910000
Com_914_pos	Melezitose	C18H32O16	504.44	0.998	Carbohydrates And Its Derivatives	"597-12-6"	38670000
Com_1218_pos	Turanose	C12H21O11Na	364.078	0.95	Carbohydrates And Its Derivatives	"547-25-1"	21530000
Com_731_neg	Galactinol	C12H22O11	342.116	0.99	Carbohydrates And Its Derivatives		19520000
Com_446_neg	Coniferin	C16H22O8	342.132	0.97	Carbohydrates And Its Derivatives	"531-29-3"	18620000
Com_1136_pos	Nicotinic acid-hexoside			0.97	Carbohydrates And Its Derivatives		18570000
Com_311_neg	alpha,alpha-Trehalose	C12H22O11	342.296	0.962	Carbohydrates And Its Derivatives	"99-20-7"	17840000
Com_391_neg	Raffinose	C18H32O16	504.437	1.009	Carbohydrates And Its Derivatives	"512-69-6"	17360000
Com_667_neg	Isomaltulose	C12H22O11	342.116	0.97	Carbohydrates And Its Derivatives	"13718-94-0"	14520000
Com_182_neg	Melibiose	C12H22O11	342.3	0.96	Carbohydrates And Its Derivatives	"585-99-9"	13290000
Com_245_neg	D-Galactaric acid	C6H10O8	210.038	0.87	Carbohydrates And Its Derivatives	"526-99-8"	11310000
Com_1528_pos	2-Deoxy-D-galactose	C6H12O5	164.156	0.69	Carbohydrates And Its Derivatives	"1949-89-9"	8883000
Com_736_neg	Sucrose	C12H22O11	342.116	0.98	Carbohydrates And Its Derivatives	"57-50-1"	8269000
Com_489_neg	D-Glucose 6-phosphate	C6H13O9P	260.03	0.86	Carbohydrates And Its Derivatives	"56-73-5"	8103000
Com_500_neg	D-Tagatose	C6H12O6	180.156	0.96	Carbohydrates And Its Derivatives	"87-81-0"	6468000
Com_283_neg	alpha-D-Galactose 1-phosphate	C6H13O9P	260.136	0.87	Carbohydrates And Its Derivatives	"2255-14-3"	5644000
Com_265_neg	D-Fructose 6-Phosphate	C6H13O9P	260.136	0.86	Carbohydrates And Its Derivatives	"643-13-0"	5361000
Com_380_neg	Cellotriose	C18H32O16	504.437	1.02	Carbohydrates And Its Derivatives	"33404-34-1"	4495000
Com_357_neg	D-Glucarate	C6H10O8	210.139	0.82	Carbohydrates And Its Derivatives	"87-73-0"	4469000
Com_231_neg	D-Glucuronic acid	C6H10O7	194.14	0.894	Carbohydrates And Its Derivatives	"6556-12-3"	3368000
Com_330_neg	D-Mannose 6-phosphate	C6H13O9P	260.136	0.87	Carbohydrates And Its Derivatives	"723729-16-6"	3066000
Com_1545_pos	Nicotinate ribonucleoside	C11H13NO6	255.224	1.04	Carbohydrates And Its Derivatives	"17720-18-2"	2919000
Com_476_neg	D-Galacturonic acid	C6H10O7	194.139	1.56	Carbohydrates And Its Derivatives	"685-73-4"	2544000
Com_589_neg	beta-D-Lactose	C12H22O11	342.297	1	Carbohydrates And Its Derivatives	"5965-66-2"	2489000
Com_333_neg	alpha-D-Glucose	C6H12O6	180.16	0.912	Carbohydrates And Its Derivatives	"492-62-6"	1887000
Com_741_neg	D-Glucose 1-phosphate	C6H13O9P	260.136	0.86	Carbohydrates And Its Derivatives		1804000
Com_355_neg	D-Glucopyranose	C6H12O6	180.156	0.87	Carbohydrates And Its Derivatives	"28905-12-6"	1749000
Com_445_neg	D-Galactose	C6H12O6	180.16	0.9	Carbohydrates And Its Derivatives	"59-23-4"	1734000
Com_1348_pos	Tuberonic acid hexoside	C18H28O9	388.41	5.89	Carbohydrates And Its Derivatives		1721000
Com_1066_pos	Glucosamine sulfate	C6H15NO9S	277.25	0.79	Carbohydrates And Its Derivatives	"29031-19-4"	1705000
Com_1246_pos	pteroside A	C21H30O8	410.464	5.73	Carbohydrates And Its Derivatives	"35910-15-7"	1565000
Com_29_neg	D-Arabinono-1,4-lactone	C5H8O5	148.037	1.48	Carbohydrates And Its Derivatives	"2782-09-4"	1478000
Com_337_neg	Lactobionic acid	C12H22O12	358.3	0.91	Carbohydrates And Its Derivatives	"96-82-2"	1323000
Com_238_neg	Ribose 1-phosphate	C5H11O8P	230.11	0.9	Carbohydrates And Its Derivatives	"14075-00-4"	1295000
Com_399_neg	D-Glucose	C6H12O6	180.156	0.94	Carbohydrates And Its Derivatives	"50-99-7"	1133000
Com_729_neg	Fructose	C6H12O6	180.16	0.92	Carbohydrates And Its Derivatives	"57-48-7"	1009000
Com_275_neg	L-Sorbose	C6H12O6	180.16	0.89	Carbohydrates And Its Derivatives	"87-79-6"	945000
Com_18_neg	Trehalose 6-phosphate	C12H23O14P	422.276	0.96	Carbohydrates And Its Derivatives	"4484-88-2"	894500
Com_710_neg	D-Erythrose 4-phosphate	C4H9O7P	200.084	1.08	Carbohydrates And Its Derivatives	"585-18-2"	829300
Com_448_neg	D-Ribose	C5H10O5	150.13	0.92	Carbohydrates And Its Derivatives	"50-69-1"	811000
Com_1341_pos	Glucosamine	C6H13NO5	179.173	0.793	Carbohydrates And Its Derivatives	"3416-24-8"	797100
Com_332_neg	Lactose	C12H22O11	342.3	0.911	Carbohydrates And Its Derivatives	"63-42-3"	751800
Com_1311_pos	picrocrocin	C16H26O7	330.37	6.36	Carbohydrates And Its Derivatives	"138-55-6"	733100
Com_1199_pos	Xylitol	C5H12O5	152.15	1.14	Carbohydrates And Its Derivatives	"87-99-0"	569500
Com_765_neg	Maltose	C12H22O11	342.3	1.01	Carbohydrates And Its Derivatives	"69-79-4"	569400
Com_36_neg	N-Acetylglucosamine 1-phosphate	C8H16NO9P	301.1	0.91	Carbohydrates And Its Derivatives	"6866-69-9"	557100
Com_881_pos	Isomaltose	C12H22O11	342.297	0.9	Carbohydrates And Its Derivatives	"499-40-1"	544300
Com_568_neg	D-Xylulose	C5H10O5	150.13	1.01	Carbohydrates And Its Derivatives	"551-84-8"	522700
Com_1_neg	D-(+)-Cellobiose	C12H22O11	342.3	0.91	Carbohydrates And Its Derivatives	"528-50-7"	518300
Com_223_neg	Sorbitol 6-phosphate	C6H15O9P	262.045	0.86	Carbohydrates And Its Derivatives	"20479-58-7"	496100
Com_248_neg	Ribose 5-phosphate	C5H11O8P	230.02	0.84	Carbohydrates And Its Derivatives	"4300-28-1"	465700
Com_464_neg	Stachyose	C24H42O21	666.578	0.93	Carbohydrates And Its Derivatives	"470-55-3"	457500
Com_487_neg	Dl-Glyceraldehyde 3-phosphate	C3H7O6P	169.998	2.76	Carbohydrates And Its Derivatives	"591-59-3"	427700
Com_734_neg	Ribulose-5-phosphate	C5H11O8P	230.02	0.93	Carbohydrates And Its Derivatives		424800
Com_1159_pos	N-Acetyl-D-galactosamine	C8H15NO6	221.09	1	Carbohydrates And Its Derivatives	"1811-31-0"	411900
Com_439_neg	Nystose	C24H42O21	666.578	1.03	Carbohydrates And Its Derivatives	"13133-07-8"	339600
Com_415_neg	beta-L-Arabinose	C5H10O5	150.13	0.9	Carbohydrates And Its Derivatives	"5328-37-0"	318700
Com_459_neg	D-Xylose	C5H10O5	150.131	1.01	Carbohydrates And Its Derivatives	"58-86-6"	306800
Com_715_neg	6-Phosphogluconic acid	C6H13O10P	276.135	0.91	Carbohydrates And Its Derivatives	"921-62-0"	282700
Com_412_neg	Maltotriose	C18H32O16	504.44	0.94	Carbohydrates And Its Derivatives	"1109-28-0"	263700
Com_117_neg	Maltotetraose	C24H42O21	666.578	0.996	Carbohydrates And Its Derivatives	"34612-38-9"	259200
Com_806_neg	Dulcitol	C6H14O6	182.17	0.897	Carbohydrates And Its Derivatives	"608-66-2"	235500
Com_239_neg	s7p	C7H13BaO10P	425.473	0.87	Carbohydrates And Its Derivatives	"2646-35-7"	229700
Com_644_neg	Gluconolactone	C6H10O6	178.14	1.02	Carbohydrates And Its Derivatives	"90-80-2"	207300
Com_379_neg	Lobetyolin	C20H28O8	396.431	6.9	Carbohydrates And Its Derivatives	"136085-37-5"	198600
Com_15_neg	1,6-Anhydro-beta-D-Glucopyranose	C6H10O5	162.141	2.3	Carbohydrates And Its Derivatives	"498-07-7"	197400
Com_171_neg	Kinsenoside	C10H16O8	264.229	3.93	Carbohydrates And Its Derivatives	"151870-74-5"	189400
Com_20_neg	6-Sialyllactose	C23H39NO19	633.551	0.73	Carbohydrates And Its Derivatives	"35890-39-2"	180700
Com_361_neg	Dihydroxyacetone phosphate	C3H7O6P	170.058	0.9	Carbohydrates And Its Derivatives	"57-04-5"	178600
Com_1427_pos	5-Aminolevulinic acid	C5H9NO3	131.13	0.872	Carbohydrates And Its Derivatives	"106-60-5"	165900
Com_100_neg	Salicin	C13H18O7	286.28	4.989	Carbohydrates And Its Derivatives	"138-52-3"	158000
Com_98_neg	Mannitol	C6H14O6	182.173	0.88	Carbohydrates And Its Derivatives	"69-65-8"	141500
Com_572_neg	L-Fucose	C6H12O5	164.069	0.95	Carbohydrates And Its Derivatives	"2438-80-4"	116500
Com_658_neg	L-Rhamnose	C6H12O5	164.16	0.98	Carbohydrates And Its Derivatives	"73-34-7"	96570
Com_246_neg	alpha-Arbutin	C12H16O7	272.25	2.33	Carbohydrates And Its Derivatives	"84380-01-8"	91560
Com_368_neg	D-Fructose-1,6-biphosphate	C6H14O12P2	339.996	0.91	Carbohydrates And Its Derivatives	"38099-82-0"	82780
Com_298_neg	Arbutin	C12H16O7	272.25	2.32	Carbohydrates And Its Derivatives	"497-76-7"	69050
Com_1116_pos	2-Phenylethyl glucosinolate	C15H21NO9S2	423.459	5.41	Carbohydrates And Its Derivatives	"499-30-9"	64940
Com_1333_pos	Gentiobiose	C12H22O11	342.297	1	Carbohydrates And Its Derivatives	"554-91-6"	61800
Com_485_neg	D-sedoheptulose-1-7-phosphate			8.7	Carbohydrates And Its Derivatives		60270
Com_493_neg	L-(+)-Rhamnose Monohydrate	C6H14O6	182.17	0.96	Carbohydrates And Its Derivatives	"10030-85-0"	56210
Com_64_neg	Sucralose	C12H19Cl3O8	397.634	1.1	Carbohydrates And Its Derivatives	"56038-13-2"	41740
Com_105_neg	Maltopentaose	C30H52O26	828.726	0.99	Carbohydrates And Its Derivatives	"34620-76-3"	40580
Com_483_neg	Glucarate O-Phosphoric Acid			8.7	Carbohydrates And Its Derivatives		36960
Com_447_neg	D(+)-Melezitose O-rhamnoside	C24H42O20	650.1	1.05	Carbohydrates And Its Derivatives		36890
Com_300_neg	Glyceraldehyde 3-phosphate	C3H7O6P	170.058	1.03	Carbohydrates And Its Derivatives	"142-10-9"	11980
Com_346_neg	N-Acetyl-D-glucosamine 6-phosphate	C8H16NO9P	301.188	1.81	Carbohydrates And Its Derivatives		9653
Com_1099_pos	DIMBOA glucoside	C15H19NO10	374.108	4.26	Carbohydrates And Its Derivatives	"18607-79-9"	7999
Com_1555_pos	Fructose 1,6-diphosphate	C6H14O12P2	340.116	6.9	Carbohydrates And Its Derivatives	"34693-15-7"	6823
Com_329_neg	D-3-Phosphoglyceric acid	C3H5H2O7P	230.021	0.95	Sugar Acids And Its Derivatives	"80731-10-8"	1470000
Com_11_neg	L-Gulono-1,4-lactone	C6H10O6	178.14	0.948	Sugar Acids And Its Derivatives	"1128-23-0"	533600
Com_711_neg	D-Fructose 1,6-bisphosphate	C6H14O12P2	340.116	0.88	Sugar Acids And Its Derivatives	"488-69-7"	88580
Com_889_pos	Muramic acid	C9H17NO7	251.234	13.38	Sugar Acids And Its Derivatives	"1114-41-6"	43570
Com_180_neg	Quinic acid O-di-glucuronic acid	C19H28O18	544.1	1.41	Sugar Acids And Its Derivatives		43010
Com_1147_pos	N-Acetylneuraminic acid	C11H19NO9	309.273	0.988	Sugar Acids And Its Derivatives	"131-48-6"	5145
Com_857_pos	Betulonic acid	C30H46O3	454.68	11.061	Terpenoids	"4481-62-3"	8526000
Com_468_neg	Capsianoside I	C32H52O14	660.336	0.98	Terpenoids	"121924-04-7"	8034000
Com_1455_pos	Lappaconitine	C32H44N2O8	584.7	7.37	Terpenoids	"32854-75-4"	7404000
Com_781_neg	Isomangiferolic acid	C30H48O3	456.36	14.72	Terpenoids	"13878-92-7"	7072000
Com_319_neg	Betulinic acid	C30H48O3	456.7	14.842	Terpenoids	"472-15-1"	6607000
Com_800_neg	alpha-Hederin	C41H66O12	750.96	10.735	Terpenoids	"27013-91-8"	3793000
Com_13_neg	Chikusetsusponin Iva	C42H66O14	794.977	9.34	Terpenoids	"51415-02-2"	3258000
Com_1288_pos	alpha-Ionone	C13H20O	192.297	1.86	Terpenoids	"127-41-3"	3238000
Com_1111_pos	beta-Ionone	C13H20O	192.297	8.5	Terpenoids	"14901-07-6"	3224000
Com_423_neg	Oleuropein	C25H32O13	540.51	7.421	Terpenoids	"32619-42-4"	3051000
Com_1595_pos	Fraxinellone	C14H16O3	232.275	11.429	Terpenoids	"28808-62-0"	1646000
Com_1255_pos	Atractylenolide II	C15H20O2	232.318	12.22	Terpenoids	"73069-14-4"	1553000
Com_60_neg	Raddeanin A	C47H76O16	897.097	8.22	Terpenoids	"89412-79-3"	1552000
Com_1603_pos	Obacunone	C26H30O7	454.51	10.997	Terpenoids	"751-03-1"	1414000
Com_494_neg	Asiatic Acid	C30H48O5	488.7	10.75	Terpenoids	"464-92-6"	1190000
Com_541_neg	Eucommiol	C9H16O4	188.105	7.31	Terpenoids	"55930-44-4"	1171000
Com_549_neg	Saikosaponin D	C42H68O13	780.98	11.181	Terpenoids	"20874-52-6"	1154000
Com_831_pos	Phytocassane C	C20H30O3	318.1	5.19	Terpenoids		1132000
Com_1408_pos	B Eupalinolide	C24H30O9	462.49	1.11	Terpenoids	"877822-40-7"	880500
Com_915_pos	Abietic Acid	C20H30O2	302.45	14.89	Terpenoids	"514-10-3"	781200
Com_664_neg	Artemisic acid	C15H22O2	234.334	13.19	Terpenoids	"80286-58-4"	655500
Com_416_neg	Ginsenoside-Ro	C48H76O19	957.119	8.86	Terpenoids	"34367-04-9"	616500
Com_435_neg	Maslinic acid	C30H48O4	472.7	13.077	Terpenoids	"4373-41-5"	599100
Com_304_neg	Ecliptasaponin A	C36H58O9	634.851	10.1	Terpenoids		597700
Com_107_neg	Loganic acid	C16H24O10	376.36	4.79	Terpenoids	"22255-40-9"	500900
Com_1284_pos	trans-beta-Ionone	C13H20O	192.297	9.97	Terpenoids	"79-77-6"	369600
Com_301_neg	Crocetin	C20H24O4	328.408	8.79	Terpenoids	"27876-94-4"	350800
Com_1411_pos	(-)-Borneol	C10H18O	154.249	1.06	Terpenoids	"464-45-9"	316000
Com_1285_pos	Geranylacetone	C13H22O	194.313	5.34	Terpenoids	"3796-70-1"	300500
Com_895_pos	trans-Citral	C10H16O	152.233	6.2	Terpenoids	"5392-40-5"	252800
Com_75_neg	Echinocystic acid	C30H48O4	472.7	13	Terpenoids	"510-30-5"	223700
Com_799_neg	Saikosaponin C	C48H78O17	927.136	9.18	Terpenoids	"20736-08-7"	220900
Com_1432_pos	Furanodiene	C15H20O	216.323	11.23	Terpenoids	"19912-61-9"	196700
Com_941_pos	Zerumbone	C15H22O	218.33	13.05	Terpenoids	"471-05-6"	187200
Com_127_neg	Ginsenoside F3	C41H70O13	770.999	8.8	Terpenoids	"62025-50-7"	165400
Com_1161_pos	Citroside A	C19H30O8	386.194	6.04	Terpenoids	"120330-44-1"	139900
Com_84_neg	Corosolic acid	C30H48O4	472.7	13.22	Terpenoids	"4547-24-4"	130200
Com_707_neg	Notoginsenoside R2	C41H70O13	770.999	8.78	Terpenoids	"80418-25-3"	123000
Com_499_neg	Ginsenoside F2	C42H72O13	831.051	11.14	Terpenoids	"62025-49-4"	122900
Com_1286_pos	Geranylgeraniol	C20H34O	290.483	5.47	Terpenoids	"24034-73-9"	90690
Com_136_neg	Ptaquiloside	C20H30O8	398.45	11.23	Terpenoids	"87625-62-5"	87690
Com_1250_pos	Paederosidic acid	C18H24O12S	464.445	10	Terpenoids	"18842-98-3"	87380
Com_546_neg	Saikosaponin A	C42H68O13	780.98	10.026	Terpenoids	"20736-09-8"	72990
Com_1475_pos	(-)-trans-Carveol	C10H16O	152.233	0.73	Terpenoids	"2102-58-1"	68910
Com_1517_pos	(+)-Pulegone	C10H16O	152.233	4.71	Terpenoids	"89-82-7"	68630
Com_490_neg	Enoxolone	C30H46O4	470.68	13.62	Terpenoids	"471-53-4"	61950
Com_925_pos	Dehydrocostus lactone	C15H18O2	230.307	12.25	Terpenoids	"477-43-0"	60210
Com_550_neg	Akebia saponin D	C47H76O18	929.1	8.402	Terpenoids	"39524-08-8"	53580
Com_190_neg	Madecassic acid	C6H12O5	164.156	0.99	Terpenoids	"18449-41-7"	52180
Com_704_neg	5,6-Dehydroginsenoside Rd	C48H80O18	945.152	8.61	Terpenoids	"1268459-68-2"	51000
Com_1307_pos	Limonin	C26H30O8	470.51	9.981	Terpenoids	"1180-71-8"	50950
Com_928_pos	Cantharidin	C10H12O4	196.203	5.98	Terpenoids	"56-25-7"	50010
Com_421_neg	(20R)Ginsenoside Rg3	C42H72O13	785.013	11.221	Terpenoids	"38243-03-7"	42600
Com_72_neg	Ajugol	C15H24O9	348.346	0.93	Terpenoids	"52949-83-4"	42430
Com_1554_pos	Ganodermanontriol	C30H48O4	472.7	5.7	Terpenoids	"106518-63-2"	37200
Com_1205_pos	pterosin A	C15H20O3	248.317	0.65	Terpenoids	"35910-16-8"	37090
Com_674_neg	Geniposidic acid	C16H22O10	374.34	4.615	Terpenoids	"27741-01-1"	36290
Com_1359_pos	Cucurbitacin I	C30H42O7	514.293	0.67	Terpenoids	"2222-07-3"	33770
Com_455_neg	8-Epiloganic acid	C16H24O10	376.36	4.83	Terpenoids	"82509-41-9"	33420
Com_321_neg	Carvacrol	C10H14O	150.22	1.467	Terpenoids	"499-75-2"	27760
Com_746_neg	Steviolbioside	C32H50O13	642.732	9.17	Terpenoids	"41093-60-1"	27160
Com_1495_pos	Curcumol	C15H24O2	236.35	12.847	Terpenoids	"4871-97-0"	24700
Com_431_neg	Sweroside	C16H22O9	358.341	6.017	Terpenoids	"14215-86-2"	23320
Com_156_neg	Poricoic acid B	C30H44O5	484.676	12.42	Terpenoids	"137551-39-4"	18220
Com_375_neg	Melittoside	C21H32O15	524.47	0.7	Terpenoids	"19467-03-9"	16630
Com_801_neg	Swertiamarin	C16H22O10	374.34	5.578	Terpenoids	"17388-39-5"	16470
Com_1625_pos	Sugiol	C20H28O2	300.435	12.838	Terpenoids	"511-05-7"	15050
Com_291_neg	Hastatoside	C17H24O11	404.366	5.74	Terpenoids	"50816-24-5"	10370
Com_653_neg	Ginsenoside Re	C48H82O18	947.15	7.43	Terpenoids	"52286-59-6"	10290
Com_565_neg	Ginsenoside C-K	C36H62O8	622.873	1.02	Terpenoids	"39262-14-1"	10110
Com_751_neg	Catalpol	C15H22O10	362.333	4.55	Terpenoids	"2415-24-9"	8659
Com_440_neg	Hederacoside D	C53H86O22	1075.24	8.14	Terpenoids	"760961-03-3"	8529
Com_1245_pos	Artemisinin	C15H22O5	282.33	18.285	Terpenoids	"63968-64-9"	5542
Com_398_neg	Notoginsenoside R1	C47H80O18	933.141	7.26	Terpenoids	"80418-24-2"	5279
Com_106_neg	Ursolic Acid	C30H48O3	456.7	15.069	Terpenoids	"77-52-1"	4064
Com_215_neg	Bilobalide	C15H18O8	326.3	7.268	Terpenoids	"33570-04-6"	3744
Com_609_neg	7beta-Hydroxylathyrol	C20H30O5	350.45	9.6	Terpenoids	"34208-98-5"	3599
Com_1622_pos	Euphorbia factor L3	C31H38O7	522.629	14.39	Terpenoids	"218916-52-0"	2996
Com_386_neg	Oleanic acid	C30H48O3	456.71	15.03	Terpenoids	"508-02-1"	2954
Com_296_neg	Ginkgolide A	C20H24O9	408.4	8.19	Terpenoids	"15291-75-5"	1895
Com_1098_pos	Diosgenin	C27H42O3	414.621	11.39	Terpene	"512-04-9"	22500000
Com_1606_pos	18-Nor-4,15-dihydroxyabieta-8,11,13-trien-7-one	C19H26O3	302.408	7.25	Terpene	"213329-46-5"	579200
Com_796_neg	Kaji-ichigoside F1	C36H58O10	650.85	6.71	Terpene	"95298-47-8"	167700
Com_95_neg	8-O-acetyl shanzhiside methyl ester	C19H28O12	448.418	6.48	Terpene	"57420-46-9"	10990
Com_1318_pos	Paeonol	C9H10O3	166.177	4.08	Ketones	"552-41-0"	2650000
Com_1270_pos	Gallacetophenone	C8H8O4	168.042	4.69	Ketones	"528-21-2"	1527000
Com_1405_pos	Apo-13-zeaxanthinone	C18H26O2	274.4	8.84	Ketones		1489000
Com_946_pos	Kynurenine	C10H12N2O3	208.214	3.78	Ketones	"343-65-7"	673600
Com_527_neg	4'-Hydroxyacetophenone	C8H8O2	136.15	6.6	Ketones	"99-93-4"	46920
Com_862_pos	PolygalaxanthoneⅥ	C23H26O12	494.452	7.14	Ketones		41150
Com_325_neg	2',5'-Dihydroxyacetophenone	C8H8O3	152.147	7.16	Ketones	"490-78-8"	11580
Com_773_neg	4'-Hydroxypropiophenone	C9H10O2	150.175	7.9	Ketones	"70-70-2"	9399
Com_1207_pos	Nicotinamide	C6H6N2O	122.12	1.539	Vitamins	"98-92-0"	147100000
Com_1485_pos	Isonicotinic acid	C6H5NO2	123.11	1.029	Vitamins	"55-22-1"	26900000
Com_844_pos	Vitamin B2	C17H20N4O6	376.364	5.94	Vitamins	"83-88-5"	21130000
Com_1050_pos	Pyridoxine O-glucoside	C14H21NO8	331.323	1.68	Vitamins		15010000
Com_1210_pos	Nicotinic Acid	C6H5NO2	123.11	1.478	Vitamins	"59-67-6"	9003000
Com_1117_pos	Pyridoxine	C8H11NO3	169.178	1.53	Vitamins	"65-23-6"	968000
Com_1339_pos	Orotic acid	C5H4N2O4	156.096	1.44	Vitamins	"65-86-1"	824000
Com_578_neg	Vitamin C	C6H8O6	176.12	1.03	Vitamins	"50-81-7"	698000
Com_535_neg	Vitamin B1	C12H17ClN4OS	300.808	0.82	Vitamins	"59-43-8"	253700
Com_1378_pos	Thiamine	C12H17N4OS+	265.354	0.81	Vitamins	"70-16-6"	233800
Com_649_neg	Pyridoxine 5'-phosphate	C8H12NO6P	249.04	0.89	Vitamins	"447-05-2"	108200
Com_1040_pos	4-Pyridoxic acid O-hexoside			1.66	Vitamins		102600
Com_461_neg	Menadione	C11H10O5S	254.262	1.1	Vitamins	"130-37-0"	44260
Com_1446_pos	Pyridoxine di-O-hexoside			0.97	Vitamins		30200
Com_700_neg	Pantetheine	C11H22N2O4S	278.13	5.84	Vitamins	"496-65-1"	21050
Com_587_neg	gamma,gamma-Dimethylallyl pyrophosphate	C5H12O7P2	246.092	0.95	Prenol lipids	"358-72-5"	97470000
Com_299_neg	Esculin	C15H16O9	340.28	5.145	Coumarins and derivatives	"531-75-9"	37560000
Com_1326_pos	Ethyl Coumarin-3-carboxylate	C12H10O4	218.205	9.29	Coumarins and derivatives	"1846-76-0"	3739000
Com_1053_pos	6-Hydroxymethylherniarin	C11H10O4	206.1	5.96	Coumarins and derivatives	"117597-79-2"	2966000
Com_286_neg	Warfarin Sodium	C19H15O4	330.31	5.56	Coumarins and derivatives	"129-06-6"	1514000
Com_1559_pos	Scopoletin	C10H8O4	192.17	6.933	Coumarins and derivatives	"92-61-5"	1262000
Com_1620_pos	Skimmin	C15H16O8	324.283	5.34	Coumarins and derivatives	"93-39-0"	613100
Com_1425_pos	Umbelliferone	C9H6O3	162.14	6.855	Coumarins and derivatives	"93-35-6"	582000
Com_251_neg	Ayapin	C11H8O3	188.041	7.3	Coumarins and derivatives	"494-56-4"	418700
Com_641_neg	Esculetin	C9H6O4	178.14	5.832	Coumarins and derivatives	"305-01-1"	338700
Com_913_pos	Coumaroyl choline		250	5.29	Coumarins and derivatives		251300
Com_764_neg	4-Methylesculetin	C10H8O4	192.17	6.45	Coumarins and derivatives	"529-84-0"	131100
Com_318_neg	Daphnetin	C9H6O4	178.14	6.126	Coumarins and derivatives	"486-35-1"	123900
Com_1186_pos	Phellodenol H O-hexoside			5.96	Coumarins and derivatives		92520
Com_457_neg	8-hydroxy-6,7-dimethoxycoumarin	C11H10O5	222.197	6.22	Coumarins and derivatives		89110
Com_1668_pos	Coumarin	C9H6O2	146.14	8.133	Coumarins and derivatives	"91-64-5"	50050
Com_469_neg	Smyrindioloside	C20H24O10	424.404	5.06	Coumarins and derivatives	"87592-77-6"	38820
Com_153_neg	Angelol B	C20H24O7	376.4	0.98	Coumarins and derivatives	"83156-04-1"	19890
Com_968_pos	Bergapten	C12H8O4	216.19	9.72	Coumarins and derivatives	"484-20-8"	7194
Com_1315_pos	Pratensein-7-O-glucoside	C22H22O11	462.41	6.86	Isoflavonoids	"36191-03-4"	1600000
Com_83_neg	Calycosin	C16H12O5	284.263	8.18	Isoflavonoids	"20575-57-9"	173800
Com_1605_pos	Sophoricoside	C21H20O10	432.38	7.038	Isoflavonoids	"152-95-4"	152500
Com_1007_pos	Deguelin	C23H22O6	394.42	12.143	Isoflavonoids	"522-17-8"	86370
Com_1056_pos	4',6,7-Trihydroxyisoflavone	C15H10O5	270.241	6.97	Isoflavonoids	"17817-31-1"	55070
Com_552_neg	Genistin	C21H20O10	432.38	6.78	Isoflavonoids	"529-59-9"	51770
Com_553_neg	Formononetin	C16H12O4	268.27	9.556	Isoflavonoids	"485-72-3"	41720
Com_162_neg	Maackiain	C16H12O5	284.263	9.87	Isoflavonoids	"19908-48-6"	32060
Com_709_neg	6''-o-acetylgenistin	C23H22O11	474.421	8.37	Isoflavonoids	"73566-30-0"	26400
Com_129_neg	Tectoridin	C22H22O11	462.4	6.864	Isoflavonoids	"611-40-5"	25120
Com_1313_pos	Glabrene	C20H18O4	322.361	10.49	Isoflavonoids	"60008-03-9"	16760
Com_297_neg	Genistein	C15H10O5	270.24	8.72	Isoflavonoids	"446-72-0"	11150
Com_583_neg	Medicarpin	C16H14O4	270.285	7.26	Isoflavonoids	"32383-76-9"	10950
Com_869_pos	Protobioside	C45H74O18	903.071	7.89	Isoflavonoids	"128052-96-0"	10790
Com_694_neg	Daidzein	C15H10O4	254.238	7.91	Isoflavonoids	"486-66-8"	1778
Com_1402_pos	Isoquinoline	C9H7N	129.1	4.87	Isoquinolines and derivatives	"119-65-3"	170900
Com_999_pos	Dl-Indole-3-lactic acid	C11H11NO3	205.21	4.87	Indoles and derivatives	"832-97-3"	194000000
Com_1278_pos	Indole-3-Carboxaldehyde	C9H7NO	145.158	7.33	Indoles and derivatives	"487-89-8"	28360000
Com_1226_pos	Lycoperodine	C12H12N2O2	216.236	5.47	Indoles and derivatives	"42438-90-4"	22520000
Com_516_neg	Indole-5-carboxylic acid	C9H7NO2	161.048	0.69	Indoles and derivatives	"1670-81-1"	13520000
Com_1692_pos	Indole	C8H7N	117.148	4.87	Indoles and derivatives	"120-72-9"	11960000
Com_1691_pos	5-Methoxyindoleacetic acid	C11H11NO3	205.21	4.87	Indoles and derivatives	"3471-31-6"	4749000
Com_966_pos	8-Chlro-1-tetrahydronorharmanone	C11H9ClN2O	220.655	2.67	Indoles and derivatives	"5565-76-4"	4150000
Com_917_pos	Indole-3-carboxylic acid	C9H7NO2	161.16	7.142	Indoles and derivatives	"771-50-6"	572000
Com_1064_pos	5-Methoxy-N,N-dimethyltryptamine	C13H18N2O	218.1	6.58	Indoles and derivatives	"1019-45-0"	376400
Com_1277_pos	Indole-3-acetamide	C10H10N2O	174.199	0.82	Indoles and derivatives	"879-37-8"	370400
Com_207_neg	Indole-2-carboxylic acid	C9H7NO2	161.16	0.927	Indoles and derivatives	"1477-50-5"	318500
Com_1426_pos	Tryptamine	C10H12N2	160.22	5.205	Indoles and derivatives	"61-54-1"	278900
Com_1430_pos	3alpha-Dihydrocadambine	C27H34N2O10	546.574	6.61	Indoles and derivatives	"54483-84-0"	161000
Com_1260_pos	Isatin	C8H5NO2	147.13	6.37	Indoles and derivatives	"91-56-5"	84960
Com_916_pos	Tryptophol	C10H11NO	161.2	7.656	Indoles and derivatives	"526-55-6"	75050
Com_481_neg	3-Indoleacrylic acid	C11H9NO2	187.195	5.36	Indoles and derivatives	"1204-06-4"	47870
Com_1259_pos	L-5-Hydroxytryptophan	C11H12N2O3	220.22	3.05	Indoles and derivatives	"4350-09-8"	35290
Com_1008_pos	5-Methoxytryptamine	C11H14N2O	190.24	5.4	Indoles and derivatives	"608-07-1"	34360
Com_349_neg	Indolelactic acid	C11H11NO3	205.21	6.93	Indoles and derivatives	"1821-52-9"	27690
Com_177_neg	Indole-3-pyruvate	C11H9NO3	203.194	4.45	Indoles and derivatives	"392-12-1"	7339
Com_193_neg	Diallyl sulfide	C6H10S	114.21	18.46	Organosulfur compounds	"592-88-1"	142300000
Com_698_neg	Cynarin	C25H24O12	516.458	6.89	Organic Acid And Its Derivatives	"1182-34-9"	227600000
Com_175_neg	Isocitrate	C6H8O7	192.124	1.49	Organic Acid And Its Derivatives	"320-77-4"	173300000
Com_699_neg	D-Xylonic acid	C5H10O6	166.048	0.9	Organic Acid And Its Derivatives	"526-91-0"	119500000
Com_486_neg	D-threo-Isocitric acid	C6H8O7	192.124	1.41	Organic Acid And Its Derivatives	"6061-97-8"	113000000
Com_254_neg	Malonic acid	C3H4O4	104.011	1.19	Organic Acid And Its Derivatives	"141-82-2"	81710000
Com_142_neg	3-Hydroxybutyrate	C4H8O3	104.104	1.13	Organic Acid And Its Derivatives	"300-85-6"	74840000
Com_723_neg	D-Galactonic acid	C6H12O7	196.155	0.92	Organic Acid And Its Derivatives	"13382-27-9"	51320000
Com_320_neg	Methylmalonate	C4H6O4	118.09	1.938	Organic Acid And Its Derivatives	"516-05-2"	42620000
Com_1331_pos	alpha-Keto-gamma-(methylthio)butyric acid	C5H8O3S	148.18	13.57	Organic Acid And Its Derivatives	"583-92-6"	23200000
Com_544_neg	Dimethylmalonic acid	C5H8O4	132.042	0.67	Organic Acid And Its Derivatives	"595-46-0"	15970000
Com_607_neg	Glutaric Acid	C5H8O4	132.115	0.7	Organic Acid And Its Derivatives	"110-94-1"	15960000
Com_569_neg	Oxalacetic acid	C4H4O5	132.07	0.69	Organic Acid And Its Derivatives	"328-42-7"	12060000
Com_586_neg	4-Hydroxy-2-Oxoglutaric Acid	C5H6O6	162.098	0.7	Organic Acid And Its Derivatives	"1187-99-1"	11930000
Com_633_neg	Citramalate	C5H8O5	148	2.04	Organic Acid And Its Derivatives	"2306-22-1"	9706000
Com_841_pos	R-Aminobutyrate	C4H9NO2	103.12	0.91	Organic Acid And Its Derivatives	"3775-73-3"	5035000
Com_713_neg	Lactic acid	C3H6O3	90.078	1.48	Organic Acid And Its Derivatives	"50-21-5"	5015000
Com_1211_pos	D-2-Aminobutyric acid	C4H9NO2	103.12	0.947	Organic Acid And Its Derivatives	"2623-91-8"	4938000
Com_1223_pos	N-(2-Hydroxyethyl)iminodiacetic acid	C6H11NO5	177.155	1.02	Organic Acid And Its Derivatives	"93-62-9"	4100000
Com_201_neg	2,4-Dihydroxybenzoic acid	C7H6O4	154.12	4.623	Organic Acid And Its Derivatives	"89-86-1"	4052000
Com_252_neg	(2S)-2-Isopropylmalate	C7H12O5	176.068	5.52	Organic Acid And Its Derivatives	"49601-06-1"	3906000
Com_1440_pos	P-Aminohippuric Acid	C9H10N2O3	194.187	11.64	Organic Acid And Its Derivatives	"61-78-9"	3198000
Com_331_neg	2–furanoic acid	C5H4O3	112.084	1.49	Organic Acid And Its Derivatives	"88-14-2"	3024000
Com_1234_pos	Urea	CH4N2O	60.055	0.93	Organic Acid And Its Derivatives	"57-13-6"	1868000
Com_830_pos	Maleic acid	C4H4O4	116.011	0.96	Organic Acid And Its Derivatives	"110-16-7"	1687000
Com_22_neg	alpha-Benzylsuccinic acid	C11H12O4	208.211	0.71	Organic Acid And Its Derivatives	"884-33-3"	1662000
Com_1689_pos	5-Aminosalicylic Acid	C7H7NO3	153.135	1.68	Organic Acid And Its Derivatives	"89-57-6"	1370000
Com_219_neg	2-Oxoadipic acid	C6H8O5	160.037	0.72	Organic Acid And Its Derivatives	"3184-35-8"	1178000
Com_208_neg	Tartaric acid	C4H6O6	150.09	1.008	Organic Acid And Its Derivatives	"87-69-4"	1148000
Com_498_neg	Succinic anhydride	C4H4O3	100.073	0.88	Organic Acid And Its Derivatives	"108-30-5"	946900
Com_1552_pos	2-Methoxybenzoic acid	C8H8O3	152.15	7.168	Organic Acid And Its Derivatives	"579-75-9"	900600
Com_438_neg	Sinigrin	C10H16KNO9S2	397.464	1.751	Organic Acid And Its Derivatives	"3952-98-5"	883300
Com_538_neg	2,2-Dimethylsuccinic acid	C6H10O4	146.058	0.84	Organic Acid And Its Derivatives	"597-43-3"	766400
Com_250_neg	3-Ureidopropionate	C4H8N2O3	132.053	0.82	Organic Acid And Its Derivatives	"462-88-4"	751500
Com_218_neg	Adipic acid	C6H10O4	146.058	0.86	Organic Acid And Its Derivatives	"124-04-9"	684900
Com_1177_pos	2-Aminoethylphosphonate	C2H8NO3P	125.064	6.47	Organic Acid And Its Derivatives	"2041-14-7"	575500
Com_790_neg	Sebacic acid	C10H18O4	202.248	8.111	Organic Acid And Its Derivatives	"111-20-6"	556900
Com_410_neg	1,11-Undecanedicarboxylic acid	C13H24O4	244.33	10.093	Organic Acid And Its Derivatives	"505-52-2"	517100
Com_1107_pos	3-Methylcrotonylglycine	C7H11NO3	157.167	1.08	Organic Acid And Its Derivatives	"33008-07-0"	509300
Com_280_neg	O-Phosphorylethanolamine	C2H8NO4P	141.063	0.86	Organic Acid And Its Derivatives	"1071-23-4"	441400
Com_362_neg	D-Lactic acid	C3H6O3	90.08	1.44	Organic Acid And Its Derivatives	"10326-41-7"	333900
Com_604_neg	D-Ribose 5-phophate	C5H11O8P	230.11	0.89	Organic Acid And Its Derivatives	"207671-46-3"	330900
Com_1229_pos	2,6-Diaminooimelic Acid	C7H14N2O4	190.197	0.94	Organic Acid And Its Derivatives	"583-93-7"	327900
Com_590_neg	beta-Hydroxyisobutyrate	C4H8O3	104.104	2.4	Organic Acid And Its Derivatives	"2068-83-9"	292000
Com_742_neg	Phosphoenolpyruvic acid	C3H5O6P	168.042	1.04	Organic Acid And Its Derivatives		280800
Com_1228_pos	L-Homocarnosine	C10H16N4O3	240.259	6.28	Organic Acid And Its Derivatives	"3650-73-5"	280200
Com_204_neg	2-Hydroxybutyric acid	C4H8O3	104.1	2.741	Organic Acid And Its Derivatives	"600-15-7"	276700
Com_759_neg	3-Hydroxypropanoic acid	C3H6O3	90.032	1.21	Organic Acid And Its Derivatives	"503-66-2"	260100
Com_1237_pos	Coumalic acid	C6H4O4	140.094	0.72	Organic Acid And Its Derivatives	"500-05-0"	256400
Com_233_neg	L-Lactic acid	C3H6O3	90.08	1.487	Organic Acid And Its Derivatives	"79-33-4"	244000
Com_797_neg	2-Methylpentanedioic acid	C6H10O4	146.14	5.012	Organic Acid And Its Derivatives	"617-62-9"	242100
Com_567_neg	Guanidinoethyl Sulfonate	C3H9N3O3S	167.187	1.03	Organic Acid And Its Derivatives	"543-18-0"	216500
Com_261_neg	cis-4-Hydroxy-D-proline	C5H9NO3	131.13	2.26	Organic Acid And Its Derivatives	"2584-71-6"	214800
Com_257_neg	2-Hydroxyisocaproic Acid	C6H12O3	132.158	6.39	Organic Acid And Its Derivatives	"498-36-2"	189900
Com_187_neg	Phosphoenolpyruvate	C3H5O6P	167.982	0.97	Organic Acid And Its Derivatives	"138-08-9"	187200
Com_413_neg	Glycolic acid	C2H4O3	76.05	0.99	Organic Acid And Its Derivatives	"79-14-1"	183000
Com_612_neg	2-Isopropylmalic acid	C7H12O5	176.167	6.13	Organic Acid And Its Derivatives	"3237-44-3"	173700
Com_12_neg	3-Hydroxypicolinic acid	C6H5NO3	139.11	2.068	Organic Acid And Its Derivatives	"874-24-8"	170500
Com_46_neg	Hydroxycitric acid	C6H8O8	208.124	0.9	Organic Acid And Its Derivatives	"6205-14-7"	169100
Com_536_neg	2-Aminoethanesulfonic acid	C2H7NO3S	125.015	1.04	Organic Acid And Its Derivatives	"107-35-7"	152100
Com_479_neg	N-lactoyl-phenylalanine	C12H15NO4	237.25	6.97	Organic Acid And Its Derivatives		141000
Com_1441_pos	Palmitoylethanolamide	C18H37NO2	299.492	14.41	Organic Acid And Its Derivatives	"544-31-0"	137800
Com_1006_pos	Triethyl citrate	C12H20O7	276.28	9.15	Organic Acid And Its Derivatives	"77-93-0"	137700
Com_1108_pos	3-Hydroxyhippuric Acid	C9H9NO4	195.172	2.67	Organic Acid And Its Derivatives	"1637-75-8"	111200
Com_202_neg	2-Methyllactic acid	C4H8O3	104.1	2.597	Organic Acid And Its Derivatives	"594-61-6"	104000
Com_164_neg	Oxalic acid	C2H2O4	90.035	0.93	Organic Acid And Its Derivatives	"144-62-7"	95950
Com_397_neg	Vanillic acid	C8H8O4	168.15	5.901	Organic Acid And Its Derivatives	"121-34-6"	95410
Com_310_neg	Homogentisic Acid	C8H8O4	168.15	4.059	Organic Acid And Its Derivatives	"451-13-8"	90210
Com_1488_pos	Dodecanedioic acid	C12H22O4	230.3	9.452	Organic Acid And Its Derivatives	"693-23-2"	79310
Com_623_neg	3-Methyl-2-Oxobutanoic Acid	C5H8O3	116.115	1.05	Organic Acid And Its Derivatives	"759-05-7"	70400
Com_305_neg	5-hydroxyhexanoic acid	C6H12O3	132.079	7.21	Organic Acid And Its Derivatives	"185956-02-9"	68370
Com_266_neg	Acetoxyacetic acid	C4H6O4	118.027	1.89	Organic Acid And Its Derivatives	"13831-30-6"	63890
Com_763_neg	Usnic acid	C18H16O7	344.32	13.8	Organic Acid And Its Derivatives	"125-46-2"	62530
Com_969_pos	Azelaic acid	C9H16O4	188.22	7.433	Organic Acid And Its Derivatives	"123-99-9"	55430
Com_1496_pos	Alizarin	C14H8O4	240.21	9.849	Organic Acid And Its Derivatives	"72-48-0"	37990
Com_389_neg	3,4,5-Trimethoxycinnamic acid	C12H14O5	238.24	18.465	Organic Acid And Its Derivatives	"90-50-6"	29720
Com_205_neg	Levulinic acid	C5H8O3	116.12	3.489	Organic Acid And Its Derivatives	"123-76-2"	25920
Com_1406_pos	Arabidopyl ketoadipic acid	C15H14O9	338.27	15.19	Organic Acid And Its Derivatives		25730
Com_385_neg	Diethyl phosphate	C4H11O4P	154	4.2	Organic Acid And Its Derivatives	"598-02-7"	22620
Com_584_neg	4-Methylvaleric Acid	C6H12O2	116.158	0.89	Organic Acid And Its Derivatives	"646-07-1"	21440
Com_606_neg	L-Cysteinesulfinic acid	C3H7NO4S	153.16	0.88	Organic Acid And Its Derivatives	"1115-65-7"	18190
Com_373_neg	3-Hydroxy-3-methyl butyric acid	C5H10O3	118.063	0.97	Organic Acid And Its Derivatives	"625-08-1"	13820
Com_1370_pos	Hippuric Acid	C9H9NO3	179.173	6.2	Organic Acid And Its Derivatives	"495-69-2"	10470
Com_343_neg	N-Oleoyl Glycine	C20H37NO3	339.513	14.62	Organic Acid And Its Derivatives	"2601-90-3"	9756
Com_87_neg	Adenylosuccinic acid	C14H18N5O11P	463.293	0.91	Organic Acid And Its Derivatives	"19046-78-7"	5530
Com_85_neg	Ureidoisobutyric acid	C5H10N2O3	146.069	0.86	Organic Acid And Its Derivatives	"2905-86-4"	4177
Com_722_neg	Aleuritic Acid	C16H32O5	304.42	8.09	Organic Acid And Its Derivatives	"533-87-9"	4045
Com_592_neg	1-Methyluric acid	C6H6N4O3	182.137	1.04	Organic Acid And Its Derivatives	"708-79-2"	4035
Com_1317_pos	Icariside B2	C19H30O8	386.194	6.05	Organooxygen compounds	"108906-51-0"	875100
Com_1092_pos	HBOA	C8H7NO3	165.042	4.15	Organoheterocyclic compounds	"23520-34-5"	442200000
Com_198_neg	Methyl furan-2-carboxylate	C6H6O3	126.11	1.25	Organoheterocyclic compounds	"611-13-2"	38840000
Com_1566_pos	Neocnidilide	C12H18O2	194.274	11.74	Organoheterocyclic compounds	"4567-33-3"	28180000
Com_1157_pos	Zarzissine	C5H5N5	135.054	1.83	Organoheterocyclic compounds	"160568-14-9"	13590000
Com_1094_pos	10-Formyl-THF	C20H23N7O7	473.439	4.83	Organoheterocyclic compounds	"2800-34-2"	6055000
Com_1400_pos	Imidazole-4-acetate	C5H6N2O2	126.1	0.96	Organoheterocyclic compounds	"645-65-8"	5230000
Com_1497_pos	Sclareolide	C16H26O2	250.38	13.395	Organoheterocyclic compounds	"564-20-5"	1892000
Com_1121_pos	4-Methyl-5-thiazoleethanol	C6H9NOS	143.1	3.95	Organoheterocyclic compounds	"137-00-8"	1352000
Com_938_pos	2-Pyrrolidinone	C4H7NO	85.1	2.369	Organoheterocyclic compounds	"616-45-5"	1333000
Com_959_pos	Ligustilide	C12H14O2	190.238	11.865	Organoheterocyclic compounds	"4431-01-0"	1194000
Com_942_pos	Lipoamide	C8H15NOS2	205.341	4.89	Organoheterocyclic compounds	"940-69-2"	636200
Com_1165_pos	Biliverdin	C33H34N4O6	582.646	10.32	Organoheterocyclic compounds	"114-25-0"	300200
Com_1110_pos	Butylphthalide	C12H14O2	190.238	1.15	Organoheterocyclic compounds	"6066-49-5"	254000
Com_124_neg	Olaquindox	C12H13N3O4	263.253	0.96	Organoheterocyclic compounds	"23696-28-8"	216200
Com_1049_pos	Maltol	C6H6O3	126.11	5.43	Organoheterocyclic compounds	"118-71-8"	183700
Com_1386_pos	Scopine	C8H13NO2	155.19	0.87	Organoheterocyclic compounds	"498-45-3"	154900
Com_1419_pos	Pyrrole-2-carboxylic acid	C5H5NO2	111.1	5.19	Organoheterocyclic compounds	"634-97-9"	140700
Com_197_neg	4-Hydroxy-2,5-dimethyl-3(2H)furanone	C6H8O3	128.13	5.13	Organoheterocyclic compounds	"3658-77-3"	139200
Com_1322_pos	Micheliolide	C15H20O3	248.318	10.15	Organoheterocyclic compounds	"68370-47-8"	113400
Com_1617_pos	3-N-butyl-4,5-dihydrophthalide	C12H16O2	192.258	10.97	Organoheterocyclic compounds	"62006-39-7"	113100
Com_581_neg	Biopterin	C9H11N5O3	237.215	2.097	Organoheterocyclic compounds	"22150-76-1"	108500
Com_166_neg	4-Hydroxyquinazoline	C8H6N2O	146.146	5.54	Organoheterocyclic compounds	"491-36-1"	106900
Com_454_neg	7-O-Methylmangiferin	C20H20O11	436.372	6.72	Organoheterocyclic compounds	"31002-12-7"	84020
Com_577_neg	Quinolinic acid	C7H5NO4	167.12	1.551	Organoheterocyclic compounds	"89-00-9"	67080
Com_987_pos	1'-Hydroxymidazolam	C18H13ClFN3O	341.772	5.9	Organoheterocyclic compounds	"59468-90-5"	35310
Com_1647_pos	Sec-O-Glucosylhamaudol	C21H26O10	438.425	8.108	Organoheterocyclic compounds	"80681-44-3"	33550
Com_61_neg	Allantoin	C4H6N4O3	158.115	0.94	Organoheterocyclic compounds	"97-59-6"	30940
Com_1363_pos	Kojic acid	C6H6O4	142.11	2.388	Organoheterocyclic compounds	"501-30-4"	20350
Com_988_pos	Deoxynojirimycin	C6H13NO4	163.173	0.73	Organoheterocyclic compounds	"19130-96-2"	15080
Com_727_neg	Mollugin	C17H16O4	284.312	9.08	Organoheterocyclic compounds	"55481-88-4"	8704
Com_1010_pos	Bis(2-methyl-3-furyl)disulphide	C10H10O2S2	226.32	11.57	Organoheterocyclic compounds	"28588-75-2"	7865
Com_41_neg	Polyphyllin V	C39H62O12	722.914	11.85	Saponin	"19057-67-1"	363600
Com_67_neg	Polyphyllin Vii	C51H84O22	1049.2	1	Saponin	"68124-04-9"	48140
Com_861_pos	Timosaponin A1	C33H54O8	578.787	5.1	Saponin	"68422-00-4"	7289
Com_1415_pos	Diethyl glutarate	C9H16O4	188.105	0.67	Fatty Acyls	"818-38-2"	408000000
Com_1541_pos	Oleamide	C18H35NO	281.477	15.12	Fatty Acyls	"301-02-0"	148500000
Com_471_neg	Undecanoic acid	C11H22O2	186.162	6.17	Fatty Acyls	"112-37-8"	49910000
Com_1362_pos	6-Aminocaproic acid	C6H13NO2	131.095	2.07	Fatty Acyls	"60-32-2"	37640000
Com_1187_pos	Punicic acid	C18H30O2	278.3	12.65	Fatty Acyls	"544-72-9"	36790000
Com_1239_pos	Octadecadien-6-ynoic acid	C18H28O2	276.2	12.1	Fatty Acyls		32610000
Com_1096_pos	14,15-Dehydrocrepenynic acid	C18H28O2	276.414	12.15	Fatty Acyls	"4154-44-3"	31650000
Com_1633_pos	Alpha-Linolenic acid	C18H30O2	278.435	12.64	Fatty Acyls	"463-40-1"	28370000
Com_1304_pos	Octadeca-11E,13E,15Z-trienoic acid	C18H30O2	278.2	13.5	Fatty Acyls	"25575-00-2"	26950000
Com_540_neg	Eicosadienoic acid	C20H36O2	308.272	6.32	Fatty Acyls	"5598-38-9"	13660000
Com_1591_pos	2-Methoxyhexadecanoate	C17H34O2	270.451	0.97	Fatty Acyls	"112-39-0"	8636000
Com_28_neg	9,10,13-Trihydroxyoctadec-11-enoic acid	C18H34O5	330.241	9.12	Fatty Acyls	"29907-57-1"	7476000
Com_635_neg	12,13-EODE	C18H32O3	296	12.67	Fatty Acyls		6820000
Com_514_neg	Methylenesuccinic acid	C5H6O4	130.099	4.25	Fatty Acyls	"97-65-4"	6490000
Com_608_neg	Linolelaidic Acid (C18:2N6T)	C18H32O2	280.445	15.16	Fatty Acyls	"506-21-8"	3908000
Com_615_neg	Heptadecanoic acid	C17H34O2	270.256	10.53	Fatty Acyls	"506-12-7"	3487000
Com_288_neg	13(S)-HOTrE	C18H30O3	294.2	12.07	Fatty Acyls	"87984-82-5"	2177000
Com_488_neg	9-KODE	C18H30O3	294.2	12.07	Fatty Acyls	"54232-59-6"	2088000
Com_19_neg	9(S)-HOTrE	C18H30O3	294.429	12.07	Fatty Acyls	"89886-42-0"	1955000
Com_1417_pos	Methyl linoleate	C19H34O2	294.47	13.221	Fatty Acyls	"112-63-0"	1765000
Com_1290_pos	Sorbic acid	C6H8O2	112.127	6.72	Fatty Acyls	"110-44-1"	1582000
Com_636_neg	13-HPODE	C18H32O4	312.1	11.45	Fatty Acyls	"33964-75-9"	994500
Com_407_neg	Hexadecanedioic acid	C16H30O4	286.41	11.908	Fatty Acyls	"505-54-4"	844700
Com_249_neg	3-Hydroxyoctadecanoic Acid	C18H36O3	300.267	13.6	Fatty Acyls	"45261-96-9"	843200
Com_25_neg	(9Z,11E)-Octadecadienoic acid	C18H32O2	280.24	4.33	Fatty Acyls	"2540-56-9"	842400
Com_1608_pos	1-Linoleoyl-Rac-Glycerol	C21H38O4	354.524	12.05	Fatty Acyls	"2277-28-3"	801900
Com_10_neg	3-Methyladipic acid	C7H12O4	160.17	5.747	Fatty Acyls	"3058-01-3"	731000
Com_323_neg	Tiglic acid	C5H8O2	100.12	18.476	Fatty Acyls	"80-59-1"	505100
Com_191_neg	13-HpOTrE(r)	C18H30O4	310	10.93	Fatty Acyls	"121107-97-9"	471000
Com_1664_pos	Maltitol	C12H24O11	344.31	0.914	Fatty Acyls	"585-88-6"	438300
Com_1387_pos	Linoleic acid	C18H32O2	280.445	14.46	Fatty Acyls	"60-33-3"	405600
Com_1183_pos	Palmitoleic Acid	C16H30O2	254.408	10.9	Fatty Acyls	"373-49-9"	358100
Com_1275_pos	1-Monopalmitin	C19H38O4	330.503	11.26	Fatty Acyls	"19670-51-0"	304800
Com_327_neg	Desthiobiotin	C10H18N2O3	214.262	6.93	Fatty Acyls	"533-48-2"	292800
Com_599_neg	Ellagic acid	C14H6O8	302.19	6.54	Fatty Acyls	"476-66-4"	288100
Com_244_neg	cis-Vaccenic acid	C18H34O2	282.256	15.78	Fatty Acyls	"506-17-2"	219600
Com_637_neg	9(S)-HpOTrE	C18H30O4	310.1	10.92	Fatty Acyls	"111004-08-1"	174900
Com_1416_pos	Methyl linolenate	C19H32O2	292.46	16.057	Fatty Acyls	"301-00-8"	159800
Com_199_neg	Gamma-Linolenic Acid	C18H30O2	278.43	14.62	Fatty Acyls	"506-26-3"	151500
Com_112_neg	D-2-Hydroxyisocaproate	C6H12O3	132.079	7.12	Fatty Acyls	"20312-37-2"	139500
Com_594_neg	5Z,8Z,11Z,14Z-Eicosatetraenoic acid	C20H24D8O2	312.516	7.28	Fatty Acyls	"69254-37-1"	121100
Com_821_pos	Methyl Dihydrojasmonate	C13H22O3	226.31	11.66	Fatty Acyls	"24851-98-7"	117900
Com_188_neg	Myristoleic acid	C14H26O2	226	8.46	Fatty Acyls	"544-64-9"	111200
Com_991_pos	delta-Tridecalactone	C13H24O2	212.3	9.2	Fatty Acyls	"7370-92-5"	107900
Com_638_neg	13-HOTrE(r)	C18H30O3	294	11.36	Fatty Acyls	"74784-20-6"	99930
Com_449_neg	2-Hydroxy-2-methylbutanoic acid	C5H10O3	118.13	4.61	Fatty Acyls	"3739-30-8"	99370
Com_639_neg	Lauric Acid	C12H24O2	200.32	7.28	Fatty Acyls	"143-07-7"	84520
Com_52_neg	Palmitaldehyde	C16H32O	240.425	10.22	Fatty Acyls	"629-80-1"	83490
Com_502_neg	Manninotriose	C18H32O16	504.437	0.9	Fatty Acyls	"13382-86-0"	81940
Com_139_neg	trans-9-Octadecenoic acid	C18H34O2	282.461	12.86	Fatty Acyls	"112-79-8"	65910
Com_1180_pos	2-Amino-1,3,4-tetradecanetriol	C14H31NO3	261.4	1.18	Fatty Acyls		62630
Com_788_neg	12(13)-EpOME	C18H32O3	296.235	12.61	Fatty Acyls	"6799-85-5"	61980
Com_685_neg	9S-Hydroxy-10E,12Z-octadecadienoic acid	C18H32O3	296.235	12.61	Fatty Acyls	"15514-85-9"	60400
Com_470_neg	13(S)-HODE;13(S)-Hydroxyoctadeca-9Z,11E-dienoic acid	C18H32O3	296.235	12.61	Fatty Acyls	"10219-69-9"	56970
Com_965_pos	9,17-Octadecadiene-12,14-diyne-1,11,16-triol	C18H26O3	290.397	13.78	Fatty Acyls	"211238-60-7"	46780
Com_113_neg	ethylmalonate	C5H8O4	132.042	1.82	Fatty Acyls	"601-75-2"	39170
Com_234_neg	Arachidonic acid	C20H32O2	304.47	6.881	Fatty Acyls	"506-32-1"	33410
Com_411_neg	Cistanoside F	C21H28O13	488.445	5.02	Fatty Acyls	"97411-47-7"	24080
Com_376_neg	Methyl myristate	C15H30O2	242.397	8.04	Fatty Acyls	"124-10-7"	18970
Com_74_neg	Rosavin	C20H28O10	428.43	6.92	Fatty Acyls	"84954-92-7"	17390
Com_513_neg	Myristic acid	C14H28O2	228.371	6.1	Fatty Acyls	"544-63-8"	17220
Com_1583_pos	Roseoside	C19H30O8	386.437	1.09	Fatty Acyls	"54835-70-0"	14020
Com_687_neg	(7S,8S)-DiHODE	C18H32O4	312.23	1.3	Fatty Acyls	"143288-65-7"	13730
Com_1592_pos	Methyl heptadecanoate	C18H36O2	284.477	15.09	Fatty Acyls	"1731-92-6"	13220
Com_897_pos	D-Panthenol	C9H19NO4	205.131	4.7	Fatty Acyls	"81-13-0"	12370
Com_414_neg	Tuberonic Acid	C12H18O4	226.121	0.92	Fatty Acyls	"124649-26-9"	9874
Com_68_neg	Trans,Trans-Muconic Acid	C6H6O4	142.109	0.99	Fatty Acyls	"3588-17-8"	9555
Com_472_neg	Sodium Valproate	C8H15NaO2	166.097	5.01	Fatty Acyls	"1069-66-5"	7991
Com_645_neg	DL-Panthenol	C9H19NO4	205.25	4.647	Fatty Acyls	"16485-10-2"	2196
Com_458_neg	GA7-1			9.22	Phytohormones		10500000
Com_388_neg	Salicylic acid O-glucoside	C13H16O8	300.1	4.14	Phytohormones	"10366-91-3"	5217000
Com_1629_pos	1-Aminocyclopropanecarboxylic acid	C4H7NO2	101.1	0.894	Phytohormones	"22059-21-8"	4813000
Com_1230_pos	iP9G	C16H23N5O5	365.384	1	Phytohormones	"83087-94-9"	2266000
Com_478_neg	12OHJA-Ile-1			7.8	Phytohormones		1814000
Com_1240_pos	iP7G		365.2	1	Phytohormones		1742000
Com_563_neg	Salicylic acid	C7H6O3	138.12	7.67	Phytohormones	"69-72-7"	1716000
Com_1312_pos	Isopentenyl adenosine	C15H21N5O4	335.358	6.814	Phytohormones	"7724-76-7"	1042000
Com_259_neg	Jasmonic acid	C12H18O3	210.27	8.98	Phytohormones	"3572-66-5"	851500
Com_1421_pos	IAA-Glu	C15H16N2O5	304.298	0.72	Phytohormones		565100
Com_967_pos	Indole-3-acetic acid	C10H9NO2	175.18	7.567	Phytohormones	"87-51-4"	430300
Com_1345_pos	tZROG	C21H31N5O10	513.498	5.2	Phytohormones	"62512-97-4"	422200
Com_619_neg	Abscisic Acid	C15H20O4	264.32	8.13	Phytohormones	"21293-29-8"	343200
Com_425_neg	(-)-Jasmonoyl-L-isoleucine	C18H29NO4	323.21	9.94	Phytohormones	"120330-93-0"	318400
Com_1420_pos	IAA-Asp	C14H14N2O5	290.271	6.78	Phytohormones		208000
Com_998_pos	Dihydrozeatin	C10H15N5O	221.259	4.673	Phytohormones	"23599-75-9"	197600
Com_757_neg	N-[(-)-Jasmonoyl]-(L)-Isoleucine	C18H29NO4	323.401	9.96	Phytohormones		147400
Com_1188_pos	trans-zeatin N-glucoside	C16H23N5O6	381.2	4.62	Phytohormones		128600
Com_1244_pos	trans-zeatin 9-O-glucoside	C16H23N5O6	381.1	4.49	Phytohormones		127600
Com_1654_pos	DHZROG	C21H33N5O10	515.514	1.01	Phytohormones	"62512-95-2"	67680
Com_287_neg	Zeatin riboside,trans-isomer	C15H21N5O5	351.358	1.16	Phytohormones	"28542-78-1"	19550
Com_573_neg	(+)-Dihydrojasmonic acid	C12H20O3	212.285	9.596	Phytohormones	"76968-33-7"	4976
