# Supplementary material for: Metabolome and microbiome analyses of the anti-fatigue mechanism ofAcanthopanax senticosusleaves
Source: Royal Society of Chemistry journal article supplement (doi:10.1039/d3fo05311c), 2024-01-01
Supplement: d3fo05311c3.xlsx [file d3fo05311c3.xlsx]

## Sheet: Urine
		-2.02527	-2.02027	-2.01527	-2.01027	-2.00527	-2.00027	-1.99527	-1.99028	-1.98528	-1.98028	-1.97528	-1.97028	-1.96528	-1.96028	-1.95528	-1.95028	-1.94528	-1.94028	-1.93528	-1.93028	-1.92528	-1.92028	-1.91529	-1.91029	-1.90529	-1.90029	-1.89529	-1.89029	-1.88529	-1.88029	-1.87529	-1.87029	-1.86529	-1.86029	-1.85529	-1.85029	-1.84529	-1.8403	-1.8353	-1.8303	-1.8253	-1.8203	-1.8153	-1.8103	-1.8053	-1.8003	-1.7953	-1.7903
EC1	EC	0	0	0	0.00453218	0.00925639	0.0100957	0.00959756	0.00902689	0.00853091	0.00820971	0.00794377	0.00747843	0.00729366	0.00646284	0.00592903	0.00523147	0.00492081	0.00470962	0.00445011	0.0042156	0.00370648	0.00336151	0.00314171	0.00257557	0.00219938	0.00141779	0.00105056	0.0011118	0.000880273	0.000852856	0.000631313	0.000369058	0.000361244	0.000140767	-0.00015926	-0.000273126	6.1e-05	0.000158476	-0.000441143	-0.000665038	-0.000980144	-0.000563252	-0.000580412	-0.000564019	-0.000315705	-0.000653456	-0.00071461	-0.000742502
EC2	EC	0	0	0	0.000999476	0.0018507	0.00141637	0.00183263	0.00178118	0.00172448	0.00203341	0.00199908	0.0019518	0.00179928	0.00131862	0.00105795	0.00125219	0.00126302	0.00150559	0.00111479	0.000764078	0.000783629	0.000964465	0.00113729	0.000627627	0.00056039	0.00034884	0.000329593	0.0004572	-2.12e-06	0.000390708	0.000472027	0.000388595	0.000100847	-0.000105183	0.000264775	0.000276143	-0.000492221	-0.000261856	0.000116987	0.000323183	0.000689842	0.00048239	-0.000240377	0.000318974	0.000140918	-1.58e-05	5.98e-06	0.000110397
EC3	EC	0	0	0	-0.000510375	-0.00111642	-0.00132314	-0.00106943	-0.00104623	-0.00132882	-0.00118792	-0.000947096	-0.0010454	-0.00116829	-0.00111381	-0.00116584	-0.000888254	-0.000755666	-0.000575375	-0.000457745	-0.000376369	-0.000394647	-0.000422003	-3.92e-05	0.000294668	0.000274844	-0.000145568	-0.000182034	4.75e-05	-1.9e-06	-0.000180905	-0.00055229	-0.000233957	-0.000134074	-0.000190036	-4.48e-05	6.5e-06	-0.000383412	-0.000604686	0.000125658	0.000264637	7.4e-05	-4.53e-05	9.79e-05	7.3e-05	6.43e-05	0.000126965	-0.000288516	5.72e-05
EC4	EC	0	0	0	0.00161607	0.00354975	0.00400235	0.00375283	0.00365951	0.00342839	0.00326561	0.00309651	0.00259637	0.00250247	0.00231267	0.00204288	0.00180741	0.00194999	0.00196736	0.00168942	0.00114224	0.00104725	0.00120182	0.00124079	0.00096583	0.000712135	0.000541868	0.000455579	0.000222901	-4.15e-05	0.000244703	0.000156243	-0.000131122	-0.000160561	-0.000237461	1.81e-05	0.000251985	-4.2e-05	-0.000517681	-0.000537026	-0.000270158	-0.000174306	-0.00021204	-0.000512819	-0.000342559	-5.78e-05	-0.000195208	-0.00037702	-0.000353619
EC5	EC	0	0	-2.49e-05	-0.00100525	-0.0015173	-0.00155686	-0.00123821	-0.00102748	-0.000925162	-0.000746025	-0.000731791	-0.000896615	-0.000657211	-0.00102483	-0.000359691	-0.000715505	-0.000822001	-0.000445724	-0.000128444	-0.000792925	-0.000435241	-0.000579411	-0.000324484	-0.000157938	-0.000416486	-0.000377719	0.00021957	0.000132102	-0.000162292	-0.00038558	-0.000409878	-9.27e-05	-5.69e-05	0.000108329	0.000470187	-0.000232151	0.00037084	-0.000397737	4.43e-05	0.000265428	0.000242379	0.00018807	3.29e-06	0.000523827	0.000377688	0.000246318	0.000414246	-4.69e-05
NC1	NC	0	0	0	0.000302374	0.000188208	0.000275209	0.000191938	0.000431679	0.00042293	0.000437719	0.000390277	0.000498934	0.000328976	0.000248366	0.000132015	3.87e-05	0.000188365	0.000266297	0.000110834	0.000190456	0.000215767	0.000175913	5.19e-05	-7.8e-05	8.75e-05	0.000227448	-3.47e-05	4.78e-05	0.000210912	0.000200217	0.000166495	0.000126628	0.00022835	-1.09e-05	-3.27e-05	-9.59e-05	-1.15e-05	0.000139998	0.000163608	-0.000109007	-2.42e-05	0.000212458	3.99e-05	0.000376365	0.000137026	7.68e-05	8.26e-05	0.00026216
NC2	NC	0	0	0	-0.000157138	-0.000136429	-8.68e-05	-5.53e-05	-0.000147742	-9.54e-05	-0.000218332	-0.000204278	-0.000295282	-0.000164652	-0.000111215	-9.55e-05	8.15e-06	-5.92e-05	-6.35e-05	-2.48e-06	8.4e-05	0.000123568	0.000162111	-0.000164646	-4.62e-05	0.000135064	0.000100343	0.00016529	-5.21e-05	0.000248002	0.000401617	0.000136467	0.000311825	7.43e-05	0.000363369	0.000254552	0.000241043	0.000251436	0.000313369	-4.7e-05	9.87e-05	0.00012379	-0.000213159	0.000171825	0.000217558	0.000224449	0.000248395	5.96e-05	0.000390991
NC3	NC	0	0	0.00287004	0.00702818	0.00823223	0.00789952	0.00749985	0.00706151	0.00652758	0.00604465	0.00580666	0.00554937	0.00516989	0.00461632	0.00403611	0.00388965	0.00369429	0.00329277	0.00295987	0.0026362	0.00251134	0.00241006	0.00207369	0.0017876	0.00169426	0.00147604	0.00131145	0.000966701	0.000575764	0.000704413	0.00059106	0.000345387	0.000364842	-3.47e-05	-0.00027946	-0.000151789	-0.000263519	-0.000220678	-0.000328774	-0.000476858	-0.00051211	-0.000429594	-0.000317725	-0.000467298	-0.000596983	-0.000648516	-0.000712854	-0.000470871
NC4	NC	0	0	0	0	0	0.00174214	0.00262672	0.00315648	0.00302862	0.00250414	0.00219301	0.0029263	0.00265081	0.0024217	0.00220852	0.00286096	0.00167839	0.00184088	0.00176557	0.00182543	0.00160251	0.00164891	0.00176357	0.00182492	0.00136112	0.00132877	0.00104397	0.000723471	0.000940902	0.00130894	0.000698429	0.000366889	0.000392985	0.000395147	0.00107402	0.000375478	0.000540661	0.00064295	0.000557856	0.000214767	0.000757995	0.000167933	0.000968496	7.99e-06	-0.000154298	0.000374854	0.000108739	0.000474206
NC5	NC	0	0	0	0.000464672	0.00128654	0.00146892	0.0011568	0.00113329	0.00109036	0.000985276	0.00128791	0.00110613	0.000682287	0.000832842	0.000846271	0.000813375	0.000697924	0.000508899	0.000581752	0.000674775	0.00037839	9.64e-06	0.000448309	0.000454686	-8.66e-05	5.01e-05	0.000207664	4.82e-05	2.9e-05	0.000132386	2.16e-05	0.000260424	0.000487563	7.07e-05	0.000224445	0.000570382	0.000428992	0.000307826	0.000119359	0.000124099	3.19e-05	-0.000186724	2.85e-05	0.000252984	0.000118843	-1.55e-06	-9.36e-05	-0.000222071
ASLEH1	ASLEH	0	0	0.00169593	0.0034031	0.00380755	0.00364321	0.00350974	0.00324782	0.00307395	0.00279105	0.00268926	0.0026459	0.00236258	0.00204201	0.00171921	0.00182327	0.00180406	0.00153881	0.00145439	0.00137046	0.00125766	0.000964217	0.000937983	0.000792181	0.00072206	0.000696286	0.000585906	0.000640403	0.000576468	0.000445479	0.000292129	0.000217484	0.000160805	6.33e-05	5.6e-05	-0.000168504	-0.000173684	-0.000304008	-0.000128471	-5.93e-05	2.98e-05	-5.07e-05	-0.00020045	-0.000230239	-0.000249139	-0.000295312	-0.000316981	-0.000353344
ASLEH2	ASLEH	0	0	0	0.00259194	0.00397614	0.00391246	0.00370533	0.00337735	0.00313044	0.00332996	0.00316344	0.00293722	0.00253051	0.00243706	0.00233598	0.0020472	0.00210267	0.00173426	0.00162834	0.00132622	0.00122885	0.00140034	0.000941787	0.000957746	0.00091818	0.000640541	0.000407641	0.000545249	0.000471111	0.000432701	0.000465956	0.000212141	8.45e-05	0.000119708	-5e-05	-0.000281641	-0.00010842	-0.000245835	-0.000317726	-0.000215062	-9.96e-05	9.59e-05	-8.62e-05	-0.000363796	-0.000502516	-0.000305264	-0.000109616	-0.000322197
ASLEH3	ASLEH	0	0	0.000353377	0.000835791	0.00104132	0.00103611	0.000923557	0.000883191	0.000920103	0.000931525	0.000796415	0.000783707	0.000794683	0.000655643	0.000618074	0.000607165	0.000582633	0.000552462	0.000387786	0.000301387	0.000393352	0.000445783	0.00042468	0.000351037	0.000366639	0.000320465	0.000183449	0.000180363	0.000124866	0.000243768	0.000407187	0.000326614	0.000215306	0.000246252	0.00019892	0.000148711	0.000143508	0.000154648	0.000173963	0.000273463	9.04e-05	1.87e-05	-4.88e-05	0.000105958	0.000192761	5.58e-05	-5.48e-06	7.73e-05
ASLEH4	ASLEH	0	0	0.000517302	0.00352418	0.00523373	0.00488631	0.00467776	0.00442738	0.00417701	0.00382945	0.00349229	0.00348888	0.00315144	0.00284958	0.00268863	0.00254328	0.00234454	0.0019714	0.00200366	0.00167421	0.00146393	0.00156976	0.00132394	0.00140196	0.00107369	0.000926048	0.000844403	0.000988243	0.000680935	0.000416067	0.000434433	0.000132416	5.97e-05	-0.000135276	-2.31e-05	6.49e-06	-5.24e-05	-0.000181989	-0.000397338	-0.000149068	-0.000280839	-0.000367885	-0.000486627	-0.000521254	-0.000391058	-0.000198771	-7.12e-05	-0.000211592
ASLEH5	ASLEH	0	0	0.0010345	0.00163732	0.00178012	0.00181318	0.00179083	0.00159687	0.00157669	0.00155633	0.0013439	0.00129144	0.00121785	0.00114182	0.000996193	0.000857484	0.000901757	0.000798618	0.000729846	0.000697498	0.000504174	0.000470267	0.000268186	0.00043138	0.000205005	0.000231024	0.000328224	0.000222491	-3.13e-05	-9.15e-05	-5.51e-05	2.65e-05	-1.93e-05	-0.000155732	-4.57e-05	-0.000114466	-0.00025174	6.23e-05	4.59e-05	-0.000150627	-0.000258385	-0.000224666	-5.17e-05	-0.000119119	-0.000267995	-0.000275852	-0.000209562	-0.000173232
[truncated: 2,593 more columns]

## Sheet: Small intestine contents
		-1.98239	-1.97739	-1.97239	-1.96739	-1.96239	-1.95739	-1.95239	-1.94739	-1.94239	-1.9374	-1.9324	-1.9274	-1.9224	-1.9174	-1.9124	-1.9074	-1.9024	-1.8974	-1.8924	-1.8874	-1.8824	-1.8774	-1.8724	-1.8674	-1.8624	-1.8574	-1.8524	-1.8474	-1.8424	-1.8374	-1.8324	-1.8274	-1.8224	-1.8174	-1.8124	-1.8074	-1.8024	-1.7974	-1.7924	-1.7874	-1.7824	-1.7774	-1.7724	-1.7674	-1.7624	-1.7574	-1.7524	-1.7474
EC1	EC	0	4.87e-05	0.000323321	0.000398228	0.000423667	0.000367265	0.000433282	0.000400348	0.000325088	0.00027847	0.000277785	0.000328892	0.000264321	0.000204492	0.000232514	0.000233961	0.000223579	0.000215113	0.000148214	4.93e-05	9.56e-05	0.00011108	0.00012164	7.88e-05	7.99e-05	0.000127394	5.12e-05	8.27e-05	0.000106632	2.62e-05	-0.00012804	-0.00012495	8.27e-05	-3.12e-05	-2.41e-05	1.38e-05	2.22e-06	6.31e-05	0.000126339	6.07e-05	-5.89e-05	-1.58e-05	1.02e-05	-9.71e-06	6.04e-06	-2.81e-05	-1.5e-05	-9.19e-06
EC2	EC	0	0.000267682	0.00119077	0.00161459	0.00153438	0.0014254	0.00139248	0.00120259	0.00110643	0.00117019	0.0010817	0.00106042	0.000892957	0.000791604	0.000798241	0.000668398	0.000663975	0.00060954	0.000620196	0.000499139	0.00043841	0.000329085	0.000331452	0.000157676	0.000256067	0.000268607	0.000191391	0.000180426	0.00015961	6.57e-05	-3.43e-05	-4.61e-05	-8.7e-05	9.76e-06	7.84e-05	-6.49e-05	-0.000168402	-0.000260936	-0.000242416	-0.00017661	5.7e-06	-0.00018164	-0.000139551	-0.000108	-9.27e-05	-2.42e-05	-8.91e-05	-0.000215947
EC3	EC	0	0.000310893	0.000697687	0.000817043	0.000799923	0.000758711	0.000765329	0.000715888	0.000733721	0.000734802	0.00064743	0.000635768	0.000577046	0.000445824	0.000409092	0.000346493	0.000291303	0.000315282	0.000330788	0.000284949	0.000215416	0.000169714	0.000199324	0.000188083	0.000127444	0.000141378	0.000144844	0.000127959	0.000112825	8.91e-05	6.45e-05	4.79e-05	-3.41e-05	-0.000109533	-0.000177668	-0.000146878	-8.77e-06	-0.000104294	-6.03e-05	1.82e-05	-0.000189105	-0.000241768	-0.000206932	-0.000154353	-0.000102561	-0.000172373	-0.000160079	-6.05e-05
EC4	EC	0	0	0.000550668	0.00115465	0.0012207	0.0011035	0.00102879	0.00102249	0.000962028	0.000882029	0.000838874	0.000834183	0.000771972	0.000780108	0.000697119	0.000618772	0.000557939	0.000474812	0.000442317	0.000350515	0.00031795	0.000388255	0.000348009	0.000295549	0.000330446	0.000351066	0.000240796	-6.8e-06	-4.23e-05	9e-05	0.000199165	0.000113234	-3.49e-05	-4.45e-05	-9.02e-06	-4.61e-05	8.14e-06	-4.55e-05	1.4e-05	4.07e-06	-7.61e-05	-8.62e-05	-0.000139567	-0.000155749	-0.000147093	-9.15e-05	-6.21e-05	-2.89e-05
EC5	EC	0	-4.06e-05	-5.38e-05	-4.91e-05	-7.72e-05	-4.98e-05	-1.77e-05	-9.11e-05	-3.61e-05	0.0001	2.93e-05	-5.45e-07	2.75e-05	-6.3e-05	-3.99e-05	2.98e-05	1.45e-05	-5.15e-05	-8.72e-05	-6.1e-05	-6.16e-05	-8.33e-05	-4.04e-05	2.38e-05	-3.34e-05	-0.000148267	-0.000138235	-0.00010905	-6.72e-05	-0.000138465	-0.000101325	5.37e-05	4.4e-05	2.35e-05	-2.28e-06	3.04e-05	-7.55e-07	-4.75e-05	5.86e-05	0.000112272	-2.16e-05	-9.65e-05	-0.000155209	-0.000155552	-0.000141384	-7.51e-05	-4.78e-05	1.35e-05
NC1	NC	-8.54e-05	-9.69e-05	-0.000219525	-0.000153445	-6.37e-05	-4.31e-05	-4.83e-05	-0.000101138	-0.000115539	-8.19e-05	-0.000121935	-0.000164586	-0.000223513	-0.000246319	-0.000264542	-8.48e-05	-0.000125252	-0.000141598	-0.000176658	-6.84e-05	0.000162466	9.43e-05	-6.24e-05	-0.000128189	-3.88e-05	0.000233259	5.1e-05	-0.000119269	-0.000129207	2.73e-05	-3.71e-05	-0.000139181	-0.000276552	-0.000167655	-6.59e-05	-0.000137834	-0.000103934	-0.000125582	-0.000184162	-2.88e-05	-0.00030137	-0.000328521	-0.000209304	-0.000108583	-0.000131522	1.37e-05	0.000149394	5.06e-05
NC2	NC	-1.47e-05	-9.76e-05	-0.000145744	-2.18e-05	-2.58e-05	-0.000112633	-0.000129242	-2.9e-05	-1.16e-05	-2.62e-05	-7.23e-05	-0.000109014	-5.68e-05	-6.06e-05	-2.02e-05	1.88e-05	-3.53e-05	-3.95e-05	-3.32e-05	-8.32e-05	-0.000101626	-6.46e-05	-3.83e-05	-1.7e-05	-0.000165687	-0.000187925	-7.64e-05	-2.62e-05	-0.00010083	-0.00011111	-8.08e-05	-8.45e-05	-0.000141174	3.24e-05	4.74e-05	-2.16e-05	-0.000184353	-0.000121348	-4.03e-05	2.27e-05	1.04e-05	-0.000139782	-0.000177555	-0.000134413	-1.71e-05	-9.33e-06	-0.000173885	-0.000188403
NC3	NC	-1.66e-05	-4.23e-05	-2.26e-05	-8.88e-05	-0.000143728	-4.76e-05	-6.02e-05	-5.8e-05	3.28e-05	5.37e-05	-5.65e-05	-0.000128472	1.46e-05	6.84e-05	-6.23e-05	-7.98e-05	-8.45e-05	-6.15e-05	-3.53e-05	6.16e-05	1.79e-05	3.33e-05	-9.21e-06	-7.66e-05	-9.88e-05	0.000104225	1.26e-06	5.93e-05	4.28e-05	4.98e-06	-1.56e-05	3.98e-06	1.26e-05	-8.74e-05	-3.2e-05	-5.02e-05	1.66e-05	-5.19e-05	-9.72e-05	-0.000202839	-0.000153566	-0.000101283	-5.69e-05	-4.62e-05	-0.000101439	-6.36e-05	-3.94e-05	-0.000140771
NC4	NC	-0.000108716	-0.000252184	-0.000363381	-0.000315987	-0.00023554	-0.000280273	-0.00023993	-0.000304652	-0.000224237	-0.000227067	-0.00018035	-0.000166368	-9.84e-05	-0.000107301	-0.000133511	-8.97e-05	-6.85e-05	-5.05e-05	-3.86e-05	-0.000110729	-0.000255512	-0.000201558	-9.74e-06	-6.9e-05	-0.000129289	-4.95e-05	-7.38e-07	-0.000100073	-2.9e-05	0.000116679	9.57e-05	-8.13e-05	2.21e-05	9.24e-05	-8.86e-05	-0.000162434	-0.000192954	-0.000157101	-0.000145667	-0.000153259	4e-05	6.57e-07	-8.84e-05	-3.28e-05	-8.19e-05	-0.000264857	-9.97e-05	3.13e-07
NC5	NC	4.97e-05	0.000593684	0.000840181	0.000755378	0.000670409	0.000744187	0.000645061	0.00058741	0.000558973	0.000674992	0.000665622	0.000421521	0.000315692	0.000452033	0.000370709	0.000406507	0.000331992	0.000159008	0.000220522	0.000138691	7.33e-05	0.000111438	0.000238694	0.000127691	8.45e-05	6.57e-05	0.000123406	0.000185892	-5.79e-05	-7.16e-05	-1.05e-05	-0.000322975	-0.00028658	-2.61e-05	-0.000106203	-0.00021693	-8.56e-05	-0.000184719	-0.000188972	-0.000172331	-0.000111647	-0.000160099	-0.000136176	-9.96e-05	-0.000386191	-0.000160527	-0.000187222	-0.000337607
ASLEH1	ASLEH	0	-3.32e-06	-1.24e-05	3.4e-05	-2.71e-05	-0.000134232	-0.000188864	-1.18e-05	2.8e-05	-5.51e-05	-0.000105025	-2.49e-05	-0.000174801	7.08e-06	-2.3e-06	-5.76e-05	-0.000142327	-8.75e-05	-7.27e-05	-9.32e-05	6.26e-06	1.53e-06	-9.42e-05	-2.7e-05	-0.000244515	-0.00012531	-7.67e-05	-1.61e-05	-0.000113805	-6.26e-05	-4.06e-05	6.79e-05	8.21e-05	-3.65e-05	-0.000198063	6.18e-05	1.91e-05	-5.34e-05	-0.000266118	-8.53e-05	-8.4e-05	-2.15e-05	-0.00014047	-2.06e-06	6.66e-05	-5.51e-05	-7.1e-05	1.13e-06
ASLEH2	ASLEH	-1.1e-05	-0.000119396	-0.000111416	-6.16e-05	-2.59e-05	-3.77e-05	-0.000111246	-0.000204931	-3.24e-05	-7.36e-05	-6.03e-05	-0.000152056	-0.000100206	-0.000110576	-5.25e-05	-2.68e-05	-0.000108306	1.67e-05	9.85e-06	-6.69e-06	4.3e-05	-8.38e-05	-0.000106129	-0.000191141	-9.14e-05	8.46e-05	-3.89e-05	-1.84e-05	-0.000110262	9.19e-05	-0.000112094	5.96e-05	3.54e-05	-2.66e-05	-0.000146242	-8.39e-05	7.63e-05	-0.000109457	-4.77e-05	-1.14e-05	4.02e-05	0.000152638	-7.67e-05	1.55e-05	7.88e-05	7.22e-05	-1.21e-05	2.78e-06
ASLEH3	ASLEH	0.000128067	0.000299603	0.000400596	0.00036093	0.000240683	0.000237631	0.000193753	0.000129711	0.000222298	0.000199829	0.0002101	0.000218528	6.29e-05	-2.12e-06	8.68e-05	5.04e-05	-2.43e-05	3.5e-05	3.81e-05	9.75e-05	4.08e-06	-2.41e-06	0.000113934	5.71e-05	-4.61e-05	4.69e-05	0.000107471	7.49e-05	5.7e-05	-9.11e-05	-3.35e-05	8.96e-05	3.36e-05	-2.81e-05	6.48e-05	0.000122803	6.02e-05	6.22e-05	-6.76e-05	-0.000143819	2.83e-06	-3.43e-05	-0.000135452	-3.47e-05	0.000157403	4.93e-05	-0.000113439	3.88e-05
ASLEH4	ASLEH	0	-0.00144002	-0.00236307	-0.00252752	-0.00253492	-0.00228615	-0.00224983	-0.00210614	-0.0019467	-0.00185251	-0.00168974	-0.00162979	-0.00152515	-0.00135358	-0.00131626	-0.00114143	-0.000983996	-0.00100396	-0.000915328	-0.000797169	-0.000720325	-0.000638777	-0.000616595	-0.000533807	-0.000551616	-0.000411453	-0.000219798	-0.00023446	-0.000279873	-0.000296709	-0.000208135	-0.000273991	-7.67e-05	-8.15e-05	-0.000229832	-0.000194469	-0.000227753	8.56e-05	1.35e-05	4.2e-05	-0.000100606	-9.11e-05	-9.94e-05	-1.34e-06	5.75e-05	-4.05e-05	2.17e-05	0.000151768
ASLEH5	ASLEH	-7.78e-05	-0.000995809	-0.00152185	-0.00139463	-0.00129812	-0.00122186	-0.00113468	-0.00108029	-0.000883556	-0.00079884	-0.00069669	-0.000721858	-0.000875024	-0.000771196	-0.000720104	-0.000564744	-0.000636434	-0.000561884	-0.000403979	-0.000515343	-0.000418797	-0.000446771	-0.000302086	-0.000292216	-0.000136726	-0.000150254	-0.000205256	-0.000164458	-0.000256001	-0.000184029	-0.00017675	-0.000138044	-8.98e-05	3.63e-06	-0.000169164	2.61e-05	-1.03e-05	-0.000110144	9.75e-05	-1.21e-05	-2e-05	2.85e-05	4.92e-05	2.28e-05	0.000122696	6.26e-06	0.000124656	0.000167438
[truncated: 2,590 more columns]
